# Supplementary material for: Repertoire of morphable proteins in an organism
Source: PeerJ. 2020 Feb 11;8:e8606. doi: 10.7717/peerj.8606 (PMC7020816; doi:10.7717/peerj.8606)
Supplement: Supplemental Information 1 [file peerj-08-8606-s001.xlsx]

## Sheet: ECORI_UMF
Gene	Protein	UniProt	Entries	Entries(%)	Length	Length(%)	Resolution	Score	Chains	Resolution	UMF	by
AAT	Leucyl/phenylalanyl-tRNA--protein transferase (EC 2.3.2.6) (L/F-transferase) (Leucyltransferase) (Phenyalanyltransferase)	P0A8P1	9	100	123	52.6	2.49	158	9	2.49	158	x-ray			: reference set
ACCB	Biotin carboxyl carrier protein of acetyl-CoA carboxylase	P0ABD8	2	100	77	49.4	2.15		5	2.35	127.2	x-ray			: redundant for xUMF and eUMF
ACCC	Biotin carboxylase (EC 6.3.4.14) (Acetyl-CoA carboxylase subunit A) (ACC) (EC 6.4.1.2)	P24182	19	73.1	444	98.9	2.08	144.7	24	2.12	143.6	x-ray		bold	: more than 1 chains per entry
ACEB	Malate synthase A (MSA) (EC 2.3.3.9)	P08997	3	100	524	98.3	1.37	440	4	1.38	398.1	x-ray
ACEK	Isocitrate dehydrogenase kinase/phosphatase	Q8X607/A0A1Z3UWE5	4	80	415	71.8	2.89	187.5	6	2.82	157	x-ray
ACPP	Acyl carrier protein (ACP) (Cytosolic-activating factor) (CAF) (Fatty acid synthase acyl carrier protein)	P0A6A8	16	94.1	71	91	2.19	49.5	16	2.19	49.5	x-ray
ACPS	Holo-[acyl-carrier-protein] synthase	P24224	2	50	125	99.2	2.04		5	2.04	123	x-ray
ACRA	Multidrug efflux pump subunit AcrA	P0AE06/P0AE07	3	100	340	85.6	6.3	53.1	9	6.3	36.7	em
ACRB	Multidrug efflux pump subunit AcrB (AcrAB-TolC multidrug efflux pump subunit AcrB) (Acridine resistance protein B)	P31224	23	37.1	1032	98.4	2.88	75	23	2.88	75	x-ray
ACRB	Multidrug efflux pump subunit AcrB (AcrAB-TolC multidrug efflux pump subunit AcrB) (Acridine resistance protein B)	P31224	3	60	1032	98.4	6.3	59	9	6.3	43.4	em
ACRR	HTH-type transcriptional regulator AcrR	P0ACS9	2	100	207	96.3	2.52		3	2.5	243.8	x-ray
ACRZ	Multidrug efflux pump accessory protein AcrZ	P0AAW9/P0AAX1	3	100	36	73.5	3.4	312.1	5	3.32	129.2	x-ray
ACUI	Probable acrylyl-CoA reductase AcuI (EC 1.3.1.84) (Acryloyl-coenzyme A reductase AcuI)	P26646	2	100	311	96	2.43		5	2.53	233.8	x-ray
ADHP	Alcohol dehydrogenase, propanol-preferring	P39451	1	100	336	100	2.01		4	2.01	565.6	x-ray
ADIA	Biodegradative arginine decarboxylase (ADC) (EC 4.1.1.19)	P28629	1	100	755	100	2.4		10	2.4	431.5	x-ray
ADIC	Arginine/agmatine antiporter	P60061/P60063	3	50	435	97.8	2.6	261.8	5	2.52	204	x-ray
ADK	Adenylate kinase (AK) (EC 2.7.4.3) (ATP-AMP transphosphorylase) (ATP:AMP phosphotransferase) (Adenylate monophosphate kinase)	P69441	12	100	214	100	2.13	41.6	12	2.13	41.6	x-ray
AES	Acetyl esterase (EC 3.1.1.-) (EcE)	P23872	2	100	313	98.1	2.05		9	2.13	170.2	x-ray
AGAS	Putative tagatose-6-phosphate ketose/aldose isomerase (EC 5.3.1.-)	P42907	1	100	359	93.5	1.8		6	1.8	484.4	x-ray
AHPC	Alkyl hydroperoxide reductase subunit C (EC 1.11.1.15) (Alkyl hydroperoxide reductase protein C22) (Peroxiredoxin) (SCRP-23) (Sulfate starvation-induced protein 8) (SSI8) (Thioredoxin peroxidase)	P0AE08/A0A140NC97	5	100	164	87.7	3.26	169.2	15	3.26	137.5	x-ray
AHPF	Alkyl hydroperoxide reductase subunit F (EC 1.8.1.-) (Alkyl hydroperoxide reductase F52A protein)	P35340	5	83.3	519	99.6	2.35	124.7	5	2.35	124.7	x-ray
AIDB	Putative acyl-CoA dehydrogenase AidB (EC 1.3.99.-)	P33224	2	100	538	99.4	2.25		6	2.62	602.1	x-ray
ALAS	Alanine--tRNA ligase (EC 6.1.1.7) (Alanyl-tRNA synthetase) (AlaRS)	P00957	8	100	440	50.2	2.13	223.5	8	2.13	223.5	x-ray
ALDA	Lactaldehyde dehydrogenase (EC 1.2.1.22) (Aldehyde dehydrogenase A) (Glycolaldehyde dehydrogenase) (EC 1.2.1.21)	P25553	4	100	477	99.6	2.38	194.1	4	2.38	194.1	x-ray
ALKA	DNA-3-methyladenine glycosylase 2 (EC 3.2.2.21) (3-methyladenine-DNA glycosylase II, inducible) (TAG II) (DNA-3-methyladenine glycosidase II) (DNA-3-methyladenine glycosylase II)	P04395	14	100	281	99.6	2.51	124.8	14	2.51	124.8	x-ray
ALKB	Alpha-ketoglutarate-dependent dioxygenase AlkB (EC 1.14.11.33) (Alkylated DNA repair protein AlkB) (DNA oxidative demethylase AlkB)	P05050	33	97.1	198	91.7	1.78	109.7	33	1.78	109.7	x-ray
ALLA	Ureidoglycolate lyase	P77731/P63486	2	100	108	67.5	1.66		4	1.66	255.3	x-ray
ALLB	Allantoinase	P77671	1	100	290	64	2.1		4	2.1	486.1	x-ray
ALLC	Allantoate amidohydrolase	P77425	2	66.7	409	99.5	2.23		4	2.23	89.5	x-ray
ALLD	Ureidoglycolate dehydrogenase (NAD(+)) (EC 1.1.1.350)	P77555/(B1XGB5)	4	100	336	96.3	1.95	256.5	11	2.14	153.9	x-ray
ALLR	HTH-type transcriptional repressor AllR	P0ACN4	1	100	172	63.5	1.8		4	1.8	244.9	x-ray
ALR	Alanine racemase, biosynthetic (EC 5.1.1.1)	P0A6B4	8	100	357	99.4	2.53	463.7	8	2.53	463.7	x-ray
ALSB	D-allose-binding periplasmic protein (ALBP)	P39265	3	100	288	92.6	2.2	89.5	4	2.08	73.4	x-ray
ALSE	D-allulose-6-phosphate 3-epimerase (EC 5.1.3.-)	P32719	2	100	219	94.8	2.35		12	2.35	756.2	x-ray
AMID	N-acetylmuramoyl-L-alanine amidase AmiD (EC 3.5.1.28)	P75820	4	100	254	92	2.14	158.9	4	2.14	158.9	x-ray
AMN	AMP nucleosidase (EC 3.2.2.4)	P0AE12	4	100	269	55.6	2.78	311.3	8	2.78	293.4	x-ray
AMPC	Beta-lactamase (EC 3.5.2.6) (Cephalosporinase)	P00811	95	93.1	357	94.7	1.82	180.9	95	1.82	180.9	x-ray
AMTB	Ammonia channel (Ammonia transporter)	P69681	4	19	383	89.5	1.93	156.4	9	2.25	122.3	x-ray
ANSA	L-asparaginase 1 (EC 3.5.1.1) (L-asparaginase I) (L-ASNase I) (L-asparagine amidohydrolase I)	P0A962	3	100	250	74	1.87	179.1	6	1.87	144.6	x-ray
ANSB	L-asparaginase 2 (EC 3.5.1.1) (L-asparaginase II) (L-ASNase II) (L-asparagine amidohydrolase II) (Colaspase)	P00805	8	100	267	76.7	2.23	140.5	8	2.23	140.5	x-ray
APBE	FAD:protein FMN transferase (EC 2.7.1.180) (Flavin transferase)	P0AB85	3	75	203	57.8	1.94	230.5	7	1.93	145.8	x-ray
APHA	Class B acid phosphatase (CBAP) (EC 3.1.3.2)	P0AE22	11	100	209	88.2	1.74	208.8	11	1.74	208.8	x-ray
APPA	Periplasmic AppA protein [Includes: Phosphoanhydride phosphohydrolase (EC 3.1.3.2) (pH 2.5 acid phosphatase) (AP); 4-phytase (EC 3.1.3.26)]	P07102	5	71.4	410	94.9	2.27	337.6	5	2.27	337.6	x-ray
AQPZ	Aquaporin Z (Bacterial nodulin-like intrinsic protein)	P60844	9	100	227	98.3	2.52	164.6	9	2.52	164.6	x-ray
ARAA	L-arabinose isomerase (EC 5.3.1.4)	P08202	3	100	498	99.6	2.57	523.4	6	2.57	310.1	x-ray
ARAC	Arabinose operon regulatory protein	P0A9E0	4	100	149	51	2.08	120.2	7	1.97	98.9	x-ray
ARAD	L-ribulose-5-phosphate 4-epimerase AraD (EC 5.1.3.4) (Phosphoribulose isomerase)	P08203	2	100	223	96.5	2.25		12	2.25	317	x-ray
ARAF	L-arabinose-binding periplasmic protein (ABP)	P02924	10	100	299	90.9	1.79	153.3	10	1.79	153.3	x-ray
ARCA	Aerobic respiration control protein ArcA	P0A9Q1	2	100	121	50.8	2.33		4	2.33	167.5	x-ray
ARCB	Aerobic respiration control sensor protein ArcB	P0AEC3	3	100	117	15	2.1	295.2	3	2.1	295.2	x-ray
ARFA	Alternative ribosome-rescue factor A	P36675	7	70	45	62.5	3.25	76.1	7	3.25	76.1	em
ARGB	Acetylglutamate kinase (EC 2.7.2.8) (N-acetyl-L-glutamate 5-phosphotransferase) (NAG kinase) (NAGK)	P0A6C8/A0A140NEG9	7	100	258	100	1.87	110.5	8	1.88	108.8	x-ray
ARGG	Argininosuccinate synthase (EC 6.3.4.5) (Citrulline--aspartate ligase)	P0A6E4	3	75	384	85.9	1.87	303.3	3	1.87	303.3	x-ray
ARGI	Ornithine carbamoyltransferase subunit I (OTCase-1) (EC 2.1.3.3)	P04391	3	100	234	70.1	2.43	222.1	6	2.43	184.8	x-ray
ARGR	Arginine repressor	P0A6D0	3	100	71	45.5	2.53	111.7	6	2.53	72.7	x-ray
ARNA	Bifunctional polymyxin resistance protein ArnA (Polymyxin resistance protein PmrI) [Includes: UDP-4-amino-4-deoxy-L-arabinose formyltransferase (EC 2.1.2.13) (ArnAFT) (UDP-L-Ara4N formyltransferase); UDP-glucuronic acid oxidase, UDP-4-keto-hexauronic acid decarboxylating (EC 1.1.1.305) (ArnADH) (UDP-GlcUA decarboxylase) (UDP-glucuronic acid dehydrogenase)]	P77398	7	70	287	43.5	2.52	148.6	13	2.67	126.8	x-ray
AROA	3-phosphoshikimate 1-carboxyvinyltransferase (EC 2.5.1.19) (5-enolpyruvylshikimate-3-phosphate synthase) (EPSP synthase) (EPSPS)	P0A6D3	18	100	427	100	1.69	122.4	18	1.69	122.4	x-ray
AROE	Shikimate dehydrogenase (NADP(+)) (SD) (SDH) (EC 1.1.1.25)	P15770	1	100	269	98.9	1.5		4	1.5	172.9	x-ray
AROF	Phospho-2-dehydro-3-deoxyheptonate aldolase, Tyr-sensitive	P00888	1	50	306	86	2		4	2	311.3	x-ray
AROG	Phospho-2-dehydro-3-deoxyheptonate aldolase, Phe-sensitive (EC 2.5.1.54) (3-deoxy-D-arabino-heptulosonate 7-phosphate synthase) (DAHP synthase) (Phospho-2-keto-3-deoxyheptonate aldolase)	P0AB91	4	80	305	87.1	2.12	280.2	4	2.12	280.2	x-ray
ARSC	Arsenate reductase	P08692	11	100	138	97.9	1.58	298.5	11	1.58	298.5	x-ray
ASCG	HTH-type transcriptional regulator AscG (Cryptic asc operon repressor)	P24242	2	100	276	82.1	2.23		4	2.34	190.3	x-ray
ASD	Aspartate-semialdehyde dehydrogenase (ASA dehydrogenase) (ASADH) (EC 1.2.1.11) (Aspartate-beta-semialdehyde dehydrogenase)	P0A9Q9	3	75	367	100	2.05	223.8	7	2.04	167.6	x-ray
ASNA	Aspartate--ammonia ligase	P00963	2	100	327	99.1	2.35		4	2.35	193.7	x-ray
ASPA	Aspartate ammonia-lyase	P0AC38	1	100	413	86.4	2.7		4	2.7	146.1	x-ray
ASPC	Aspartate aminotransferase (AspAT) (EC 2.6.1.1) (Transaminase A)	P00509	78	90.7	396	100	2.23	92.4	78	2.23	92.4	x-ray
ASPS	Aspartate--tRNA ligase (EC 6.1.1.12) (Aspartyl-tRNA synthetase) (AspRS)	P21889	3	100	585	99.2	2.57	157.2	5	2.6	91.9	x-ray
ASTB	N-succinylarginine dihydrolase (EC 3.5.3.23)	P76216	3	100	411	91.9	2.02	493.8	12	2.02	328.1	x-ray
ASTC	Succinylornithine transaminase (SOAT) (EC 2.6.1.81) (Carbon starvation protein C) (Succinylornithine aminotransferase)	P77581	4	100	400	48.5	2.43	414.7	12	2.36	272.1	x-ray
ATOA	Acetate CoA-transferase subunit beta	P76459	1	100	212	98.1	2.55		4	2.55	273.9	x-ray
ATOB	Acetyl-CoA acetyltransferase (EC 2.3.1.9) (Acetoacetyl-CoA thiolase)	P76461	3	100	392	99.5	1.93	530.3	8	1.96	323	x-ray
ATOD	Acetate CoA-transferase subunit alpha (EC 2.8.3.8) (Acetyl-CoA:acetoacetate-CoA transferase subunit alpha)	P76458	2	100	213	96.8	2.23		5	2.42	208.1	x-ray
ATPA	ATP synthase subunit alpha (EC 3.6.3.14) (ATP synthase F1 sector subunit alpha) (F-ATPase subunit alpha)	P0ABB0	1	100	486	94.7	3.26		9	3.26	161.7	x-ray
ATPA	ATP synthase subunit alpha (EC 3.6.3.14) (ATP synthase F1 sector subunit alpha) (F-ATPase subunit alpha)	P0ABB0	3	100	486	94.7	7.73	68.1	9	7.73	36.5	em
ATPC	ATP synthase epsilon chain (ATP synthase F1 sector epsilon subunit) (F-ATPase epsilon subunit)	P0A6E6	3	75	134	96.4	3.15	131.3	6	3.21	135.6	x-ray
ATPC	ATP synthase epsilon chain (ATP synthase F1 sector epsilon subunit) (F-ATPase epsilon subunit)	P0A6E6	3	100	134	96.4	7.73	72.2	3	7.73	72.2	em
ATPD	ATP synthase subunit beta (EC 3.6.3.14) (ATP synthase F1 sector subunit beta) (F-ATPase subunit beta)	P0ABB4	1	100	458	99.6	3.26		6	3.26	86.1	x-ray
ATPD	ATP synthase subunit beta (EC 3.6.3.14) (ATP synthase F1 sector subunit beta) (F-ATPase subunit beta)	P0ABB4	3	100	458	99.6	7.73	44.4	9	7.73	28.3	em
ATPE	ATP synthase subunit c	P68699	3	75	75	94.9	7.73	200.8	15	7.73	117.9	em
ATPF	ATP synthase subunit b	P0ABA0	3	100	155	99.4	7.73	133.2	6	7.73	71.3	em
ATPG	ATP synthase gamma chain	P0ABA6	2	100	130	45.3	2.68		5	3.03	774.4	x-ray
AZOR	FMN-dependent NADH-azoreductase (EC 1.7.-.-) (Azo-dye reductase) (FMN-dependent NADH-azo compound oxidoreductase)	P41407	7	100	135	67.2	1.97	175.6	8	1.99	172.5	x-ray
BAER	Transcriptional regulatory protein BaeR	P69229	1	100	117	48.8	3.3		12	3.3	302.1	x-ray
BAMA	Outer membrane protein assembly factor BamA (Omp85)	P0A940	3	23.1	509	62.8	3.32	87.5	4	3.37	59.4	x-ray
BAMB	Outer membrane protein assembly factor BamB	P77774	6	54.5	202	51.5	2.29	104.7	6	2.29	104.7	x-ray
BAMD	Outer membrane protein assembly factor BamD	P0AC02	3	42.9	217	88.6	3.26	142	5	3.24	116.3	x-ray
BAME	Outer membrane protein assembly factor BamE	P0A937	4	80	82	72.6	3.34	60	5	3.37	58.2	x-ray
BCSZ	Endoglucanase (EC 3.2.1.4) (Carboxymethylcellulase) (CMCase) (Cellulase) (Endo-1,4-beta-glucanase)	P37651	2	100	337	91.6	2.03		8	2.03	312.5	x-ray
BDCA	Cyclic-di-GMP-binding biofilm dispersal mediator protein	P39333	1	100	236	99.6	1.7		12	1.7	379.6	x-ray
BEPA	Beta-barrel assembly-enhancing protease	P66948	1	50	287	58.9	2.6		5	2.6	214	x-ray
BFR	Bacterioferritin (BFR) (EC 1.16.3.1) (Cytochrome b-1) (Cytochrome b-557)	P0ABD3	21	100	154	97.5	2.21	126.1	21	2.21	126.1	x-ray
BGLA	6-phospho-beta-glucosidase BglA (EC 3.2.1.86) (Phospho-beta-glucosidase A)	Q46829	1	100	320	66.8	2.3		4	2.3	406.8	x-ray
BIOA	Adenosylmethionine-8-amino-7-oxononanoate aminotransferase (EC 2.6.1.62) (7,8-diamino-pelargonic acid aminotransferase) (DAPA AT) (DAPA aminotransferase) (7,8-diaminononanoate synthase) (DANS) (Diaminopelargonic acid synthase)	P12995	9	81.8	428	99.8	2.02	204.3	9	2.02	204.3	x-ray
BIOD1	ATP-dependent dethiobiotin synthetase BioD 1 (EC 6.3.3.3) (DTB synthetase 1) (DTBS 1) (Dethiobiotin synthase)	P13000	13	100	206	91.6	1.64	153.5	13	1.64	153.5	x-ray
BIOF	8-amino-7-oxononanoate synthase (AONS) (EC 2.3.1.47) (7-keto-8-amino-pelargonic acid synthase) (7-KAP synthase) (KAPA synthase) (8-amino-7-ketopelargonate synthase)	P12998	4	100	383	99.7	1.88	211.6	4	1.88	211.6	x-ray
BIRA	Bifunctional ligase/repressor BirA (Biotin operon repressor) (Biotin--[acetyl-CoA-carboxylase] ligase) (EC 6.3.4.15) (Biotin--protein ligase) (Biotin-[acetyl-CoA carboxylase] synthetase)	P06709	3	60	189	58.9	2.5	139.9	5	2.54	96.4	x-ray
BLC	Outer membrane lipoprotein Blc	P0A901	3	100	149	84.2	2.05	302.6	5	1.94	161.4	x-ray
BTUB	Vitamin B12 transporter BtuB (Cobalamin receptor) (Outer membrane cobalamin translocator)	P06129	8	66.7	307	50	2.63	161.7	8	2.63	161.7	x-ray
BTUC	Vitamin B12 import system permease protein BtuC	P06609	5	100	324	99.4	3.11	75.9	5	3.11	75.9	x-ray
BTUD	Vitamin B12 import ATP-binding protein BtuD (EC 3.6.3.33) (Vitamin B12-transporting ATPase)	P06611	5	100	231	92.8	3.11	154.4	5	3.11	154.4	x-ray
BTUF	Vitamin B12-binding protein	P37028	11	100	193	72.6	2.32	75.9	11	2.32	75.9	x-ray
CADA	Inducible lysine decarboxylase	P0A9H3	2	100	711	99.4	3.05		10	3.05	279	x-ray
CADC	Transcriptional activator CadC	P23890	4	80	318	62.1	2.05	191.8	4	2.05	191.8	x-ray
CAIB	L-carnitine CoA-transferase (EC 2.8.3.21) (Crotonobetainyl-CoA:carnitine CoA-transferase)	P31572	7	100	400	98.8	2.04	186.1	7	2.04	186.1	x-ray
CAIT	L-carnitine/gamma-butyrobetaine antiporter	P31553	2	100	492	97.6	3.33		4	3.41	406.3	x-ray
CAN	Carbonic anhydrase 2 (EC 4.2.1.1) (Carbonate dehydratase 2)	P61517/A0A140NBR3	5	100	213	96.8	2.33	166.9	9	2.34	150.3	x-ray
CARA	Carbamoyl-phosphate synthase small chain (EC 6.3.5.5) (Carbamoyl-phosphate synthetase glutamine chain)	P0A6F1	8	80	357	93.5	2.09	229.7	8	2.09	229.7	x-ray
CARB	Carbamoyl-phosphate synthase large chain (EC 6.3.5.5) (Carbamoyl-phosphate synthetase ammonia chain)	P00968	10	100	715	66.6	2.05	300.9	10	2.05	300.9	x-ray
CASA	CRISPR system Cascade subunit CasA (CRISPR type I-E/Ecoli-associated protein CasA/Cse1) (CRISPR-associated protein CasA/Cse1)	Q46901	3	50	319	63.5	3.15	162.9	4	3.17	130.4	x-ray
CASB	CRISPR system Cascade subunit CasB	P76632	3	50	155	96.9	3.15	172.5	7	3.13	113	x-ray
CASC	CRISPR system Cascade subunit CasC	Q46899	5	83.3	334	92	2.98	195.5	10	2.98	156.9	x-ray
CASD	CRISPR system Cascade subunit CasD	Q46898	5	83.3	218	97.3	3.02	188.5	7	3.04	174.2	x-ray
CASE	CRISPR system Cascade subunit CasE (EC 3.1.-.-) (CasE endoRNase) (crRNA endonuclease)	Q46897	3	42.9	164	82.4	2.81	165.8	5	2.98	115.8	x-ray
CBL	HTH-type transcriptional regulator cbl	Q47083	1	100	220	69.6	2.8		4	2.8	243.8	x-ray
CDD	Cytidine deaminase (EC 3.5.4.5) (Cytidine aminohydrolase) (CDA)	P0ABF6	4	100	294	100	2.28	434	4	2.28	434	x-ray
CHEY	Chemotaxis protein CheY	P0AE67	55	98.2	124	96.1	2.05	54.1	55	2.05	54.1	x-ray
CLCA	H(+)/Cl(-) exchange transporter ClcA (ClC-ec1)	P37019	39	97.5	430	90.9	3.14	120.1	39	3.14	120.1	x-ray
CLPB	Chaperone protein ClpB	V2RJ62	3	100	417	48.7	4.8	116.2	9	4.8	73	em
CLPP	ATP-dependent Clp protease proteolytic subunit (EC 3.4.21.92) (Caseinolytic protease) (Endopeptidase Clp) (Heat shock protein F21.5) (Protease Ti)	P0A6G7	5	83.3	179	86.5	2.12	113.9	5	2.12	113.9	x-ray
CLPS	ATP-dependent Clp protease adapter protein ClpS	P0A8Q6	14	100	81	76.4	2.29	93.9	14	2.29	93.9	x-ray
CMK	Cytidylate kinase (CK) (EC 2.7.4.25) (Cytidine monophosphate kinase) (CMP kinase) (Protein MssA) (p25)	P0A6I0	8	100	177	78	2.11	54.8	8	2.11	54.8	x-ray
CMOA	Carboxy-S-adenosyl-L-methionine synthase	P76290/C3T5M2	2	100	225	91.1	1.62		4	1.62	343.3	x-ray
CMOB	tRNA U34 carboxymethyltransferase	P76291/A1AC32	3	100	285	88.2	2.62	325	12	2.61	280.2	x-ray
COAA	Pantothenate kinase (EC 2.7.1.33) (Pantothenic acid kinase) (Rts protein)	P0A6I3	3	100	286	90.5	2.43	100.4	5	2.5	96.4	x-ray
COAD	Phosphopantetheine adenylyltransferase (EC 2.7.7.3) (Dephospho-CoA pyrophosphorylase) (Pantetheine-phosphate adenylyltransferase) (PPAT)	P0A6I6	25	100	157	98.7	1.9	117.5	25	1.9	117.5	x-ray
COAE	Dephospho-CoA kinase (EC 2.7.1.24) (Dephosphocoenzyme A kinase)	P0A6I9	5	100	205	99.5	1.89	121.1	5	1.89	121.1	x-ray
COBC	Adenosylcobalamin/alpha-ribazole phosphatase	P52086	1	100	201	99	2.55		3	2.55	374.4	x-ray
CODA	Cytosine deaminase (CD) (CDA) (CDase) (EC 3.5.4.1) (Cytosine aminohydrolase) (Isoguanine deaminase) (EC 3.5.4.-)	P25524	12	100	422	98.8	1.59	288.9	12	1.59	288.9	x-ray
CORA	Magnesium transport protein CorA	P0ABI4	2	100	257	81.3	2.83		7	2.83	549.5	x-ray
CPOB	Cell division coordinator CpoB	P45955	2	100	66	25.1	2.15		8	2.15	169.8	x-ray
CPXA	Sensor histidine kinase CpxA (EC 2.7.13.3)	P0AE82	8	100	179	39.2	3.03	60.6	8	3.03	60.6	x-ray
CPXP	Periplasmic protein CpxP	P0AE85	2	100	107	64.5	2.15		4	2.15	85.6	x-ray
CPXR	Transcriptional regulatory protein CpxR	P0AE88	3	100	122	52.6	3.17	422.5	8	3.33	170.9	x-ray
CRCB	Putative fluoride ion transporter CrcB	Q6J5N4/B7LI20	9	100	123	97.6	2.7	152.1	9	2.7	152.1	x-ray
CRP	cAMP-activated global transcriptional regulator CRP (Catabolite activator protein) (CAP) (Catabolite gene activator) (cAMP receptor protein) (CRP) (cAMP regulatory protein)	P0ACJ8	37	97.4	197	93.8	2.41	47.1	37	2.41	47.1	x-ray
CRR	PTS system glucose-specific EIIA component (EIIA-Glc) (EIII-Glc) (Glucose-specific phosphotransferase enzyme IIA component) (EC 2.7.1.199)	P69783	9	100	149	88.2	2.65	94.5	9	2.65	94.5	x-ray
CSDA	Cysteine desulfurase CsdA (EC 2.8.1.7) (Cysteine sulfinate desulfinase) (CSD) (EC 4.4.1.-) (Selenocysteine lyase) (EC 4.4.1.16)	Q46925	5	83.3	398	99.3	2.05	253	9	2.03	219.5	x-ray
CSDE	Sulfur acceptor protein CsdE	P0AGF2	3	75	133	90.5	2.27	120	4	2.3	84	x-ray
CSGC	Curli assembly protein	B2CY50/(B5YVR5)	3	100	95	86.4	2	190.9	3	2	190.9	x-ray
CSGG	Curli production assembly/transport component CsgG	P0AEA2	1	50	179	64.6	2.8		12	2.8	203.1	x-ray
CSRA	Carbon storage regulator	P69913	1	100	54	88.5	2.29		4	2.29	162.6	x-ray
CUEO	Blue copper oxidase CueO (Copper efflux oxidase)	P36649	33	84.6	348	67.4	1.65	195.3	33	1.65	195.3	x-ray
CUER	HTH-type transcriptional regulator CueR (Copper efflux regulator) (Copper export regulator)	P0A9G4	5	100	111	82.2	2.34	85.4	5	2.34	85.4	x-ray
CUSA	Cation efflux system protein CusA	P38054	10	90.9	522	49.9	3.7	79.4	10	3.7	79.4	x-ray
CUSB	Cation efflux system protein CusB	P77239	11	100	296	72.7	3.59	60.3	11	3.59	60.3	x-ray
CUSC	Cation efflux system protein CusC	P77211	4	100	327	71.6	2.4	83.5	5	2.43	71.5	x-ray
CUSF	Cation efflux system protein CusF	P77214	5	100	75	68.2	1.51	106.7	5	1.51	106.7	x-ray
CUSS	Sensor histidine kinase CusS	P77485	1	100	144	30	2.15		4	2.15	160.5	x-ray
CUTA	Divalent-cation tolerance protein CutA (C-type cytochrome biogenesis protein CycY)	P69488	7	100	102	91.1	2.03	100.9	7	2.03	100.9	x-ray
CYAY	Protein CyaY	P27838	3	100	106	100	1.54	298.3	3	1.54	298.3	x-ray
CYNR	HTH-type transcriptional regulator CynR (Cyn operon transcriptional activator)	P27111	2	100	200	66.9	2.33		6	2.42	380.2	x-ray
CYNS	Cyanate hydratase (Cyanase) (EC 4.2.1.104) (Cyanate hydrolase) (Cyanate lyase)	P00816	8	100	156	100	1.86	270.6	8	1.86	270.6	x-ray
CYOA	Cytochrome bo(3) ubiquinol oxidase subunit 2 (Cytochrome b562-o complex subunit II) (Cytochrome o ubiquinol oxidase subunit 2) (Cytochrome o subunit 2) (Oxidase bo(3) subunit 2) (Ubiquinol oxidase chain B) (Ubiquinol oxidase polypeptide II) (Ubiquinol oxidase subunit 2)	P0ABJ1	3	100	158	50.2	2.77	113.7	4	2.95	113.3	x-ray
CYSE	Serine acetyltransferase	P0A9D4	1	100	262	96	2.2		3	2.2	534.1	x-ray
CYSI	Sulfite reductase [NADPH] hemoprotein beta-component (SiR-HP) (SiRHP) (EC 1.8.1.2)	P17846	17	89.5	359	63	1.92	266.8	17	1.92	266.8	x-ray
CYSJ	Sulfite reductase [NADPH] flavoprotein alpha-component	P38038/W8SX42	3	100	374	62.4	2.29	296.9	4	2.22	234.9	x-ray
CYSK	Cysteine synthase A	P0ABK6	2	100	312	96.6	2.73		4	2.73	413.3	x-ray
CYSM	Cysteine synthase B (CSase B) (EC 2.5.1.47) (O-acetylserine (thiol)-lyase B) (OAS-TL B) (O-acetylserine sulfhydrylase B)	P16703	3	100	291	96	2.03	169.8	5	2.29	142.9	x-ray
CYSS	Cysteine--tRNA ligase (EC 6.1.1.16) (Cysteinyl-tRNA synthetase) (CysRS)	P21888	3	100	228	49.5	2.4	286.9	3	2.4	286.9	x-ray
DACA	D-alanyl-D-alanine carboxypeptidase DacA (DD-carboxypeptidase) (DD-peptidase) (EC 3.4.16.4) (Beta-lactamase) (EC 3.5.2.6) (Penicillin-binding protein 5) (PBP-5)	P0AEB2/A0A0A0GRC5	8	61.5	352	87.3	1.84	227.4	8	1.84	227.4	x-ray
DACB	D-alanyl-D-alanine carboxypeptidase DacB (DD-carboxypeptidase) (DD-peptidase) (EC 3.4.16.4) (D-alanyl-D-alanine endopeptidase) (DD-endopeptidase) (EC 3.4.21.-) (Penicillin-binding protein 4) (PBP-4)	P24228	6	100	422	88.5	1.64	404.5	6	1.64	404.5	x-ray
DACC	D-alanyl-D-alanine carboxypeptidase DacC (DD-carboxypeptidase) (DD-peptidase) (EC 3.4.16.4) (Penicillin-binding protein 6) (PBP-6)	P08506	3	100	345	86.3	1.9	296.7	8	1.91	144.9	x-ray
DAM	DNA adenine methylase (EC 2.1.1.72) (DNA adenine methyltransferase) (Deoxyadenosyl-methyltransferase) (M.EcoDam)	P0AEE8	17	100	185	66.5	2.42	73.3	17	2.42	73.3	x-ray
DAPA	4-hydroxy-tetrahydrodipicolinate synthase (HTPA synthase) (EC 4.3.3.7)	P0A6L2/A0A066Q637/B7M7I1	21	100	292	100	2.1	235.8	24	2.12	222.4	x-ray
DAPB	4-hydroxy-tetrahydrodipicolinate reductase (HTPA reductase) (EC 1.17.1.8)	P04036	5	100	270	98.9	2.28	101.5	5	2.28	101.5	x-ray
DAPF	Diaminopimelate epimerase	P0A6K1/B7MH73/A7ZU14	6	100	274	100	2.23	100	8	2.18	99.2	x-ray
DCD	dCTP deaminase (EC 3.5.4.13) (Deoxycytidine triphosphate deaminase)	P28248	6	100	174	90.2	2.31	145.5	6	2.31	145.5	x-ray
DDLB	D-alanine--D-alanine ligase B (EC 6.3.2.4) (D-Ala-D-Ala ligase B) (D-alanylalanine synthetase B)	P07862	6	100	306	100	1.83	151.5	6	1.83	151.5	x-ray
DEF	Peptide deformylase (PDF) (EC 3.5.1.88) (Polypeptide deformylase)	P0A6K3	22	95.7	161	95.3	2.13	119.1	22	2.13	119.1	x-ray
DEGP	Periplasmic serine endoprotease DegP (EC 3.4.21.107) (Heat shock protein DegP) (Protease Do)	P0C0V0	5	62.5	367	77.4	3.26	132.1	5	3.26	132.1	x-ray
DEGQ	Periplasmic pH-dependent serine endoprotease DegQ	P39099	1	50	276	60.7	2.6		12	2.6	368	x-ray
DEGQ	Periplasmic pH-dependent serine endoprotease DegQ	P39099	2	50	365	80.2	7.5		8	7.5	56.1	em
DEGS	Serine endoprotease DegS (EC 3.4.21.107) (Site-1 protease DegS) (S1P protease DegS) (Site-1-type intramembrane protease)	P0AEE3	14	50	179	50.4	2.51	88.7	14	2.51	88.7	x-ray
DEOA	Thymidine phosphorylase (EC 2.4.2.4) (TdRPase)	P07650	7	100	439	99.8	2.25	122.7	7	2.25	122.7	x-ray
DEOC	Deoxyribose-phosphate aldolase (DERA) (EC 4.1.2.4) (2-deoxy-D-ribose 5-phosphate aldolase) (Phosphodeoxyriboaldolase) (Deoxyriboaldolase)	P0A6L0	7	100	248	95.8	1.2	301.1	11	1.18	278.6	x-ray
DEOD	Purine nucleoside phosphorylase DeoD-type (PNP) (EC 2.4.2.1) (Inosine phosphorylase)	P0ABP8	20	100	237	99.2	2.21	126.5	20	2.21	126.5	x-ray
DGCZ	Diguanylate cyclase YdeH (DGC) (EC 2.7.7.65)	P31129	2	66.7	170	57.4	2.85		3	3.2	465.4	x-ray
DGKA	Diacylglycerol kinase (DAGK) (EC 2.7.1.107) (Diglyceride kinase) (DGK)	P0ABN1	17	94.4	113	92.6	2.84	77.1	17	2.84	77.1	x-ray
DGOA	2-dehydro-3-deoxy-6-phosphogalactonate aldolase (EC 4.1.2.21) (2-oxo-3-deoxygalactonate 6-phosphate aldolase) (6-phospho-2-dehydro-3-deoxygalactonate aldolase) (6-phospho-2-keto-3-deoxygalactonate aldolase) (KDPGal)	Q6BF16	3	100	199	97.1	3.86	298.8	4	4.67	315.3	x-ray
DGT	Deoxyguanosinetriphosphate triphosphohydrolase (dGTP triphosphohydrolase) (dGTPase) (EC 3.1.5.1)	P15723	4	57.1	502	99.4	3.15	201.8	11	3.27	152	x-ray
DHAK	PEP-dependent dihydroxyacetone kinase, dihydroxyacetone-binding subunit DhaK (EC 2.7.1.121)	P76015	4	36.4	354	99.4	2.62	222	7	2.68	184.8	x-ray
DHAL	PEP-dependent dihydroxyacetone kinase, ADP-binding subunit DhaL (EC 2.7.1.121)	P76014	3	100	203	96.7	2.37	229	5	2.35	196.1	x-ray
DHAR	PTS-dependent dihydroxyacetone kinase operon regulatory protein	P76016	3	100	294	46	2.8	173.3	6	2.8	111.7	x-ray
DIAA	DnaA initiator-associating protein DiaA	P66817	2	100	191	97.4	1.88		3	1.87	390.5	x-ray
DINB	DNA polymerase IV (Pol IV) (EC 2.7.7.7)	Q47155	14	48.3	340	96.9	2.26	149.8	19	2.31	149.8	x-ray
DINJ	Antitoxin DinJ	Q47150	2	100	83	95.5	1.95		15	1.94	257.7	x-ray
DKSA	RNA polymerase-binding transcription factor DksA (DnaK suppressor protein)	P0ABS1	3	100	140	92.7	3.6	77.7	5	3.46	61.3	x-ray
DLGD	2,3-diketo-L-gulonate reductase (2,3-DKG reductase) (EC 1.1.1.130) (3-dehydro-L-gulonate 2-dehydrogenase)	P37672	2	100	332	100	2		8	2.1	147.2	x-ray
DMSD	Tat proofreading chaperone DmsD (DMSO reductase maturation protein) (Twin-arginine leader-binding protein DmsD)	P69853	3	100	203	99.5	2.3	288.9	12	2.39	155.8	x-ray
DNAB	Replicative DNA helicase (EC 3.6.4.12)	P0ACB0	3	100	445	94.5	3.8	46.7	9	3.8	31.3	em
DNAC	DNA replication protein DnaC	P0AEF0	2	100	147	60	3.65		8	3.65	43.6	em
DNAE	DNA polymerase III subunit alpha (EC 2.7.7.7)	P10443	5	100	268	23.1	2.33	162.4	5	2.33	162.4	x-ray
DNAE	DNA polymerase III subunit alpha (EC 2.7.7.7)	P10443	4	100	926	79.8	7.6	69.9	4	7.6	69.9	em
DNAG	DNA primase	P0ABS5	2	25	304	52.3	2.63		6	2.81	161.6	x-ray
DNAK	Chaperone protein DnaK (HSP70) (Heat shock 70 kDa protein) (Heat shock protein 70)	P0A6Y8	4	10	424	66.5	2.48	246.8	6	2.36	233.8	x-ray
DNAN	DNA polymerase III subunit beta (EC 2.7.7.7) (Beta sliding clamp) (Beta clamp)	P0A988	33	89.2	338	92.3	1.96	86.8	33	1.96	86.8	x-ray
DNAN	DNA polymerase III subunit beta (EC 2.7.7.7) (Beta sliding clamp) (Beta clamp)	P0A988	4	100	366	100	7.6	91.7	8	7.6	65.9	em
DNAQ	DNA polymerase III subunit epsilon (EC 2.7.7.7)	P03007	4	66.7	174	71.6	1.8	161.9	4	1.8	161.9	x-ray
DNAQ	DNA polymerase III subunit epsilon (EC 2.7.7.7)	P03007	4	100	174	71.6	7.6	64.5	4	7.6	64.5	em
DNAT	Primosomal protein 1 (Primosomal protein I)	P0A8J2	2	100	71	39.7	2.4		8	2.4	144.3	x-ray
DNAX	DNA polymerase III subunit tau (EC 2.7.7.7) (DNA polymerase III subunit gamma)	P06710	6	66.7	365	56.8	3.4	69.1	6	3.4	69.1	x-ray
DOSC	Diguanylate cyclase DosC	P0AA89	4	50	161	35	1.96	141.1	6	2.23	117.4	x-ray
DPPA	Periplasmic dipeptide transport protein (Dipeptide-binding protein) (DBP)	P23847	2	100	507	94.8	2.6		5	2.96	560	x-ray
DPS	DNA protection during starvation protein (EC 1.16.-.-)	P0ABT2	9	81.8	155	92.8	2.55	179.1	18	2.55	174.5	x-ray
DSBA	Thiol:disulfide interchange protein DsbA	P0AEG4	20	95.2	185	88.9	2.42	62.8	20	2.42	62.8	x-ray
DSBB	Disulfide bond formation protein B	P0A6M2	3	75	113	64.2	3.7	88.6	4	3.7	91.8	x-ray
DSBC	Thiol:disulfide interchange protein DsbC	P0AEG6	5	100	215	91.1	2.24	106.4	5	2.24	106.4	x-ray
DSBE	Thiol:disulfide interchange protein DsbE (Cytochrome c biogenesis protein CcmG)	P0AA86	5	100	126	68.1	2.05	87.6	5	2.05	87.6	x-ray
DSBG	Thiol:disulfide interchange protein DsbG	P77202	7	87.5	228	91.9	1.98	202.6	14	1.98	123.1	x-ray
DTD	D-aminoacyl-tRNA deacylase	P0A6M4	1	100	145	100	1.55		4	1.55	194.6	x-ray
DUSC	tRNA-dihydrouridine(16) synthase (EC 1.3.1.-) (U16-specific dihydrouridine synthase) (U16-specific Dus) (tRNA-dihydrouridine synthase C)	P33371	4	80	205	65.1	2.23	174.9	7	2.11	160.2	x-ray
DUT	Deoxyuridine 5'-triphosphate nucleotidohydrolase (dUTPase) (EC 3.6.1.23) (dUTP pyrophosphatase)	P06968	10	100	135	89.4	1.73	133.2	10	1.73	133.2	x-ray
DXR	1-deoxy-D-xylulose 5-phosphate reductoisomerase (DXP reductoisomerase) (EC 1.1.1.267) (1-deoxyxylulose-5-phosphate reductoisomerase) (2-C-methyl-D-erythritol 4-phosphate synthase)	P45568	12	80	396	99.5	2.25	90.9	12	2.25	90.9	x-ray
ECO	Ecotin	P23827	10	52.6	137	84.6	2.54	74.6	10	2.54	74.6	x-ray
ECPA	Common pilus major fimbrillin subunit EcpA	Q8CWB9	2	100	155	79.5	1.94		8	2.02	129.7	x-ray
EDA	KHG/KDPG aldolase [Includes: 4-hydroxy-2-oxoglutarate aldolase (EC 4.1.3.16) (2-keto-4-hydroxyglutarate aldolase) (KHG-aldolase); 2-dehydro-3-deoxy-phosphogluconate aldolase (EC 4.1.2.14) (2-keto-3-deoxy-6-phosphogluconate aldolase) (KDPG-aldolase) (Phospho-2-dehydro-3-deoxygluconate aldolase) (Phospho-2-keto-3-deoxygluconate aldolase)]	P0A955/A0A140NB38	7	100	213	100	2.09	174.9	7	2.09	174.9	x-ray
EFEB	Deferrochelatase/peroxidase EfeB (EC 1.11.1.-)	P31545/Q8XAS4	3	75	375	88.7	2.32	318.2	8	2.23	187.1	x-ray
EFP	Elongation factor P	P0A6N4	1	100	134	71.3	2.5		3	2.5	198.8	x-ray
ELBB	Glyoxalase ElbB (EC 4.2.1.-) (Sigma cross-reacting protein 27A) (SCRP-27A)	P0ABU5	2	100	216	99.5	2.3		6	2.52	435.3	x-ray
EMRE	Multidrug transporter EmrE (Efflux-multidrug resistance protein EmrE) (Ethidium resistance protein) (Methyl viologen resistance protein C)	P23895	3	100	95	86.4	4.23	28.8	7	4.27	14.7	x-ray
EMTA	Endo-type membrane-bound lytic murein transglycosylase A (EC 4.2.2.n2) (Peptidoglycan lytic endotransglycosylase)	P0C960	5	100	183	90.1	2.17	141.2	5	2.17	141.2	x-ray
ENO	Enolase (EC 4.2.1.11) (2-phospho-D-glycerate hydro-lyase) (2-phosphoglycerate dehydratase)	P0A6P9	4	100	430	99.5	2	204.2	4	2	204.2	x-ray
ENTC	Isochorismate synthase EntC (EC 5.4.4.2) (Isochorismate mutase)	P0AEJ2/P0AEJ3	3	60	375	95.9	2.24	417.1	5	2.26	273.1	x-ray
ENTE	Enterobactin synthase component E	P10378/A0A0E1LUI6	3	75	513	95.7	2.7	512.9	8	2.8	325	x-ray
ENTF	Enterobactin synthase component F	P11454	3	75	625	48.3	2.93	284.7	3	2.93	284.7	x-ray
ENTH	Proofreading thioesterase EntH (EC 3.1.2.-) (Enterobactin synthase component H) (p15)	P0A8Y8	3	100	136	99.3	2.06	182.5	6	2.06	123.4	x-ray
ENVC	Murein hydrolase activator EnvC	P37690	1	100	130	31	1.57		4	1.57	345.6	x-ray
EPD	D-erythrose-4-phosphate dehydrogenase (E4PDH) (EC 1.2.1.72)	P0A9B6	3	100	183	54	2.54	236.1	9	2.54	128.3	x-ray
EPMA	Elongation factor P--(R)-beta-lysine ligase	P0A8N7	1	50	259	79.7	2.5		4	2.5	249.4	x-ray
EPTC	Phosphoethanolamine transferase EptC	P0CB39	3	100	357	61.9	2.27	656.3	3	2.27	656.3	x-ray
ERA	GTPase Era	P06616	2	100	292	97	2.6		4	2.6	196.2	x-ray
EUTB	Ethanolamine ammonia-lyase heavy chain (EC 4.3.1.7) (Ethanolamine ammonia-lyase large subunit)	P0AEJ6	8	100	453	100	2.11	369.4	16	2.11	319.4	x-ray
EUTC	Ethanolamine ammonia-lyase light chain (EC 4.3.1.7) (Ethanolamine ammonia-lyase small subunit)	P19636	8	100	252	85.4	2.11	211.9	13	2.12	175.2	x-ray
EUTL	Ethanolamine utilization protein EutL	P76541	2	50	214	97.7	2.26		3	2.24	268.3	x-ray
EUTM	Ethanolamine utilization protein EutM	P0ABF4	3	100	89	91.8	2.27	177.7	7	2.34	99	x-ray
EUTN	Ethanolamine utilization protein EutN	P0AEJ8/P0AEJ9	2	100	95	100	2.56		8	2.56	93.6	x-ray
EUTS	Ethanolamine utilization protein EutS	P63746	2	100	106	95.5	2.08		9	2.22	143.3	x-ray
EXBB	Biopolymer transport protein ExbB	P0ABU7	3	100	221	90.6	2.98	238.5	8	2.03	134.3	x-ray
EXBB	Biopolymer transport protein ExbB	P0ABU7	2	100	221	90.6	6.9		7	6.93	65.1	em
EXOX	Exodeoxyribonuclease 10 (EC 3.1.11.-) (Exodeoxyribonuclease X) (Exo X) (Exonuclease X)	P0AEK0	3	100	166	75.5	2.53	302.4	6	2.53	148.6	x-ray
FABA	3-hydroxydecanoyl-[acyl-carrier-protein] dehydratase (EC 4.2.1.59) (3-hydroxyacyl-[acyl-carrier-protein] dehydratase FabA) (Beta-hydroxydecanoyl thioester dehydrase) (Trans-2-decenoyl-[acyl-carrier-protein] isomerase) (EC 5.3.3.14)	P0A6Q3	3	100	164	95.3	1.97	339.4	6	1.97	216.2	x-ray
FABB	3-oxoacyl-[acyl-carrier-protein] synthase 1 (EC 2.3.1.41) (3-oxoacyl-[acyl-carrier-protein] synthase I) (Beta-ketoacyl-ACP synthase I) (KAS I)	P0A953	23	95.8	403	99.3	2.2	187.4	23	2.2	187.4	x-ray
FABD	Malonyl CoA-acyl carrier protein transacylase (MCT) (EC 2.3.1.39)	P0AAI9	5	100	305	98.7	2.04	188.2	5	2.04	188.2	x-ray
FABF	3-oxoacyl-[acyl-carrier-protein] synthase 2 (EC 2.3.1.179) (3-oxoacyl-[acyl-carrier-protein] synthase II) (Beta-ketoacyl-ACP synthase II) (KAS II)	P0AAI5	12	100	411	99.5	2.36	198.5	12	2.36	198.5	x-ray
FABG	3-oxoacyl-[acyl-carrier-protein] reductase FabG (EC 1.1.1.100) (3-ketoacyl-acyl carrier protein reductase) (Beta-Ketoacyl-acyl carrier protein reductase) (Beta-ketoacyl-ACP reductase)	P0AEK2	2	66.7	243	99.6	2.28		5	2.23	412.6	x-ray
FABH	3-oxoacyl-[acyl-carrier-protein] synthase 3 (EC 2.3.1.180) (3-oxoacyl-[acyl-carrier-protein] synthase III) (Beta-ketoacyl-ACP synthase III) (KAS III) (EcFabH)	P0A6R0/P0A6R2	12	85.7	317	100	1.88	193.4	12	1.88	193.4	x-ray
FABI	Enoyl-[acyl-carrier-protein] reductase [NADH] FabI (ENR) (EC 1.3.1.9) (NADH-dependent enoyl-ACP reductase)	P0AEK4	14	66.7	256	97.7	2.38	117.1	14	2.38	117.1	x-ray
FABZ	3-hydroxyacyl-[acyl-carrier-protein] dehydratase FabZ	B7MBG1	1	100	143	94.7	2.5		6	2.5	194.6	x-ray
FADL	Long-chain fatty acid transport protein (Outer membrane FadL protein) (Outer membrane flp protein)	P10384	8	57.1	421	94.4	2.83	136.3	8	2.83	136.3	x-ray
FADM	Long-chain acyl-CoA thioesterase FadM	P77712	1	100	132	100	1.9		4	1.9	277.5	x-ray
FADR	Fatty acid metabolism regulator protein	P0A8V6	5	100	221	92.5	2.42	93.7	5	2.42	93.7	x-ray
FBAA	Fructose-bisphosphate aldolase class 2 (FBP aldolase) (FBPA) (EC 4.1.2.13) (Fructose-1,6-bisphosphate aldolase) (Fructose-bisphosphate aldolase class II)	P0AB71	9	90	175	48.7	1.98	194.1	9	1.98	194.1	x-ray
FBP	Fructose-1,6-bisphosphatase class 1 (FBPase class 1) (EC 3.1.3.11) (D-fructose-1,6-bisphosphate 1-phosphohydrolase class 1)	P0A993	5	100	265	79.8	2.01	215.7	5	2.01	215.7	x-ray
FCL	GDP-L-fucose synthase (EC 1.1.1.271) (GDP-4-keto-6-deoxy-D-mannose-3,5-epimerase-4-reductase)	P32055	8	100	314	97.8	1.88	218.2	8	1.88	218.2	x-ray
FDHF	Formate dehydrogenase H (EC 1.1.99.33) (EC 1.2.1.2) (Formate dehydrogenase-H subunit alpha) (FDH-H) (Formate-hydrogen-lyase-linked, selenocysteine-containing polypeptide)	P07658	4	100	657	91.9	2.57	220.6	4	2.57	220.6	x-ray
FDX	2Fe-2S ferredoxin	P0A9R4	1	100	108	97.3	1.7		3	1.7	321	x-ray
FECA	Fe(3+) dicitrate transport protein FecA (Iron(III) dicitrate transport protein FecA)	P13036	5	100	647	83.6	2.51	158.6	5	2.51	158.6	x-ray
FEOB	Fe(2+) transporter FeoB (Ferrous iron transport protein B)	P33650/J7QA66	5	55.6	259	33.5	2.6	123.4	10	2.57	97.1	x-ray
FEPB	Ferrienterobactin-binding periplasmic protein	P0AEL6	1	100	291	91.5	1.85		3	1.85	510.9	x-ray
FFH	Signal recognition particle protein	P0AGD7	2	12.5	290	64	3.27		4	3.27	142.8	x-ray
FFH	Signal recognition particle protein	P0AGD7	4	50	290	64	5.58	34.9	4	5.58	34.9	em
FHUA	Ferrichrome outer membrane transporter/phage receptor	P06971	11	100	383	51.3	2.75	149.4	12	2.8	147.9	x-ray
FHUD	Iron(3+)-hydroxamate-binding protein FhuD (Ferric hydroxamate uptake protein D) (Ferrichrome-binding periplasmic protein) (Iron(III)-hydroxamate-binding protein FhuD)	P07822	4	100	260	87.8	2.12	286.7	4	2.12	286.7	x-ray
FIC	Probable adenosine monophosphate-protein transferase fic	P20605	2	100	107	53.5	2.2		5	2.24	153.3	x-ray
FIEF	Ferrous-iron efflux pump FieF	P69380	2	100	283	94.3	3.35		6	3.2	72.2	x-ray
FIMA	Type-1 fimbrial protein, A chain	P04128	2	100	154	84.6	4.2		8	4.2	221.7	em
FIMC	Chaperone protein FimC	P31697	5	50	177	73.4	2.65	117.4	8	2.73	123.2	x-ray
FIMD	Outer membrane usher protein FimD	P30130	2	40	331	37.7	3.3		3	3.13	202.5	x-ray
FIMF	Protein FimF	P08189	3	33.3	115	65.3	2.75	152.5	6	2	84	x-ray
FIMG	Protein FimG	P08190	7	70	132	79	1.92	111.6	7	1.92	111.6	x-ray
FIMH	Type 1 fimbrin D-mannose specific adhesin (Protein FimH)	P08191	9	15.8	279	93	2.56	34.1	9	2.56	34.1	x-ray
FIS	DNA-binding protein Fis (Factor-for-inversion stimulation protein) (Hin recombinational enhancer-binding protein)	P0A6R3	18	58.1	89	90.8	2.91	108.4	18	2.91	108.4	x-ray
FIU	Catecholate siderophore receptor Fiu	P75780	2	66.7	711	93.6	2.7		6	2.77	252.1	x-ray
FKPA	FKBP-type peptidyl-prolyl cis-trans isomerase FkpA (PPIase) (EC 5.2.1.8) (Rotamase)	P45523	3	75	210	77.8	2.22	210.9	5	2.18	104	x-ray
FLDA	Flavodoxin 1	P61949	2	100	169	96	2.2		3	2.07	273.1	x-ray
FLHD	Flagellar transcriptional regulator FlhD	P0A8S9	3	100	79	68.1	2.57	98.2	6	2.57	75.7	x-ray
FLID	Flagellar hook-associated protein 2	P24216	1	50	242	51.7	3		5	3	533.3	x-ray
FMT	Methionyl-tRNA formyltransferase (EC 2.1.2.9)	P23882	2	100	269	85.4	2.4		4	2.4	151.3	x-ray
FOCA	Probable formate transporter 1	P0AC25	2	100	247	86.7	2.72		13	2.9	113	x-ray
FOLA	Dihydrofolate reductase (EC 1.5.1.3)	P0ABQ4	78	87.6	159	100	1.97	79.6	78	1.97	79.6	x-ray
FOLD	Bifunctional protein FolD [Includes: Methylenetetrahydrofolate dehydrogenase (EC 1.5.1.5); Methenyltetrahydrofolate cyclohydrolase (EC 3.5.4.9)]	P24186	4	100	284	98.6	2.11	153.3	6	2.04	128.9	x-ray
FOLE	GTP cyclohydrolase 1 (EC 3.5.4.16) (GTP cyclohydrolase I) (GTP-CH-I)	P0A6T5	7	100	221	99.5	2.76	119.9	7	2.76	119.9	x-ray
FOLK	2-amino-4-hydroxy-6-hydroxymethyldihydropteridine pyrophosphokinase (EC 2.7.6.3) (6-hydroxymethyl-7,8-dihydropterin pyrophosphokinase) (PPPK) (7,8-dihydro-6-hydroxymethylpterin-pyrophosphokinase) (HPPK)	P26281	45	84.9	158	99.4	1.44	73.2	45	1.44	73.2	x-ray
FOLP	Dihydropteroate synthase (DHPS) (EC 2.5.1.15) (Dihydropteroate pyrophosphorylase)	P0AC13	3	100	282	100	2	347.6	3	2	347.6	x-ray
FOLX	Dihydroneopterin triphosphate 2'-epimerase (EC 5.1.99.-) (D-erythro-7,8-dihydroneopterin triphosphate epimerase)	P0AC19	1	100	119	99.2	2.9		8	2.9	285	x-ray
FPR	Flavodoxin/ferredoxin--NADP reductase	P28861	2	100	162	65.3	1.8		3	1.83	516.6	x-ray
FRC	Formyl-CoA:oxalate CoA-transferase (FCOCT) (EC 2.8.3.16) (Formyl-coenzyme A transferase) (Formyl-CoA transferase)	P69902	4	66.7	415	99.8	2	311.5	7	2	292.5	x-ray
FRDA	Fumarate reductase flavoprotein subunit (EC 1.3.5.4)	P00363	10	76.9	577	95.8	3.24	161	10	3.24	161	x-ray
FRDB	Fumarate reductase iron-sulfur subunit (EC 1.3.5.1)	P0AC47/P0AC49	11	100	243	99.6	3.27	144.3	11	3.27	144.3	x-ray
FRDC	Fumarate reductase subunit C (Fumarate reductase 15 kDa hydrophobic protein)	P0A8Q0/B7MKV9	12	100	130	99.2	3.28	130.8	12	3.28	130.8	x-ray
FRDD	Fumarate reductase subunit D (Fumarate reductase 13 kDa hydrophobic protein)	P0A8Q3	11	100	119	100	3.27	110.1	11	3.27	110.1	x-ray
FRE	NAD(P)H-flavin reductase	P0AEN1	1	100	161	69.1	2.2		4	2.2	170.9	x-ray
FRMR	Transcriptional repressor FrmR	Q8X5J3	1	100	83	91.2	2.7		4	2.7	109.5	x-ray
FRR	Ribosome-recycling factor (RRF) (Ribosome-releasing factor)	P0A805	5	83.3	182	98.4	2.76	47.3	5	2.76	47.3	x-ray
FRR	Ribosome-recycling factor (RRF) (Ribosome-releasing factor)	P0A805	3	100	182	98.4	12.9	443.2	3	12.9	443.2	em
FSAA	Fructose-6-phosphate aldolase 1 (EC 4.1.2.-) (Fructose-6-phosphate aldolase A) (FSAA)	P78055	6	100	219	99.5	2.11	199.1	12	2.11	178.4	x-ray
FTNA	Bacterial non-heme ferritin (EC 1.16.3.2) (Ferritin-1)	P0A998	4	100	161	97.6	2.16	228.3	12	2.16	175.2	x-ray
FTSP	Cell division protein FtsP	P26648	2	100	266	56.6	2.26		3	2.37	256.4	x-ray
FTSQ	Cell division protein FtsQ	P06136/J7Q602	3	75	203	73.6	2.77	136.6	3	2.77	136.6	x-ray
FTSY	Signal recognition particle receptor FtsY (SRP receptor)	P10121	9	69.2	280	56.3	2.02	99.1	9	2.02	99.1	x-ray
FUCA	L-fuculose phosphate aldolase (EC 4.1.2.17) (L-fuculose-1-phosphate aldolase)	P0AB87	16	94.1	206	95.8	2.15	169.1	16	2.15	169.1	x-ray
FUCI	L-fucose isomerase (FucIase) (EC 5.3.1.25) (6-deoxy-L-galactose isomerase) (D-arabinose isomerase) (EC 5.3.1.3)	P69922	1	100	591	100	2.5		6	2.5	1099.4	x-ray
FUCO	Lactaldehyde reductase (EC 1.1.1.77) (Propanediol oxidoreductase)	P0A9S1	4	100	382	100	2.05	226.7	4	2.05	226.7	x-ray
FUCU	L-fucose mutarotase (EC 5.1.3.29) (Fucose 1-epimerase) (Type-2 mutarotase)	P0AEN8	1	100	140	100	1.9		7	1.9	123.5	x-ray
FUMC	Fumarate hydratase class II (Fumarase C) (EC 4.2.1.2) (Aerobic fumarase) (Iron-independent fumarase)	P05042	7	100	455	97.4	2.17	324.2	7	2.17	324.2	x-ray
FUSA	Elongation factor G (EF-G)	P0A6M8	2	100	653	92.8	2.9		8	2.9	202.1	x-ray
FUSA	Elongation factor G (EF-G)	P0A6M8	6	100	635	90.2	6.77	33.4	6	6.77	33.4	em
GABD	Succinate-semialdehyde dehydrogenase [NADP(+)] GabD (SSDH) (EC 1.2.1.79)	P25526	1	100	481	99.8	2.3		4	2.3	1174.7	x-ray
GABT	4-aminobutyrate aminotransferase GabT (EC 2.6.1.19) ((S)-3-amino-2-methylpropionate transaminase) (EC 2.6.1.22) (GABA aminotransferase) (GABA-AT) (Gamma-amino-N-butyrate transaminase) (GABA transaminase) (Glutamate:succinic semialdehyde transaminase) (L-AIBAT)	P22256	5	100	425	99.8	2.29	510	15	2.29	289.9	x-ray
GADB	Glutamate decarboxylase beta (GAD-beta) (EC 4.1.1.15)	P69910	8	100	424	91	2.45	181.9	16	2.45	169.7	x-ray
GALE	UDP-glucose 4-epimerase (EC 5.1.3.2) (Galactowaldenase) (UDP-galactose 4-epimerase)	P09147	18	100	338	100	1.85	184.1	18	1.85	184.1	x-ray
GALT	Galactose-1-phosphate uridylyltransferase (Gal-1-P uridylyltransferase) (EC 2.7.7.12) (UDP-glucose--hexose-1-phosphate uridylyltransferase)	P09148	4	100	301	86.5	1.82	237.8	8	1.82	185.8	x-ray
GAPA	Glyceraldehyde-3-phosphate dehydrogenase A (GAPDH-A) (EC 1.2.1.12) (NAD-dependent glyceraldehyde-3-phosphate dehydrogenase)	P0A9B2	9	69.2	330	99.7	2.01	150.1	9	2.01	150.1	x-ray
GARL	5-keto-4-deoxy-D-glucarate aldolase (KDGluc aldolase) (KDGlucA) (EC 4.1.2.20) (2-dehydro-3-deoxy-D-glucarate aldolase) (2-keto-3-deoxy-D-glucarate aldolase) (5-dehydro-4-deoxy-D-glucarate aldolase) (Alpha-keto-beta-deoxy-D-glucarate aldolase)	P23522	2	100	253	98.8	2.2		4	2.2	356.6	x-ray
GATD	Galactitol 1-phosphate 5-dehydrogenase (EC 1.1.1.251)	P0A9S3	4	100	346	100	1.88	171.1	4	1.88	171.1	x-ray
GCL	Glyoxylate carboligase (EC 4.1.1.47) (Tartronate-semialdehyde synthase)	P0AEP7	1	100	592	99.8	2.7		6	2.7	3319.8	x-ray
GCVH	Glycine cleavage system H protein	P0A6T9	6	100	126	97.7	2	92	6	2	92	x-ray
GCVT	Aminomethyltransferase (EC 2.1.2.10) (Glycine cleavage system T protein)	P27248	4	100	361	99.2	1.91	281.7	9	1.95	189	x-ray
GDHA	NADP-specific glutamate dehydrogenase (NADP-GDH) (EC 1.4.1.4)	P00370	2	66.7	442	98.9	2.85		7	2.7	123.9	x-ray
GFCC	Uncharacterized protein	B7UN63	1	100	224	90.3	1.91		4	1.91	197.5	x-ray
GGT	Gamma-glutamyltranspeptidase (EC 2.3.2.2) (Glutathione hydrolase) (EC 3.4.19.13) [Cleaved into: Gamma-glutamyltranspeptidase large chain; Gamma-glutamyltranspeptidase small chain]	P18956	10	90.9	349	60.2	1.81	305.1	10	1.81	305.1	x-ray
GLCB	Malate synthase G	P37330	2	100	412	57	1.98		3	1.97	310.4	x-ray
GLDA	Glycerol dehydrogenase	P0A9S5	1	100	367	100	2.79		4	2.79	384.5	x-ray
GLGA	Glycogen synthase (EC 2.4.1.21) (Starch [bacterial glycogen] synthase)	P0A6U8	7	100	475	99.6	2.46	175.4	7	2.46	175.4	x-ray
GLGC	Glucose-1-phosphate adenylyltransferase (EC 2.7.7.27) (ADP-glucose pyrophosphorylase) (ADPGlc PPase) (ADP-glucose synthase)	P0A6V1	3	100	314	72.9	2.93	397.6	9	2.93	191.3	x-ray
GLK	Glucokinase	P0A6V9	2	100	319	99.4	2.28		4	2.28	131.1	x-ray
GLMS	Glutamine--fructose-6-phosphate aminotransferase [isomerizing] (EC 2.6.1.16) (D-fructose-6-phosphate amidotransferase) (GFAT) (Glucosamine-6-phosphate synthase) (Hexosephosphate aminotransferase) (L-glutamine--D-fructose-6-phosphate amidotransferase)	P17169	9	81.8	359	58.9	2.37	99.9	9	2.37	99.9	x-ray
GLMU	Bifunctional protein GlmU [Includes: UDP-N-acetylglucosamine pyrophosphorylase (EC 2.7.7.23) (N-acetylglucosamine-1-phosphate uridyltransferase); Glucosamine-1-phosphate N-acetyltransferase (EC 2.3.1.157)]	P0ACC7	6	75	323	70.8	2.27	152.6	6	2.27	152.6	x-ray
GLNH	Glutamine-binding periplasmic protein	P0AEQ3	2	100	220	88.7	2.12		3	2.18	96.1	x-ray
GLNK	Nitrogen regulatory protein P-II 2	P0AC55	3	75	112	100	2.15	138.1	8	2.37	93.7	x-ray
GLNS	Glutamine--tRNA ligase (EC 6.1.1.18) (Glutaminyl-tRNA synthetase) (GlnRS)	P00962/A0A140NAB7	18	94.4	432	78	2.63	177.9	18	2.63	177.9	x-ray
GLOA	Lactoylglutathione lyase (EC 4.4.1.5) (Aldoketomutase) (Glyoxalase I) (Glx I) (Ketone-aldehyde mutase) (Methylglyoxalase) (S-D-lactoylglutathione methylglyoxal lyase)	P0AC81	5	100	126	93.3	1.76	288	5	1.76	288	x-ray
GLPD	Aerobic glycerol-3-phosphate dehydrogenase (EC 1.1.5.3)	P13035	5	100	494	98.6	2.04	369.3	5	2.04	369.3	x-ray
GLPF	Glycerol uptake facilitator protein (Aquaglyceroporin)	P0AER0	4	100	254	90.4	2.45	340.4	4	2.45	340.4	x-ray
GLPG	Rhomboid protease GlpG (EC 3.4.21.105) (Intramembrane serine protease)	P09391(U6NA71)	23	67.6	178	64.5	2.2	83.2	23	2.2	83.2	x-ray
GLPQ	Glycerophosphodiester phosphodiesterase, periplasmic (Glycerophosphoryl diester phosphodiesterase, periplasmic) (EC 3.1.4.46)	P09394	2	100	327	91.3	1.85		6	1.9	267.4	x-ray
GLPX	Fructose-1,6-bisphosphatase 1 class 2 (FBPase 1 class 2) (EC 3.1.3.11) (D-fructose-1,6-bisphosphate 1-phosphohydrolase 1 class 2)	P0A9C9	4	80	238	70.8	2.03	361.2	4	2.03	361.2	x-ray
GLSA1	Glutaminase 1	P77454	1	100	309	99.7	1.61		4	1.61	604.6	x-ray
GLTA	Citrate synthase (EC 2.3.3.16)	P0ABH7	9	100	426	99.8	2.27	130.3	9	2.27	130.3	x-ray
GLYA	Serine hydroxymethyltransferase (SHMT) (Serine methylase) (EC 2.1.2.1)	P0A825	3	100	416	99.8	2.8	169.1	5	2.7	173.1	x-ray
GMHB	D-glycero-beta-D-manno-heptose-1,7-bisphosphate 7-phosphatase (EC 3.1.3.82) (D,D-heptose 1,7-bisphosphate phosphatase) (HBP phosphatase)	P63228	8	100	182	95.3	1.83	190.3	8	1.83	190.3	x-ray
GMK	Guanylate kinase (EC 2.7.4.8) (GMP kinase)	P60546	5	83.3	203	98.1	2.72	78.7	5	2.72	78.7	x-ray
GMM	GDP-mannose mannosyl hydrolase (GDPMH) (EC 3.6.1.-) (Colanic acid biosynthesis protein WcaH)	P32056	4	80	148	93.1	1.58	192.3	9	1.66	137	x-ray
GND	6-phosphogluconate dehydrogenase, decarboxylating (EC 1.1.1.44)	P00350	3	100	464	99.1	1.53	572.3	6	1.53	224.1	x-ray
GNSA	Protein GnsA	P0AC92	2	100	56	98.2	1.88		3	1.9	337.7	x-ray
GNTK	Thermoresistant gluconokinase (EC 2.7.1.12) (Gluconate kinase 2)	P46859	4	66.7	171	97.7	2.37	117	7	2.51	93.8	x-ray
GOR	Glutathione reductase (GR) (GRase) (EC 1.8.1.7)	P06715	4	100	448	99.6	1.95	407.6	8	1.95	279.3	x-ray
GPR	L-glyceraldehyde 3-phosphate reductase (GAP reductase) (EC 1.1.1.-)	Q46851	3	100	229	66.2	2.08	571.5	9	2.08	367.7	x-ray
GPT	Xanthine phosphoribosyltransferase (EC 2.4.2.22) (Xanthine-guanine phosphoribosyltransferase) (XGPRT)	P0A9M5(H0Q6L9)	4	57.1	148	97.4	2.35	257	9	2.4	168.6	x-ray
GREB	Transcription elongation factor GreB (Transcript cleavage factor GreB)	P30128	1	100	156	98.7	2.6		6	2.6	907.9	x-ray
GROL	60 kDa chaperonin (GroEL protein) (Protein Cpn60)	P0A6F5	20	64.5	518	94.5	3.02	42.4	20	3.02	42.4	x-ray
GROL	60 kDa chaperonin (GroEL protein) (Protein Cpn60)	P0A6F5	17	94.4	518	94.5	8.73	18.5	17	8.73	18.5	em
GROS	10 kDa chaperonin (GroES protein) (Protein Cpn10)	P0A6F9	6	85.7	97	100	3.07	92.3	22	3.2	71	x-ray
GROS	10 kDa chaperonin (GroES protein) (Protein Cpn10)	P0A6F9	4	66.7	97	100	11.6	125.7	12	11.6	86.1	em
GSHA	Glutamate--cysteine ligase (EC 6.3.2.2) (Gamma-ECS) (GCS) (Gamma-glutamylcysteine synthetase)	P0A6W9	4	100	244	47.1	2.4	242.1	4	2.4	242.1	x-ray
GSHB	Glutathione synthetase	P04425	4	100	163	51.6	2.23	245.2	4	2.23	245.2	x-ray
GSS	Bifunctional glutathionylspermidine synthetase/amidase (GspSA) [Includes: Glutathionylspermidine amidase (Gsp amidase) (EC 3.5.1.78) (Glutathionylspermidine amidohydrolase [spermidine-forming]); Glutathionylspermidine synthetase (Gsp synthetase) (EC 6.3.1.8) (Glutathione:spermidine ligase [ADP-forming]) (Gsp synthase)]	P0AES0	6	66.7	379	61.2	2.47	131.4	6	2.47	131.4	x-ray
GSTA	Glutathione S-transferase GstA	P0A9D2	2	100	201	100	2		3	2.03	305.5	x-ray
GUAA	GMP synthase [glutamine-hydrolyzing]	P04079	1	100	341	65	2.2		4	2.2	248.3	x-ray
GUAD	Guanine deaminase	P76641	2	100	338	77	2.3		8	2.3	205.7	x-ray
GUDD	Glucarate dehydratase (GDH) (GlucD) (EC 4.2.1.40)	P0AES2	8	88.9	441	98.9	2.12	235.8	8	2.12	235.8	x-ray
GUDX	Glucarate dehydratase-related protein (GDH-RP) (GlucDRP) (EC 4.2.1.-)	Q46915	2	100	439	98.4	2.45		5	2.66	271.8	x-ray
GYRA	DNA gyrase subunit A	P0AES4/P0AES5	2	28.6	385	44	2.96		6	3.07	148.8	x-ray
GYRB	DNA gyrase subunit B (EC 5.99.1.3) (Type IIA topoisomerase subunit GyrB)	P0AES6	8	32	298	37.1	2	161	8	2	161	x-ray
HCHA	Protein deglycase 1 (EC 3.1.2.-) (EC 3.5.1.124) (Glyoxalase III) (EC 4.2.1.130) (Holding molecular chaperone) (Hsp31)	P31658	5	100	276	97.5	2.32	164.5	5	2.32	164.5	x-ray
HDA	DnaA regulatory inactivator Hda	P69933	1	100	176	75.5	3.24		3	3.24	497	x-ray
HDEA	Acid stress chaperone HdeA (10K-S protein)	P0AES9	2	100	76	69.1	2.1		9	2.07	86.2	x-ray
HDEB	Acid stress chaperone HdeB	P0AET2	1	100	69	63.9	1.5		4	1.5	146.5	x-ray
HDHA	7-alpha-hydroxysteroid dehydrogenase (7-alpha-HSDH) (EC 1.1.1.159)	P0AET8	3	100	253	99.2	2.13	375.6	6	2.13	215.6	x-ray
HEMB	Delta-aminolevulinic acid dehydratase (ALAD) (ALADH) (EC 4.2.1.24) (Porphobilinogen synthase)	P0ACB2	5	100	323	99.7	1.92	176.2	5	1.92	176.2	x-ray
HEMC	Porphobilinogen deaminase (PBG) (EC 2.5.1.61) (Hydroxymethylbilane synthase) (HMBS) (Pre-uroporphyrinogen synthase)	P06983	5	100	247	78.9	2.08	238.7	5	2.08	238.7	x-ray
HFQ	RNA-binding protein Hfq (HF-1) (Host factor-I protein) (HF-I)	P0A6X3	15	100	60	58.8	2.28	90.2	15	2.28	90.2	x-ray
HIGA	Antitoxin HigA	P67701	2	66.7	110	79.7	2.55		3	2.73	114.5	x-ray
HINT	Purine nucleoside phosphoramidase (EC 3.9.1.-) (Histidine triad nucleotide binding protein HinT) (HIT protein)	P0ACE7	2	100	112	94.1	1.59		8	1.59	159.2	x-ray
HIPA	Serine/threonine-protein kinase HipA (Ser/Thr-protein kinase HipA) (EC 2.7.11.1) (Toxin HipA)	P23874	12	92.3	240	54.5	2.53	93.1	12	2.53	93.1	x-ray
HIPB	Antitoxin HipB	P23873	12	100	68	77.3	2.84	78.2	18	2.96	68.2	x-ray
HISB	Histidine biosynthesis bifunctional protein HisB	Q9S5G5	5	100	113	31.8	1.85	210.2	7	1.89	194	x-ray
HISC	Histidinol-phosphate aminotransferase (EC 2.6.1.9) (Imidazole acetol-phosphate transaminase) (HPAT) (HspAT)	P06986	6	100	320	89.9	2.07	267.5	6	2.07	267.5	x-ray
HISD	Histidinol dehydrogenase (HDH) (EC 1.1.1.23)	P06988	4	100	431	99.3	1.91	323.8	4	1.91	323.8	x-ray
HISJ	Histidine-binding periplasmic protein	P0AEU0/P02910	2	100	238	91.5	2.2		3	2.09	212.2	x-ray
HISS	Histidine--tRNA ligase	P60906	4	100	174	41	2.68	201	10	2.68	158.9	x-ray
HIUH	5-hydroxyisourate hydrolase (HIU hydrolase) (HIUHase) (EC 3.5.2.17) (Transthyretin-like protein) (TLP) (Transthyretin-related protein) (TRP)	P76341	3	100	111	81	1.85	348	12	1.85	154.7	x-ray
HLDD	ADP-L-glycero-D-manno-heptose-6-epimerase (EC 5.1.3.20) (ADP-L-glycero-beta-D-manno-heptose-6-epimerase) (ADP-glyceromanno-heptose 6-epimerase) (ADP-hep 6-epimerase) (AGME)	P67910/P67911	3	100	307	99	2.39	444.5	9	2.39	256.1	x-ray
HLYE	Hemolysin E, chromosomal (Cytotoxin ClyA) (Hemolysis-inducing protein) (Latent pore-forming 34 kDa hemolysin) (Silent hemolysin SheA)	P77335	4	100	285	94.1	2.34	42.4	4	2.34	42.4	x-ray
HLYE	Hemolysin E, chromosomal (Cytotoxin ClyA) (Hemolysis-inducing protein) (Latent pore-forming 34 kDa hemolysin) (Silent hemolysin SheA)	P77335	3	100	285	94.1	3.43	276.9	9	3.43	277.1	em
HOLA	DNA polymerase III subunit delta (EC 2.7.7.7)	P28630	6	66.7	333	97.1	3.4	58.3	6	3.4	58.3	x-ray
HOLB	DNA polymerase III subunit delta' (EC 2.7.7.7)	P28631	6	75	334	100	3.4	85.6	6	3.4	85.6	x-ray
HOLC	DNA polymerase III subunit chi	P28905	2	100	146	99.3	1.98		3	2.02	285.6	x-ray
HOLD	DNA polymerase III subunit psi	P28632	2	66.7	102	74.5	1.98		3	2.02	182	x-ray
HPF	Ribosome hibernation promoting factor	P0AFX0	2	100	95	100	5.45		3	6.27	63240.2	em
HPT	Hypoxanthine phosphoribosyltransferase (HPRT) (EC 2.4.2.8)	P0A9M2	9	100	99	55.6	2.75	127.2	9	2.75	127.2	x-ray
HSCB	Co-chaperone protein HscB	P0A6L9	1	100	127	74.3	1.8		3	1.8	146.3	x-ray
HSDM	Type I restriction enzyme EcoKI M protein	P08957	2	100	529	100	18		4	18	365.1	em
HSLO	33 kDa chaperonin (Heat shock protein 33) (HSP33)	P0A6Y5	3	100	227	77.7	2.6	98.6	3	2.6	98.6	x-ray
HSLU	ATP-dependent protease ATPase subunit HslU (Heat shock protein HslU) (Unfoldase HslU)	P0A6H5	9	81.8	224	50.6	3.6	117.4	9	3.6	117.4	x-ray
HSLV	ATP-dependent protease subunit HslV (EC 3.4.25.2) (Heat shock protein HslV)	P0A7B8/B7LA29	9	90	172	97.7	3.48	83.1	9	3.48	83.1	x-ray
HTPG	Chaperone protein HtpG (Heat shock protein C62.5) (Heat shock protein HtpG) (High temperature protein G)	P0A6Z3	4	57.1	364	58.3	3.21	68.1	4	3.21	68.1	x-ray
HUPA	DNA-binding protein HU-alpha	P0ACF0	8	100	54	60	2.89	122.1	12	3	112.8	x-ray
HUPB	DNA-binding protein HU-beta	P0ACF4	3	75	54	60	2.28	354.2	3	2.28	354.2	x-ray
HYAA	Hydrogenase-1 small chain (HYD1) (EC 1.12.99.6) (Membrane-bound hydrogenase 1 small subunit) (NiFe hydrogenase)	P69739	12	92.3	263	70.7	1.6	214.5	12	1.6	214.5	x-ray
HYAB	Hydrogenase-1 large chain (HYD1) (EC 1.12.99.6) (Membrane-bound hydrogenase 1 large subunit) (NiFe hydrogenase)	P0ACD8	11	100	581	97.3	1.59	197.5	11	1.59	197.5	x-ray
HYBC	Hydrogenase-2 large chain	P0ACE0/P0ACE1	6	100	551	97.2	1.65	377	12	1.65	348.3	x-ray
HYBD	Hydrogenase 2 maturation protease (EC 3.4.23.-)	P37182	1	100	159	97	2.2		6	2.2	823.7	x-ray
HYBO	Hydrogenase-2 small chain	P69741/B7LGE4	6	100	267	71.8	1.65	332.2	12	1.65	306.9	x-ray
HYPE	Hydrogenase isoenzymes formation protein HypE	P24193/A0A0H3JHA1	2	100	288	85.7	2.26		5	2.1	329.6	x-ray
HYPF	Carbamoyltransferase HypF	A0A0H3JHT3	6	100	646	86.1	2.06	269	6	2.06	269	x-ray
IAAA	Isoaspartyl peptidase (EC 3.4.19.5) (Beta-aspartyl-peptidase) (EcAIII) (Isoaspartyl dipeptidase) [Cleaved into: Isoaspartyl peptidase subunit alpha; Isoaspartyl peptidase subunit beta]	P37595	6	100	156	48.6	1.91	193.6	11	1.93	175.3	x-ray
IADA	Isoaspartyl dipeptidase (EC 3.4.19.-)	P39377	8	100	288	73.8	2.21	184.6	15	2.17	177.4	x-ray
IADA	Isoaspartyl dipeptidase	P39377	1	100	288	73.8	10.5		8	10.5	1413.4	em
ICD	Isocitrate dehydrogenase [NADP] (IDH) (EC 1.1.1.42) (IDP) (NADP(+)-specific ICDH) (Oxalosuccinate decarboxylase)	P08200	35	100	414	99.5	2.3	95.2	35	2.3	95.2	x-ray
ICLR	Transcriptional repressor IclR (Acetate operon repressor)	P16528	3	100	176	64.2	1.93	195.5	6	1.93	108.8	x-ray
IDI	Isopentenyl-diphosphate Delta-isomerase (IPP isomerase) (EC 5.3.3.2) (IPP:DMAPP isomerase) (Isopentenyl pyrophosphate isomerase)	Q46822	16	88.9	175	96.2	1.87	151.9	16	1.87	151.9	x-ray
IDND	L-idonate 5-dehydrogenase (NAD(P)(+))	P39346	1	100	343	100	2.61		4	2.61	280.4	x-ray
IHFA	Integration host factor subunit alpha (IHF-alpha)	P0A6X7	7	100	92	92.9	2.3	205.2	7	2.3	205.2	x-ray
IHFB	Integration host factor subunit beta (IHF-beta)	P0A6Y1	5	71.4	93	98.9	2.19	269.4	5	2.19	269.4	x-ray
INFB	Translation initiation factor IF-2	P0A705	5	100	495	55.6	9.82	83.9	5	9.82	83.9	em
ILVC	Ketol-acid reductoisomerase (NADP(+)) (KARI) (EC 1.1.1.86) (Acetohydroxy-acid isomeroreductase) (AHIR) (Alpha-keto-beta-hydroxylacyl reductoisomerase) (Ketol-acid reductoisomerase type 2) (Ketol-acid reductoisomerase type II)	P05793	2	100	397	80.9	2.45		6	2.5	171.2	x-ray
ILVE	Branched-chain-amino-acid aminotransferase (BCAT) (EC 2.6.1.42) (Transaminase B)	P0AB80	6	100	170	55	2.23	189.2	6	2.23	189.2	x-ray
ILVN	Acetolactate synthase isozyme 1 small subunit	P0ADF8/P0ADG0	4	100	90	93.8	2.15	161.9	13	2.09	104.8	x-ray
ISCA	Iron-binding protein IscA (Iron-sulfur cluster assembly protein)	P0AAC8	3	100	96	89.7	2.42	158.2	6	2.42	96.6	x-ray
ISCR	HTH-type transcriptional regulator IscR	P0AGK8/C3SZN7	4	100	83	51.2	2.4	151.9	8	2.4	109.2	x-ray
ISCS	Cysteine desulfurase IscS	P0A6B7/P0A6B9	5	100	325	80.4	2.4	240.8	8	2.33	234.8	x-ray
ISPA	Farnesyl diphosphate synthase (FPP synthase) (EC 2.5.1.10) ((2E,6E)-farnesyl diphosphate synthase) (Geranyltranstransferase)	P22939	2	100	298	99.7	2.19		4	2.19	362.9	x-ray
ISPD	2-C-methyl-D-erythritol 4-phosphate cytidylyltransferase (EC 2.7.7.60) (4-diphosphocytidyl-2C-methyl-D-erythritol synthase) (CDP-ME synthase) (MEP cytidylyltransferase) (MCT)	Q46893	7	100	202	85.6	1.97	113.2	7	1.97	113.2	x-ray
ISPE	4-diphosphocytidyl-2-C-methyl-D-erythritol kinase	P62615/Q8FI04	2	100	282	99.6	2.01		4	2.01	209.2	x-ray
ISPF	2-C-methyl-D-erythritol 2,4-cyclodiphosphate synthase (MECDP-synthase) (MECPP-synthase) (MECPS) (EC 4.6.1.12)	P62617	18	100	155	97.5	2.6	106.8	18	2.6	106.8	x-ray
ISPH	4-hydroxy-3-methylbut-2-enyl diphosphate reductase (EC 1.17.7.4)	P62623	24	100	309	97.8	1.74	235.8	24	1.74	235.8	x-ray
ISPU	Ditrans,polycis-undecaprenyl-diphosphate synthase ((2E,6E)-farnesyl-diphosphate specific)	P60472	10	37	222	87.7	1.92	98.7	10	1.92	98.7	x-ray
IVY	Inhibitor of vertebrate lysozyme	P0AD59	2	100	126	80.3	1.59		4	1.59	127	x-ray
KATE	Catalase HPII (EC 1.11.1.6) (Hydroxyperoxidase II)	P21179	41	95.3	726	96.4	1.89	241.8	41	1.89	241.8	x-ray
KATG	Catalase-peroxidase (CP) (EC 1.11.1.21) (Hydroperoxidase I) (HPI) (Peroxidase/catalase)	P13029	3	100	292	40.2	2.2	169	5	2	129.5	x-ray
KDPE	KDP operon transcriptional regulatory protein KdpE	P21866	5	83.3	116	51.6	2.37	105.4	5	2.37	105.4	x-ray
KDPF	Potassium-transporting ATPase KdpF subunit	P36937	1	100	27	93.1	2.9		3	2.9	994.8	x-ray
KDSA	2-dehydro-3-deoxyphosphooctonate aldolase (EC 2.5.1.55) (3-deoxy-D-manno-octulosonic acid 8-phosphate synthase) (KDO-8-phosphate synthase) (KDO 8-P synthase) (KDOPS) (Phospho-2-dehydro-3-deoxyoctonate aldolase)	P0A715	10	100	205	72.2	2.64	94.4	10	2.64	94.4	x-ray
KDSB	3-deoxy-manno-octulosonate cytidylyltransferase (EC 2.7.7.38) (CMP-2-keto-3-deoxyoctulosonic acid synthase) (CKS) (CMP-KDO synthase)	P04951	3	100	171	69	2.34	121.7	6	2.34	92.9	x-ray
KDSC	3-deoxy-D-manno-octulosonate 8-phosphate phosphatase KdsC	P67653	6	100	173	92	2.25	186.3	18	2.25	156.5	x-ray
KDSD	Arabinose 5-phosphate isomerase KdsD	P45395	1	100	172	52.4	2.6		4	2.6	254.9	x-ray
KDUI	4-deoxy-L-threo-5-hexosulose-uronate ketol-isomerase (EC 5.3.1.17) (5-keto-4-deoxyuronate isomerase) (DKI isomerase)	Q46938	2	100	191	68.7	2.27		4	2.27	368.5	x-ray
KEFC	Glutathione-regulated potassium-efflux system protein KefC	P03819	3	100	161	26	2.08	330.8	6	2.08	171.9	x-ray
KEFF	Glutathione-regulated potassium-efflux system ancillary protein KefF (Quinone oxidoreductase KefF) (EC 1.6.5.2)	P0A754	3	100	174	98.9	2.08	423.6	6	2.08	245.3	x-ray
LACA	Galactoside O-acetyltransferase (GAT) (EC 2.3.1.18) (Thiogalactoside acetyltransferase)	P07464	4	100	200	98.5	2.83	389.6	4	2.83	389.6	x-ray
LACI	Lactose operon repressor	P03023	14	100	268	74.4	2.97	62.7	14	2.97	62.7	x-ray
LACY	Lactose permease (Lactose-proton symport)	P02920	5	62.5	417	100	3.39	82.7	5	3.39	82.7	x-ray
LACZ	Beta-galactosidase (Beta-gal) (EC 3.2.1.23) (Lactase)	P00722	54	98.2	1011	98.7	2.18	231.9	54	2.18	231.9	x-ray
LACZ	Beta-galactosidase (Beta-gal) (EC 3.2.1.23) (Lactase)	P00722	5	100	1020	99.6	4.5	241.9	10	4.5	241.9	em
LAMB	Maltoporin (Lambda receptor protein) (Maltose-inducible porin)	P02943	6	100	421	94.4	2.85	153.4	6	2.85	153.4	x-ray
LDCA	Murein tetrapeptide carboxypeptidase	P76008	2	100	185	60.9	1.75		3	1.75	346.5	x-ray
LDHA	D-lactate dehydrogenase	P52643/A0A140N893	2	100	258	78.4	2.64		6	2.41	158.1	x-ray
LEPA	Elongation factor 4 (EF-4) (EC 3.6.5.n1) (Ribosomal back-translocase LepA)	P60785	1	100	499	83.3	2.8		6	2.8	180.5	x-ray
LEPB	Signal peptidase I	P00803	3	50	181	55.9	2.25	184.6	4	2.29	176.8	x-ray
LEUO	HTH-type transcriptional regulator LeuO	P10151	3	100	119	37.9	1.73	205.5	3	1.73	205.5	x-ray
LEUS	Leucine--tRNA ligase (EC 6.1.1.4) (Leucyl-tRNA synthetase) (LeuRS)	P07813	7	43.8	860	100	2.76	140.3	7	2.76	140.3	x-ray
LEXA	LexA repressor (EC 3.4.21.88)	P0A7C2	7	100	104	51.5	2.4	63.2	7	2.4	63.2	x-ray
LIGA	DNA ligase (EC 6.5.1.2) (Polydeoxyribonucleotide synthase [NAD(+)])	P15042	3	100	478	71.2	1.92	82.6	3	1.92	82.6	x-ray
LIVJ	Leu/Ile/Val-binding protein (LIV-BP)	P0AD96	5	100	344	93.7	1.98	91.5	5	1.98	91.5	x-ray
LIVK	Leucine-specific-binding protein (L-BP) (LS-BP)	P04816	4	100	345	93.5	1.93	87.1	4	1.93	87.1	x-ray
LNT	Apolipoprotein N-acyltransferase (ALP N-acyltransferase) (EC 2.3.1.-) (Copper homeostasis protein CutE)	P23930	5	100	296	57.8	2.61	207.5	8	2.68	189.9	x-ray
LOLA	Outer-membrane lipoprotein carrier protein (P20)	P61316	4	57.1	182	89.7	2.15	38.1	6	2.16	37.1	x-ray
LOLB	Outer-membrane lipoprotein LolB	P61320	5	100	176	85	2.11	93.6	6	2.08	92.5	x-ray
LOLC	Lipoprotein-releasing system transmembrane protein LolC	P0ADC3	2	66.7	218	54.6	1.94		4	1.94	199.8	x-ray
LPDA	Dihydrolipoyl dehydrogenase (EC 1.8.1.4) (Dihydrolipoamide dehydrogenase) (E3 component of pyruvate and 2-oxoglutarate dehydrogenases complexes) (Glycine cleavage system L protein)	P0A9P0/C3TQA2	2	100	469	98.9	2.34		8	2.25	253.1	x-ray
LPLA	Lipoate-protein ligase A (EC 6.3.1.20) (Lipoate--protein ligase)	P32099	6	100	174	51.5	2.69	64.7	6	2.69	64.7	x-ray
LPP	Major outer membrane prolipoprotein Lpp	P69776	5	62.5	52	66.7	1.66	124.2	8	1.6	124.4	x-ray
LPTA	Lipopolysaccharide export system protein LptA	P0ADV1	2	100	82	44.3	2.71		9	3.02	47.9	x-ray
LPTB	Lipopolysaccharide export system ATP-binding protein LptB (EC 3.6.3.-)	P0A9V1	5	100	233	96.7	1.84	105.8	5	1.84	105.8	x-ray
LPTB	Lipopolysaccharide export system ATP-binding protein LptB (EC 3.6.3.-)	P0A9V1	4	100	230	95.4	4.15	52.9	8	4.15	44.6	em
LPTC	Lipopolysaccharide export system protein LptC	P0ADV9	2	100	124	64.9	2.5		3	2.6	216	x-ray
LPTD	LPS-assembly protein LptD	P31554/Q83SQ0	2	100	555	70.8	2.88		3	3.04	371.6	x-ray
LPTE	LPS-assembly lipoprotein LptE	P0ADC1/Q83LX4	2	50	150	77.7	2.88		3	3.04	348	x-ray
LPXA	Acyl-[acyl-carrier-protein]--UDP-N-acetylglucosamine O-acyltransferase (UDP-N-acetylglucosamine acyltransferase) (EC 2.3.1.129)	P0A722	8	100	262	100	2.04	205.5	8	2.04	205.5	x-ray
LPXB	Lipid-A-disaccharide synthase (EC 2.4.1.182)	P10441	3	100	305	79.8	2.03	387.9	3	2.03	387.9	x-ray
LPXC	UDP-3-O-acyl-N-acetylglucosamine deacetylase	P0A725/(D5CV28/K0BGQ2)	8	100	300	98.4	2.05	125.2	8	2.05	125.2	x-ray
LPXD	UDP-3-O-(3-hydroxymyristoyl)glucosamine N-acyltransferase (UDP-3-O-(3-OHC14)-GlcN N-acyltransferase) (EC 2.3.1.191) (Protein FirA) (Rifampicin resistance protein) (UDP-3-O-(3-hydroxytetradecanoyl)glucosamine N-acyltransferase)	P21645	4	100	336	98.5	2.43	196.7	4	2.43	196.7	x-ray
LRP	Leucine-responsive regulatory protein	P0ACJ0	1	100	151	92.1	3.2		4	3.2	94.9	x-ray
LSRF	3-hydroxy-5-phosphonooxypentane-2,4-dione thiolase (EC 2.3.1.245)	P76143	1	25	281	96.6	2.51		9	2.51	136.9	x-ray
LSRG	(4S)-4-hydroxy-5-phosphonooxypentane-2,3-dione isomerase	D3QT67	1	100	96	100	1.8		4	1.8	171.3	x-ray
LSRK	Autoinducer-2 kinase	P77432	3	100	309	58.3	2.8	539.4	6	2.8	405.8	x-ray
LSRR	Transcriptional regulator LsrR	P76141	2	28.6	306	96.5	2.91		8	2.91	105.3	x-ray
LTAE	Low specificity L-threonine aldolase (Low specificity L-TA) (EC 4.1.2.48)	P75823/(E7U392/L4EJM2)	5	100	331	99.4	2.18	241.3	12	2.17	188.6	x-ray
LYSC	Lysine-sensitive aspartokinase 3	P08660	2	100	357	79.5	2.65		3	2.7	228.4	x-ray
LYSU	Lysine--tRNA ligase, heat inducible (EC 6.1.1.6) (Lysyl-tRNA synthetase) (LysRS)	P0A8N5	4	66.7	342	67.7	2.5	161.7	6	2.6	152.5	x-ray
MAA	Maltose O-acetyltransferase	P77791	1	100	182	99.5	2.15		3	2.15	937.8	x-ray
MACA	Macrolide export protein MacA	P75830	2	100	340	91.6	4.3		12	4.3	610.3	em
MACB	Macrolide export ATP-binding/permease protein MacB	P75831	2	100	403	62.2	4.3		4	4.3	3259.6	em
MALE	Maltose-binding periplasmic protein (MBP) (MMBP) (Maltodextrin-binding protein)	P0AEX9	183	87.1	352	88.9	2.33	60.4	183	2.33	60.4	x-ray
MALF	Maltose transport system permease protein MalF	P02916	12	100	242	47.1	2.9	83.4	12	2.9	83.4	x-ray
MALG	Maltose transport system permease protein MalG	P68183	10	83.3	273	92.2	2.75	80.1	11	2.85	74.6	x-ray
MALK	Maltose/maltodextrin import ATP-binding protein MalK (EC 3.6.3.19)	P68187	17	94.4	367	98.9	2.83	60.9	17	2.83	60.9	x-ray
MALP	Maltodextrin phosphorylase (EC 2.4.1.1)	P00490	11	100	796	99.9	2.29	161	11	2.29	161	x-ray
MALQ	4-alpha-glucanotransferase (EC 2.4.1.25) (Amylomaltase) (Disproportionating enzyme) (D-enzyme)	P15977	3	100	637	91.8	2.33	292.1	5	2.38	221.2	x-ray
MANY	PTS system mannose-specific EIIC component	P69801	1	100	245	92.1	3.52		3	3.52	144771	em
MANZ	PTS system mannose-specific EIID component	P69805	1	100	266	94	3.52		3	3.52	167441	em
MAP	Methionine aminopeptidase (MAP) (MetAP) (EC 3.4.11.18) (Peptidase M)	P0AE18	39	100	258	97.7	1.71	132.8	39	1.71	132.8	x-ray
MARR	Multiple antibiotic resistance protein MarR	P27245	5	83.3	136	94.4	2.55	70.8	6	2.57	65	x-ray
MATP	Macrodomain Ter protein	P0A8N0	1	100	147	98	3.55		8	3.55	61.4	x-ray
MAZE	Antitoxin MazE	P0AE72	2	50	44	53.7	1.68		3	1.67	100.1	x-ray
MAZF	Endoribonuclease MazF (EC 3.1.27.-) (Toxin MazF) (mRNA interferase MazF)	P0AE70	10	83.3	84	75.7	2.45	79.2	10	2.45	79.2	x-ray
MCRB	5-methylcytosine-specific restriction enzyme B (EC 3.1.21.-) (EcoKMcrBC)	P15005	6	100	152	33.1	1.99	118.7	7	1.94	108.7	x-ray
MCRB(Ct)	5-methylcytosine-specific restriction enzyme B (EC 3.1.21.-) (EcoKMcrBC)	P15005	6	100	284	61.9	4.25	211.4	12	4.25	130	em
MCRC	Protein McrC	P15006	6	100	240	69	4.25	205.1	11	4.31	208.9	em
MDFA	Multidrug transporter MdfA (Chloramphenicol resistance pump Cmr)	P0AEY8	3	100	391	95.4	2.22	524.8	3	2.22	524.8	x-ray
MDH	Malate dehydrogenase (EC 1.1.1.37)	P61889	6	75	312	100	2	147.6	10	2.03	132.9	x-ray
MENB	1,4-dihydroxy-2-naphthoyl-CoA synthase (DHNA-CoA synthase) (EC 4.1.3.36)	P0ABU0	6	100	181	63.5	2.14	319.4	6	2.14	319.4	x-ray
MENC	o-succinylbenzoate synthase (OSB synthase) (OSBS) (EC 4.2.1.113) (4-(2'-carboxyphenyl)-4-oxybutyric acid synthase) (o-succinylbenzoic acid synthase)	P29208	4	100	194	60.6	1.84	171.1	7	2.03	120.6	x-ray
MEND	2-succinyl-5-enolpyruvyl-6-hydroxy-3-cyclohexene-1-carboxylate synthase (SEPHCHC synthase) (EC 2.2.1.9) (Menaquinone biosynthesis protein MenD)	P17109	14	87.5	556	100	2.08	315.7	19	2.15	287.8	x-ray
MENF	Isochorismate synthase MenF (EC 5.4.4.2) (Isochorismate hydroxymutase) (Isochorismate mutase)	P38051	3	100	428	99.3	2.15	187.5	4	2.24	152.7	x-ray
MENH	2-succinyl-6-hydroxy-2,4-cyclohexadiene-1-carboxylate synthase (SHCHC synthase) (EC 4.2.99.20)	P37355	6	100	252	100	2	121	11	2.05	109.4	x-ray
MENI	1,4-dihydroxy-2-naphthoyl-CoA hydrolase (DHNA-CoA hydrolase) (EC 3.1.2.28) (DHNA-CoA thioesterase)	P77781	6	100	136	100	1.87	142.3	6	1.87	142.3	x-ray
MEPA	Penicillin-insensitive murein endopeptidase (EC 3.4.24.-) (D-alanyl-D-alanine-endopeptidase) (DD-endopeptidase)	P0C0T5	2	100	222	81	1.9		7	2.11	164.4	x-ray
METB	Cystathionine gamma-synthase	P00935	1	100	384	99.5	1.5		4	1.5	408.6	x-ray
METC	Cystathionine beta-lyase MetC (CBL) (EC 4.4.1.8) (Beta-cystathionase) (Cysteine lyase)	P06721	6	100	392	99.2	1.83	238.6	6	1.83	238.6	x-ray
METF	5,10-methylenetetrahydrofolate reductase (EC 1.5.1.20)	P0AEZ1	9	100	164	55.4	2	186.5	9	2	186.5	x-ray
METG	Methionine--tRNA ligase (EC 6.1.1.10) (Methionyl-tRNA synthetase) (MetRS)	P00959	11	84.6	544	80.4	1.73	272.2	11	1.73	272.2	x-ray
METH	Methionine synthase (EC 2.1.1.13) (5-methyltetrahydrofolate--homocysteine methyltransferase) (Methionine synthase, vitamin-B12-dependent) (MS)	P13009	5	71.4	576	46.9	3	142.8	5	3	142.8	x-ray
METI	D-methionine transport system permease protein MetI	P31547	5	100	203	93.5	3.39	67.3	10	3.39	54.9	x-ray
METJ	Met repressor (Met regulon regulatory protein MetJ)	P0A8U6	10	100	104	99	2.32	76	10	2.32	76	x-ray
METK	S-adenosylmethionine synthase (AdoMet synthase) (EC 2.5.1.6) (MAT) (Methionine adenosyltransferase)	P0A817	9	100	276	71.9	2.87	108.3	9	2.87	108.3	x-ray
METN	Methionine import ATP-binding protein MetN (EC 3.6.3.-)	P30750	5	83.3	343	100	3.5	75	9	3.44	44.1	x-ray
MGLB	D-galactose-binding periplasmic protein (GBP) (D-galactose/ D-glucose-binding protein) (GGBP)	P0AEE5	9	100	304	91.6	1.43	101.7	9	1.43	101.7	x-ray
MGSA	Methylglyoxal synthase (MGS) (EC 4.2.3.3)	P0A731	5	100	151	99.3	2.06	299.1	5	2.06	299.1	x-ray
MHPC	2-hydroxy-6-oxononadienedioate/2-hydroxy-6-oxononatrienedioate hydrolase	P77044	1	100	285	99	2.1		4	2.1	320.2	x-ray
MHPD	2-keto-4-pentenoate hydratase (EC 4.2.1.80) (2-hydroxypentadienoic acid hydratase)	P77608	2	100	261	97	2.85		12	2.84	321.2	x-ray
MIAA	tRNA dimethylallyltransferase (EC 2.5.1.75) (Dimethylallyl diphosphate:tRNA dimethylallyltransferase) (DMAPP:tRNA dimethylallyltransferase) (DMATase) (Isopentenyl-diphosphate:tRNA isopentenyltransferase) (IPP transferase) (IPPT) (IPTase)	P16384	3	100	303	95.9	2.6	471.6	6	2.6	256.8	x-ray
MIND	Septum site-determining protein MinD (Cell division inhibitor MinD)	P0AEZ3	2	66.7	257	95.2	2.47		4	2.47	381.8	x-ray
MLAC	Intermembrane phospholipid transport system binding protein MlaC	P0ADV7	2	100	184	87.2	1.87		4	1.87	101.1	x-ray
MLAD	Probable phospholipid ABC transporter-binding protein MlaD	P64605	2	100	82	44.8	2.5		9	2.38	144.1	x-ray
MLC	Protein mlc	P50456	2	100	304	74.9	2.78		5	2.73	63.9	x-ray
MLTA	Membrane-bound lytic murein transglycosylase A (EC 4.2.2.n1) (Mlt38) (Murein hydrolase A)	P0A935	5	100	333	91.2	2.29	82.1	5	2.29	82.1	x-ray
MLTB	Membrane-bound lytic murein transglycosylase B (EC 4.2.2.n1) (35 kDa soluble lytic transglycosylase) (Murein hydrolase B) (Slt35)	P41052	8	100	253	70.1	2.06	259	8	2.06	259	x-ray
MLTC	Membrane-bound lytic murein transglycosylase C (EC 4.2.2.n1) (Murein lyase C)	P0C066	4	100	327	91.1	2.46	156	4	2.46	156	x-ray
MNMA	tRNA-specific 2-thiouridylase MnmA	P25745	2	66.7	364	98.9	3.4		3	3.4	667.9	x-ray
MNMC	tRNA 5-methylaminomethyl-2-thiouridine biosynthesis bifunctional protein MnmC (tRNA mnm(5)s(2)U biosynthesis bifunctional protein) [Includes: tRNA (mnm(5)s(2)U34)-methyltransferase (EC 2.1.1.61); FAD-dependent cmnm(5)s(2)U34 oxidoreductase (EC 1.5.-.-)]	P77182	1	100	628	94	3		6	3	183.3	x-ray
MNME	tRNA modification GTPase MnmE (EC 3.6.-.-)	P25522	3	100	159	35	1.85	298.8	10	1.85	123	x-ray
MOAB	Molybdenum cofactor biosynthesis protein B	P0AEZ9	2	100	168	98.8	1.85		4	1.85	224	x-ray
MOAC	Cyclic pyranopterin monophosphate synthase (EC 4.6.1.17) (Molybdenum cofactor biosynthesis protein C)	P0A738	4	100	124	77	2.37	150.8	4	2.37	150.8	x-ray
MOAD	Molybdopterin synthase sulfur carrier subunit (MPT synthase subunit 1) (Molybdenum cofactor biosynthesis protein D) (Molybdopterin-converting factor small subunit) (Molybdopterin-converting factor subunit 1) (Sulfur carrier protein MoaD)	P30748	7	100	80	98.8	2.02	59.5	7	2.02	59.5	x-ray
MOAE	Molybdopterin synthase catalytic subunit (EC 2.8.1.12) (MPT synthase subunit 2) (Molybdenum cofactor biosynthesis protein E) (Molybdopterin-converting factor large subunit) (Molybdopterin-converting factor subunit 2)	P30749	5	100	94	62.7	1.92	76.5	5	1.92	76.5	x-ray
MOBA	Molybdenum cofactor guanylyltransferase (MoCo guanylyltransferase) (EC 2.7.7.77) (GTP:molybdopterin guanylyltransferase) (Mo-MPT guanylyltransferase) (Molybdopterin guanylyltransferase) (Molybdopterin-guanine dinucleotide biosynthesis protein A) (Molybdopterin-guanine dinucleotide synthase) (MGD synthase) (Protein FA)	P32173	8	100	168	86.6	1.68	186.5	8	1.68	186.5	x-ray
MOBB	Molybdopterin-guanine dinucleotide biosynthesis adapter protein	P32125	2	100	116	66.3	2.35		4	2.35	98.4	x-ray
MODA	Molybdate-binding periplasmic protein	P37329	5	100	231	89.9	1.73	204.4	8	1.76	136.8	x-ray
MODE	Transcriptional regulator ModE	P0A9G8	5	100	138	52.7	2.06	82.9	5	2.06	82.9	x-ray
MOEA	Molybdopterin molybdenumtransferase (MPT Mo-transferase) (EC 2.10.1.1)	P12281	14	100	402	97.8	2.56	107.3	14	2.56	107.3	x-ray
MOEB	Molybdopterin-synthase adenylyltransferase (EC 2.7.7.80) (MoaD protein adenylase) (Molybdopterin-converting factor subunit 1 adenylase) (Sulfur carrier protein MoaD adenylyltransferase)	P12282	3	100	165	66.3	2.23	130.4	3	2.23	130.4	x-ray
MPPA	Periplasmic murein peptide-binding protein	P77348	2	100	509	94.8	1.79		3	1.69	166.7	x-ray
MQSA	Antitoxin MqsA	Q46864	2	40	131	100	2.13		4	2.13	77.1	x-ray
MRCB	Penicillin-binding protein 1B (PBP-1b) (PBP1b) (Murein polymerase) [Includes: Penicillin-insensitive transglycosylase (EC 2.4.1.129) (Peptidoglycan TGase) (Peptidoglycan glycosyltransferase); Penicillin-sensitive transpeptidase (EC 3.4.16.4) (DD-transpeptidase)]	P02919	7	100	368	43.6	2.56	164.7	7	2.56	164.7	x-ray
MRDA	Peptidoglycan D,D-transpeptidase MrdA	P0AD65/P0AD67	3	100	493	77.9	2.15	470.6	3	2.15	470.6	x-ray
MSBA	Lipid A export ATP-binding/permease protein MsbA	P60752/P60753	3	100	570	97.9	3.71	84.4	6	4.51	90.6	x-ray
MSBA	Lipid A export ATP-binding/permease protein MsbA	P60753	2	100	569	97.8	4.5		4	4.5	59.9	em
MSCS	Small-conductance mechanosensitive channel	P0C0S1	6	85.7	254	88.8	4.01	119	6	4.01	119	x-ray
MSCS	Small-conductance mechanosensitive channel	A0A387D516	1	100	265	92.7	2.9		7	2.9	132667	em
MSRA	Peptide methionine sulfoxide reductase MsrA	P0A744	1	100	185	87.3	1.9		3	1.9	394.3	x-ray
MSRP	Protein-methionine-sulfoxide reductase catalytic subunit MsrP (EC 1.8.5.-)	P76342	2	100	238	71.3	2.38		15	2.32	235.8	x-ray
MTNN	5'-methylthioadenosine/S-adenosylhomocysteine nucleosidase (MTA/SAH nucleosidase) (MTAN) (EC 3.2.2.9) (5'-methylthioadenosine nucleosidase) (MTA nucleosidase) (P46) (S-adenosylhomocysteine nucleosidase) (AdoHcy nucleosidase) (SAH nucleosidase) (SRH nucleosidase)	P0AF12/P0AF14/A7ZHQ1	11	91.7	231	99.6	1.98	118.3	11	1.98	118.3	x-ray
MUG	G/U mismatch-specific DNA glycosylase (EC 3.2.2.28) (Double-strand-specific uracil glycosylase) (Mismatch-specific uracil DNA-glycosylase) (MUG)	P0A9H1	3	75	165	98.2	2.33	277.9	3	2.33	277.9	x-ray
MUKE	Chromosome partition protein MukE	P22524	2	100	204	87.2	3.25		3	3.37	240.2	x-ray
MUKF	Chromosome partition protein MukF (Protein KicB)	P60293	2	66.7	259	58.9	3.25		4	3.25	127.3	x-ray
MURA	UDP-N-acetylglucosamine 1-carboxyvinyltransferase (EC 2.5.1.7) (Enoylpyruvate transferase) (UDP-N-acetylglucosamine enolpyruvyl transferase) (EPT)	P0A749	7	100	418	99.8	2.15	145.3	7	2.15	145.3	x-ray
MURB	UDP-N-acetylenolpyruvoylglucosamine reductase (EC 1.3.1.98) (UDP-N-acetylmuramate dehydrogenase)	P08373	5	100	340	99.4	2.28	115.4	5	2.28	115.4	x-ray
MURD	UDP-N-acetylmuramoylalanine--D-glutamate ligase (EC 6.3.2.9) (D-glutamic acid-adding enzyme) (UDP-N-acetylmuramoyl-L-alanyl-D-glutamate synthetase)	P14900	20	90.9	219	50	1.78	174.5	20	1.78	174.5	x-ray
MURG	UDP-N-acetylglucosamine--N-acetylmuramyl-(pentapeptide) pyrophosphoryl-undecaprenol N-acetylglucosamine transferase (EC 2.4.1.227) (Undecaprenyl-PP-MurNAc-pentapeptide-UDPGlcNAc GlcNAc transferase)	P17443	2	100	350	98.6	2.2		4	2.2	138	x-ray
MUTH	DNA mismatch repair protein MutH	P06722	2	100	115	50.2	2		3	2.1	113.1	x-ray
MUTL	DNA mismatch repair protein MutL	P23367	4	40	305	49.6	2.08	257.7	4	2.08	257.7	x-ray
MUTM	Formamidopyrimidine-DNA glycosylase	P05523	1	100	216	80.3	2.1		4	2.1	299.6	x-ray
MUTS	DNA mismatch repair protein MutS	P23909	16	100	531	62.3	3.27	74	16	3.27	74	x-ray
MUTT	8-oxo-dGTP diphosphatase (8-oxo-dGTPase) (EC 3.6.1.55) (7,8-dihydro-8-oxoguanine-triphosphatase) (Mutator protein MutT) (dGTP pyrophosphohydrolase)	P08337	4	100	99	76.7	2.08	119.6	4	2.08	119.6	x-ray
MUTY	Adenine DNA glycosylase (EC 3.2.2.-) (A/G-specific adenine glycosylase)	P17802	12	92.3	224	64	1.54	120.7	12	1.54	120.7	x-ray
NADD	Nicotinate-nucleotide adenylyltransferase (EC 2.7.7.18) (Deamido-NAD(+) diphosphorylase) (Deamido-NAD(+) pyrophosphorylase) (Nicotinate mononucleotide adenylyltransferase) (NaMN adenylyltransferase)	P0A752	2	100	212	99.5	1.95		6	1.95	99.2	x-ray
NAGA	N-acetylglucosamine-6-phosphate deacetylase	P0AF18	2	50	382	100	2.15		3	2.13	463.3	x-ray
NAGB	Glucosamine-6-phosphate deaminase (EC 3.5.99.6) (GlcN6P deaminase) (GNPDA) (Glucosamine-6-phosphate isomerase)	P0A759	10	90.9	266	100	2.16	146	10	2.16	146	x-ray
NANA	N-acetylneuraminate lyase (NAL) (Neu5Ac lyase) (EC 4.1.3.3) (N-acetylneuraminate pyruvate-lyase) (N-acetylneuraminic acid aldolase) (NALase) (Sialate lyase) (Sialic acid aldolase) (Sialic acid lyase)	P0A6L4	22	100	291	98	1.95	156.2	22	1.95	156.2	x-ray
NARG	Respiratory nitrate reductase 1 alpha chain (EC 1.7.99.4) (Nitrate reductase A subunit alpha) (Quinol-nitrate oxidoreductase subunit alpha)	P09152	10	90.9	1189	95.3	2.17	391.8	10	2.17	391.8	x-ray
NARH	Respiratory nitrate reductase 1 beta chain (EC 1.7.99.4) (Nitrate reductase A subunit beta) (Quinol-nitrate oxidoreductase subunit beta)	P11349	11	100	465	90.8	2.23	324.8	11	2.23	324.8	x-ray
NARI	Respiratory nitrate reductase 1 gamma chain (EC 1.7.99.4) (Cytochrome B-NR) (Nitrate reductase A subunit gamma) (Quinol-nitrate oxidoreductase subunit gamma)	P11350	10	100	145	64.4	2.25	284.1	10	2.25	284.1	x-ray
NARK	Nitrate/nitrite transporter NarK	P10903	3	60	225	48.6	2.38	310.2	4	2.39	226.8	x-ray
NARL	Nitrate/nitrite response regulator protein NarL	P0AF28	2	40	138	63.9	2.3		3	2.27	282.6	x-ray
NARQ	Nitrate/nitrite sensor protein NarQ (EC 2.7.13.3)	P27896	4	100	190	33.6	2.24	109	5	2.28	98.6	x-ray
NARU	Nitrate/nitrite transporter NarU	P37758	2	100	224	48.5	3.06		4	3.06	136	x-ray
NARX	Nitrate/nitrite sensor protein NarX	P0AFA2	2	100	99	16.6	1.7		6	1.7	101.2	x-ray
NDK	Nucleoside diphosphate kinase (NDK) (NDP kinase) (EC 2.7.4.6) (Nucleoside-2-P kinase)	P0A763	1	100	142	99.3	1.62		6	1.62	200.4	x-ray
NEI	Endonuclease 8 (DNA glycosylase/AP lyase Nei) (EC 3.2.2.-) (EC 4.2.99.18) (DNA-(apurinic or apyrimidinic site) lyase Nei) (Endonuclease VIII)	P50465	7	77.8	212	80.6	1.8	91.1	8	1.9	81.5	x-ray
NFO	Endonuclease 4 (EC 3.1.21.2) (Endodeoxyribonuclease IV) (Endonuclease IV)	P0A6C1	6	100	279	97.9	1.58	257.7	6	1.58	257.7	x-ray
NFSB	Oxygen-insensitive NAD(P)H nitroreductase (EC 1.-.-.-) (Dihydropteridine reductase) (EC 1.5.1.34) (FMN-dependent nitroreductase)	P38489	14	100	216	99.5	2.1	182.8	19	2.07	169.8	x-ray
NHAA	Na(+)/H(+) antiporter NhaA (Sodium/proton antiporter NhaA)	P13738	3	100	374	96.4	3.55	133.4	6	3.55	117	x-ray
NIKA	Nickel-binding periplasmic protein	P33590	26	100	496	94.7	1.96	107.7	29	1.95	102.1	x-ray
NIKR	Nickel-responsive regulator	P0A6Z6	6	75	81	60.9	2.13	83.6	6	2.13	83.6	x-ray
NLPE	Lipoprotein NlpE	P40710	2	100	167	70.8	2.7		4	2.7	71.8	x-ray
NLPI	Lipoprotein NlpI	P0AFB1	5	100	236	80.3	2.53	174.4	9	2.49	162.8	x-ray
NORV	Anaerobic nitric oxide reductase flavorubredoxin (FlRd) (FlavoRb)	Q46877	4	100	398	83.1	2.05	364.7	5	2.02	351.4	x-ray
NRDA	Ribonucleoside-diphosphate reductase 1 subunit alpha (EC 1.17.4.1) (Protein B1) (Ribonucleoside-diphosphate reductase 1 R1 subunit) (Ribonucleotide reductase 1)	P00452	17	68	727	95.5	3.29	101.8	17	3.29	101.8	x-ray
NRDB	Ribonucleoside-diphosphate reductase 1 subunit beta (EC 1.17.4.1) (Protein B2) (Protein R2) (Ribonucleotide reductase 1)	P69924	31	64.6	339	90.2	2.47	119.2	31	2.47	119.2	x-ray
NRDF	Ribonucleoside-diphosphate reductase 2 subunit beta (EC 1.17.4.1) (R2F protein) (Ribonucleotide reductase 2)	P37146	6	100	281	88.1	2.07	205.8	9	2.14	179.1	x-ray
NRDI	Protein NrdI	P0A772	3	100	128	94.1	2.28	272.6	6	2.28	149.2	x-ray
NRFA	Cytochrome c-552 (EC 1.7.2.2) (Ammonia-forming cytochrome c nitrite reductase) (Cytochrome c nitrite reductase)	P0ABK9	6	100	440	92.1	2.12	292.8	6	2.12	292.8	x-ray
NUDB	Dihydroneopterin triphosphate diphosphatase (EC 3.6.1.67) (Dihydroneopterin triphosphate pyrophosphatase) (dATP pyrophosphohydrolase)	P0AFC0	5	100	141	94	2.03	188.5	11	2.12	100.9	x-ray
NUDC	NADH pyrophosphatase (EC 3.6.1.22)	P32664	5	100	243	94.6	2.43	88.5	8	2.43	84.2	x-ray
NUDE	ADP compounds hydrolase NudE	P45799	2	100	184	98.9	2.51		4	2.51	294.9	x-ray
NUDF	ADP-ribose pyrophosphatase (EC 3.6.1.13) (ADP-ribose diphosphatase) (ADP-ribose phosphohydrolase) (ASPPase) (Adenosine diphosphoribose pyrophosphatase) (ADPR-PPase)	Q93K97	5	100	153	73.2	2.27	156.1	6	2.29	135.6	x-ray
NUDJ	Phosphatase NudJ (EC 3.6.1.-)	P0AEI6(G7RNP0)/A1AA28	4	100	150	98	2.57	208.8	24	2.53	95	x-ray
NUDK	GDP-mannose pyrophosphatase NudK (EC 3.6.1.-)	P37128	5	100	103	53.9	2.3	146.9	5	2.3	146.9	x-ray
NUSA	Transcription termination/antitermination protein NusA	P0AFF6/P0AFF8	2	66.7	319	64.4	2.75		3	2.95	91.6	x-ray
NUSB	N utilization substance protein B (Protein NusB)	P0A780/B7MD74	4	100	132	95	2.44	41.9	9	2.59	35.9	x-ray
OMPC	Membrane protein	Q9K597	4	100	343	94.2	2.78	280.4	4	2.78	280.4	x-ray
OMPF	Outer membrane protein F (Outer membrane protein 1A) (Outer membrane protein B) (Outer membrane protein IA) (Porin OmpF)	P02931	31	96.9	313	86.5	2.73	143.1	31	2.73	143.1	x-ray
OMPG	Outer membrane protein G	P76045	3	50	277	92	2.39	163.4	7	2.4	155.2	x-ray
OMPW	Outer membrane protein W	P0A915	2	100	163	76.9	2.85		6	2.85	430.7	x-ray
OPPA	Periplasmic oligopeptide-binding protein	P23843	3	100	517	95.2	1.99	174.3	9	2	131.9	x-ray
ORN	Oligoribonuclease (EC 3.1.-.-)	P0A784	2	100	179	98.9	1.95		6	2.03	149.2	x-ray
OSMC	Peroxiredoxin OsmC (EC 1.11.1.15) (Osmotically-inducible protein C)	P0C0L2	2	100	142	99.3	2.1		8	2.1	179.8	x-ray
OTSA	Trehalose-6-phosphate synthase (TPS) (EC 2.4.1.15) (Alpha,alpha-trehalose-phosphate synthase [UDP-forming]) (Osmoregulatory trehalose synthesis protein A) (OtsA) (UDP-glucose-glucosephosphate glucosyltransferase)	P31677	4	100	438	92.4	2.16	239.4	7	2.21	167.1	x-ray
OXC	Oxalyl-CoA decarboxylase (EC 4.1.1.8)	P0AFI0	3	100	545	96.6	1.89	889.3	6	1.89	509.6	x-ray
PAAA	1,2-phenylacetyl-CoA epoxidase, subunit A (EC 1.14.13.149) (1,2-phenylacetyl-CoA epoxidase, catalytic subunit alpha) (1,2-phenylacetyl-CoA monooxygenase, subunit A)	P76077	6	85.7	301	97.4	2.38	253.4	7	2.47	240.9	x-ray
PAAC	1,2-phenylacetyl-CoA epoxidase, subunit C (1,2-phenylacetyl-CoA epoxidase, structural subunit beta) (1,2-phenylacetyl-CoA monooxygenase, subunit C)	P76079	8	100	242	97.6	2.37	207.4	11	2.42	178.2	x-ray
PAAH	3-hydroxyadipyl-CoA dehydrogenase	P76083	1	100	470	98.9	2.2		3	2.2	296.5	x-ray
PAAI	Acyl-coenzyme A thioesterase PaaI	P76084	2	100	130	92.9	2.1		4	2.1	121.4	x-ray
PABB	Aminodeoxychorismate synthase component 1	P05041	2	100	269	59.4	2.03		4	2.03	168.5	x-ray
PAL	Peptidoglycan-associated lipoprotein	P0A912	3	100	106	61.3	1.76	235.1	7	1.72	148.4	x-ray
PANB	3-methyl-2-oxobutanoate hydroxymethyltransferase (EC 2.1.2.11) (Ketopantoate hydroxymethyltransferase) (KPHMT)	P31057	1	100	262	99.2	1.8		4	1.8	413.3	x-ray
PAND	Aspartate 1-decarboxylase (EC 4.1.1.11) (Aspartate alpha-decarboxylase) [Cleaved into: Aspartate 1-decarboxylase beta chain; Aspartate 1-decarboxylase alpha chain]	P0A790	8	47.1	115	91.3	1.81	123	8	1.81	123	x-ray
PANE	2-dehydropantoate 2-reductase (EC 1.1.1.169) (Ketopantoate reductase) (KPA reductase) (KPR)	P0A9J4	4	100	291	96	2.01	127.9	4	2.01	127.9	x-ray
PANZ	PanD regulatory factor	P37613	4	100	127	100	1.64	345.5	4	1.64	345.5	x-ray
PATA	Putrescine aminotransferase (EC 2.6.1.82) (Putrescine--2-oxoglutaric acid transaminase) (PAT) (PATase)	P42588	4	100	445	96.9	2.59	279.5	7	2.47	232.6	x-ray
PCKA	Phosphoenolpyruvate carboxykinase (ATP) (PCK) (PEP carboxykinase) (PEPCK) (EC 4.1.1.49)	P22259	10	50	531	98.3	1.81	161.7	12	1.74	146	x-ray
PCM	Protein-L-isoaspartate O-methyltransferase	P0A7A5	1	100	207	99.5	1.8		3	1.8	273.5	x-ray
PCNB	Poly(A) polymerase I (PAP I) (EC 2.7.7.19) (Plasmid copy number protein)	P0ABF1(C9QS13)	4	100	290	62.4	3.28	203.8	7	3.22	161.3	x-ray
PDHR	Pyruvate dehydrogenase complex repressor	P0ACM0	1	50	137	53.9	2.8		4	2.8	791.7	x-ray
PDXA	4-hydroxythreonine-4-phosphate dehydrogenase (EC 1.1.1.262) (4-(phosphohydroxy)-L-threonine dehydrogenase)	P19624	3	100	328	99.7	2.23	351.5	6	2.23	137.2	x-ray
PDXH	Pyridoxine/pyridoxamine 5'-phosphate oxidase (EC 1.4.3.5) (PNP/PMP oxidase) (PNPOx) (Pyridoxal 5'-phosphate synthase)	P0AFI7	6	85.7	199	91.3	2.06	246.7	6	2.06	246.7	x-ray
PDXJ	Pyridoxine 5'-phosphate synthase (PNP synthase) (EC 2.6.99.2)	P0A794	7	100	140	57.6	2.21	237.9	7	2.21	237.9	x-ray
PDXK	Pyridoxine/pyridoxal/pyridoxamine kinase (PN/PL/PM kinase) (EC 2.7.1.35) (B6-vitamer kinase) (Pyridoxal kinase 1) (PL kinase 1)	P40191	3	100	187	66.1	2.63	229.2	3	2.63	229.2	x-ray
PDXY	Pyridoxal kinase PdxY (PL kinase) (EC 2.7.1.35) (Pyridoxal kinase 2) (PL kinase 2)	P77150	2	100	286	99.7	2.09		6	2.05	160.5	x-ray
PEPA	Cytosol aminopeptidase (EC 3.4.11.1) (Aminopeptidase A/I) (Leucine aminopeptidase) (LAP) (EC 3.4.11.10) (Leucyl aminopeptidase)	P68767	1	100	503	100	2.5		12	2.5	297.8	x-ray
PEPB	Peptidase B	P37095/(A0A387CSU7)	2	100	425	99.5	2.33		18	2.24	288.5	x-ray
PEPN	Aminopeptidase N (EC 3.4.11.2) (Alpha-aminoacylpeptide hydrolase)	P04825	35	94.6	865	99.4	2.03	378.8	35	2.03	378.8	x-ray
PEPP	Xaa-Pro aminopeptidase (EC 3.4.11.9) (Aminoacylproline aminopeptidase) (Aminopeptidase P II) (APP-II) (X-Pro aminopeptidase)	P15034	25	96.2	439	99.5	2.19	312.7	25	2.19	312.7	x-ray
PFKA	ATP-dependent 6-phosphofructokinase isozyme 1	P0A796	2	100	301	94.1	2.4		6	2.4	172	x-ray
PFKB	ATP-dependent 6-phosphofructokinase isozyme 2 (ATP-PFK 2) (Phosphofructokinase 2) (EC 2.7.1.11) (6-phosphofructokinase isozyme II) (Phosphohexokinase 2)	P06999	6	100	290	93.9	1.98	108.2	6	1.98	108.2	x-ray
PFLB	Formate acetyltransferase 1 (EC 2.3.1.54) (Pyruvate formate-lyase 1)	P09373	8	100	611	80.4	2.36	228.8	8	2.36	228.8	x-ray
PGAB	Poly-beta-1,6-N-acetyl-D-glucosamine N-deacetylase (PGA N-deacetylase) (Poly-beta-1,6-GlcNAc N-deacetylase) (EC 3.5.1.-)	P75906	6	75	300	44.6	1.86	178.5	6	1.86	178.5	x-ray
PGI	Glucose-6-phosphate isomerase (GPI) (EC 5.3.1.9) (Phosphoglucose isomerase) (PGI) (Phosphohexose isomerase) (PHI)	P0A6T1	1	100	549	100	2.05		5	2.05	398.2	x-ray
PHND	PhnD, subunit of alkylphosphonate ABC transporter	Q1R3F7	4	100	268	79.3	2.4	82.4	6	2.37	73	x-ray
PHNH	Alpha-D-ribose 1-methylphosphonate 5-triphosphate synthase subunit PhnH	P16686	2	100	99	51	1.7		3	1.7	205	x-ray
PHNP	Phosphoribosyl 1,2-cyclic phosphate phosphodiesterase (EC 3.1.4.55) (Phosphoribosyl cyclic phosphodiesterase)	P16692	2	100	249	98.8	1.44		4	1.44	419.8	x-ray
PHOA	Alkaline phosphatase (APase) (EC 3.1.3.1)	P00634	42	93.3	440	93.4	2.24	175.4	42	2.24	175.4	x-ray
PHOB	Phosphate regulon transcriptional regulatory protein PhoB	P0AFJ5	5	62.5	121	52.8	1.8	63.1	5	1.8	63.1	x-ray
PHOP	Transcriptional regulatory protein PhoP	P23836	2	100	119	53.4	2.22		3	2.33	149.4	x-ray
PHP	Phosphotriesterase homology protein	P45548	2	100	290	99.3	1.77		8	1.81	250.9	x-ray
PLDA	Phospholipase A1 (EC 3.1.1.32) (EC 3.1.1.4) (Detergent-resistant phospholipase A) (DR-phospholipase A) (Outer membrane phospholipase A) (OM PLA) (OMPLA) (Phosphatidylcholine 1-acylhydrolase)	P0A921	7	100	239	82.7	2.56	163.3	7	2.56	163.3	x-ray
PLIG	Inhibitor of g-type lysozyme	P76002	3	100	111	83.5	1.33	229.9	4	1.45	190.6	x-ray
PMBA	Metalloprotease PmbA (EC 3.4.-.-) (Protein TldE)	P0AFK0	6	100	443	98.4	1.47	196.3	6	1.47	196.3	x-ray
PNP	Polyribonucleotide nucleotidyltransferase	P05055/A7ZS61	2	33.3	544	76.5	3.04		11	3.38	157.9	x-ray
PNTA	NAD(P) transhydrogenase subunit alpha	P07001	3	100	213	41.8	1.96	755.4	6	1.96	267.4	x-ray
POLA	DNA polymerase I (POL I) (EC 2.7.7.7)	P00582	13	92.9	309	33.3	2.47	124.2	13	2.47	124.2	x-ray
POLB	DNA polymerase II (Pol II) (EC 2.7.7.7)	P21189	6	66.7	459	58.6	2.2	242.7	6	2.2	242.7	x-ray
POTD	Spermidine/putrescine-binding periplasmic protein (SPBP)	P0AFK9	2	100	322	99.7	2.15		5	2.36	168.5	x-ray
POTF	Putrescine-binding periplasmic protein	P31133	2	100	341	92.2	1.95		5	2.1	245.7	x-ray
POXB	Pyruvate dehydrogenase [ubiquinone] (EC 1.2.5.1) (Pyruvate oxidase) (POX) [Cleaved into: Alpha-peptide]	P07003	2	100	463	80.9	2.7		6	2.63	678.2	x-ray
PPA	Inorganic pyrophosphatase (EC 3.6.1.1) (Pyrophosphate phospho-hydrolase) (PPase)	P0A7A9	18	94.7	173	98.3	1.82	98.5	18	1.82	98.5	x-ray
PPC	Phosphoenolpyruvate carboxylase (PEPC) (PEPCase) (EC 4.1.1.31)	P00864	3	100	697	78.9	2.58	794.8	3	2.58	794.8	x-ray
PPDD	Prepilin peptidase-dependent pilin	Q8X974	1	100	140	95.9	8		14	8	68778.5	em
PPIA	Peptidyl-prolyl cis-trans isomerase A (PPIase A) (EC 5.2.1.8) (Cyclophilin A) (Rotamase A)	P0AFL3	3	100	166	87.4	1.77	285.3	5	1.76	202.5	x-ray
PPK	Polyphosphate kinase	P0A7B1	2	100	687	99.9	2.75		4	2.75	403.1	x-ray
PPNN	Pyrimidine/purine nucleotide 5'-monophosphate nucleosidase	P0ADR8	2	100	316	69.6	2.63		3	2.58	147.7	x-ray
PPTA	Tautomerase PptA (EC 5.3.2.-)	P31992	3	100	76	98.7	1.6	316	6	1.6	174.9	x-ray
PPX	Exopolyphosphatase (ExopolyPase) (EC 3.6.1.11) (Metaphosphatase)	P0AFL6/P0AFL8	2	100	495	96.5	2.05		6	2.1	161.9	x-ray
PQIB	Intermembrane transport protein PqiB	P43671	1	100	306	56	3.96		6	3.96	118665	em
PRC	Tail-specific protease	P23865	3	60	425	62.3	2.84	90.3	3	2.84	90.3	x-ray
PRFA	Peptide chain release factor RF1 (RF-1)	P0A7I0(A7ZKY5, B7MKB3)	4	57.1	251	69.7	3.19	123.2	8	3.19	107.3	x-ray
PRFB	Peptide chain release factor RF2 (RF-2)	P07012	3	100	357	97.8	2.74	65.3	5	2.92	46.3	x-ray
PRFB	Peptide chain release factor RF2 (RF-2)	P07012	7	58.3	357	97.8	6.15	24.1	7	6.15	24.1	em
PRFC	Peptide chain release factor RF3	P0A7I4/B1XFI4	4	100	281	53.1	3.38	98.4	4	3.38	98.4	x-ray
PRIA	Primosomal protein N' (EC 3.6.4.-) (ATP-dependent helicase PriA) (Replication factor Y)	P17888	6	85.7	103	14.1	3.08	116.8	6	3.08	116.8	x-ray
PRIB	Primosomal replication protein N	P07013	6	100	79	76	2.17	106.6	6	2.17	106.6	x-ray
PROB	Glutamate 5-kinase	P0A7B5	1	33.3	199	54.2	2.9		7	2.9	186.4	x-ray
PRPB	2-methylisocitrate lyase (2-MIC) (MICL) (EC 4.1.3.30) ((2R,3S)-2-methylisocitrate lyase)	P77541	4	100	286	96.6	1.83	292	8	1.83	236.1	x-ray
PRPR	Propionate catabolism operon regulatory protein	P77743	1	100	186	35.2	2.1		3	2.1	115.9	x-ray
PRR	Gamma-aminobutyraldehyde dehydrogenase (EC 1.2.1.19) (1-pyrroline dehydrogenase) (4-aminobutanal dehydrogenase) (ABALDH)	P77674	2	100	474	100	2.15		8	2.15	445.6	x-ray
PRS	Ribose-phosphate pyrophosphokinase	P0A717/P0A719	2	100	193	61.3	2.46		4	2.34	191	x-ray
PSPF	Psp operon transcriptional activator (Phage shock protein F)	P37344	9	90	164	50.5	1.88	175.8	9	1.88	175.8	x-ray
PSPF	Psp operon transcriptional activator	P37344	1	100	248	76.3	5.8		6	5.8	36.1	em
PSTS	Phosphate-binding protein PstS (PBP)	P0AG82	13	100	321	92.8	1.76	108.8	13	1.76	108.8	x-ray
PSUG	Pseudouridine-5'-phosphate glycosidase (PsiMP glycosidase) (EC 4.2.1.70)	P33025	4	100	277	88.8	2.12	259.1	7	2.14	199.2	x-ray
PTH	Peptidyl-tRNA hydrolase	P0A7D1/D6J9H8	3	100	190	97.9	2.27	145	6	2.6	133.1	x-ray
PTSH	Phosphocarrier protein HPr (EC 2.7.11.-) (Histidine-containing protein)	P0AA04	9	90	83	97.6	2.14	80.8	9	2.14	80.8	x-ray
PURA	Adenylosuccinate synthetase (AMPSase) (AdSS) (EC 6.3.4.4) (IMP--aspartate ligase)	P0A7D4	24	100	431	99.8	2.44	79	24	2.44	79	x-ray
PURB	Adenylosuccinate lyase (ASL) (EC 4.3.2.2) (Adenylosuccinase) (ASase)	P0AB89/Q8X737	3	75	407	89.3	1.92	596.8	4	1.94	495.9	x-ray
PURC	Phosphoribosylaminoimidazole-succinocarboxamide synthase	P0A7D7	2	100	237	100	2.03		4	2.03	298.8	x-ray
PURE	N5-carboxyaminoimidazole ribonucleotide mutase (N5-CAIR mutase) (EC 5.4.99.18) (5-(carboxyamino)imidazole ribonucleotide mutase)	P0AG18	6	100	160	94.7	1.99	229.7	6	1.99	229.7	x-ray
PURF	Amidophosphoribosyltransferase (ATase) (EC 2.4.2.14) (Glutamine phosphoribosylpyrophosphate amidotransferase) (GPATase)	P0AG16	5	100	482	95.4	2.38	145	5	2.38	145	x-ray
PURK	N5-carboxyaminoimidazole ribonucleotide synthase (N5-CAIR synthase) (EC 6.3.4.18) (5-(carboxyamino)imidazole ribonucleotide synthetase)	P09029	4	100	226	63.7	1.95	199.3	7	1.93	168.3	x-ray
PURM	Phosphoribosylformylglycinamidine cyclo-ligase	P08178	1	100	325	94.2	2.5		4	2.5	191.3	x-ray
PURN	Phosphoribosylglycinamide formyltransferase (EC 2.1.2.2) (5'-phosphoribosylglycinamide transformylase) (GAR transformylase) (GART)	P08179	5	55.6	209	98.6	2.04	146.8	5	2.04	146.8	x-ray
PURR	HTH-type transcriptional repressor PurR (Pur regulon repressor) (Purine nucleotide synthesis repressor)	P0ACP7	22	91.7	338	99.1	2.75	227.8	22	2.75	227.8	x-ray
PURT	Formate-dependent phosphoribosylglycinamide formyltransferase	P33221	6	85.7	183	46.7	1.68	208.3	10	1.68	144.4	x-ray
PUTA	Bifunctional protein PutA [Includes: Proline dehydrogenase (EC 1.5.5.2) (Proline oxidase); Delta-1-pyrroline-5-carboxylate dehydrogenase (P5C dehydrogenase) (EC 1.2.1.88) (L-glutamate gamma-semialdehyde dehydrogenase)]	P09546	12	75	367	27.8	1.98	358.5	12	1.98	358.5	x-ray
PYKF	Pyruvate kinase I (EC 2.7.1.40) (PK-1)	P0AD61(P0AD62)	4	100	279	59.4	2.35	163.5	8	2.35	116	x-ray
PYRB	Aspartate carbamoyltransferase catalytic subunit (EC 2.1.3.2) (Aspartate transcarbamylase) (ATCase)	P0A786	55	96.5	307	98.7	2.49	73.9	55	2.49	73.9	x-ray
PYRC	Dihydroorotase (DHOase) (EC 3.5.2.3)	P05020	14	87.5	343	98.6	1.9	366.6	17	1.91	291.4	x-ray
PYRD	Dihydroorotate dehydrogenase (quinone)	P0A7E1	1	100	336	100	2.5		4	2.5	463.6	x-ray
PYRF	Orotidine 5'-phosphate decarboxylase (EC 4.1.1.23) (OMP decarboxylase) (OMPDCase) (OMPdecase)	P08244	3	100	183	74.7	2.67	182.6	6	2.67	140.8	x-ray
PYRG	CTP synthase (EC 6.3.4.2) (Cytidine 5'-triphosphate synthase) (Cytidine triphosphate synthetase) (CTP synthetase) (CTPS) (UTP--ammonia ligase)	P0A7E5	3	100	427	78.3	2.6	317.4	6	2.6	199.1	x-ray
PYRG	CTP synthase (EC 6.3.4.2) (Cytidine 5'-triphosphate synthase) (Cytidine triphosphate synthetase) (CTP synthetase) (CTPS) (UTP--ammonia ligase)	P0A7E5	3	100	427	78.3	6.07	56149.1	12	6.07	319	em
PYRH	Uridylate kinase (UK) (EC 2.7.4.22) (Uridine monophosphate kinase) (UMP kinase) (UMPK)	P0A7E9	3	75	215	89.2	2.57	148.5	5	2.62	121	x-ray
PYRI	Aspartate carbamoyltransferase regulatory chain	P0A7F3	53	98.1	143	93.5	2.51	42.1	53	2.51	42.1	x-ray
QUED	6-carboxy-5,6,7,8-tetrahydropterin synthase (CPH4 synthase) (EC 4.1.2.50) (Queuosine biosynthesis protein QueD)	P65870	4	100	118	97.5	2.14	173.7	8	1.93	160.3	x-ray
RAIA	Ribosome-associated inhibitor A (Protein Y) (pY) (Ribosome associated factor Y) (Spot Y)	P0AD49	5	100	94	83.2	2.68	175.8	5	2.68	175.8	x-ray
RAPA	RNA polymerase-associated protein RapA	P60240/B7MAI2	2	100	961	99.3	3.95		4	3.95	109	x-ray
RAPZ	RNase adapter protein RapZ	P0A894	2	66.7	149	52.5	3.33		3	3.3	162.1	x-ray
RAVA	ATPase RavA	P31473	1	33.3	231	46.4	11		3	11	1038	em
RBSB	Ribose import binding protein RbsB	P02925	7	100	271	91.6	2.1	87.1	7	2.1	87.1	x-ray
RBSK	Ribokinase (RK) (EC 2.7.1.15)	P0A9J6	5	100	305	98.7	2.23	162.2	5	2.23	162.2	x-ray
RCDA	HTH-type transcriptional regulator RcdA (Regulator of csgD)	P75811	1	100	152	85.4	2.55		5	2.55	99.3	x-ray
RCSB	Transcriptional regulatory protein RcsB (Capsular synthesis regulator component B)	P0DMC7	3	100	131	60.6	2.84	122	4	2.98	99.2	x-ray
RDGB	dITP/XTP pyrophosphatase (EC 3.6.1.66) (Deoxyribonucleoside triphosphate pyrophosphohydrolase) (Inosine triphosphate pyrophosphatase) (ITPase) (Non-canonical purine NTP pyrophosphatase) (Non-standard purine NTP pyrophosphatase) (Nucleoside-triphosphate diphosphatase) (Nucleoside-triphosphate pyrophosphatase) (NTPase)	P52061	3	100	193	98	1.82	174.6	4	1.86	130.2	x-ray
RECB	RecBCD enzyme subunit RecB	P08394	2	100	870	73.7	3.35		4	3.35	494.9	x-ray
RECC	RecBCD enzyme subunit RecC	P07648	2	100	1121	99.9	3.35		3	3.43	641.9	x-ray
RELE	mRNA interferase RelE (EC 3.1.-.-) (Endoribonuclease RelE) (Toxin RelE)	P0C077	5	100	82	86.3	2.77	59	5	2.77	59	x-ray
RFAC	Lipopolysaccharide heptosyltransferase 1	P24173/Q1R4X0/A0A0H2VC26/A0A152KUZ3	4	100	284	89	2.25	237	6	2.29	176.5	x-ray
RFAH	Transcription antitermination protein RfaH	P0AFW0	2	100	96	59.3	2.1		6	2.1	134.2	x-ray
RFBA	Glucose-1-phosphate thymidylyltransferase 1 (G1P-TT 1) (EC 2.7.7.24) (dTDP-glucose pyrophosphorylase 1) (dTDP-glucose synthase 1)	P37744	3	100	290	99	2.03	403	12	2.03	133.7	x-ray
RHAA	L-rhamnose isomerase (EC 5.3.1.14)	P32170	3	100	354	84.5	1.97	394.2	9	1.97	226.5	x-ray
RHAB	L-Rhamnulokinase (RhaB) (RhuK) (EC 2.7.1.5) (ATP:L-rhamnulose phosphotransferase) (L-rhamnulose 1-kinase) (Rhamnulose kinase)	P32171	4	100	478	97.8	2.04	192.8	5	2.12	188.7	x-ray
RHAD	Rhamnulose-1-phosphate aldolase (EC 4.1.2.19)	P32169	15	100	272	99.3	1.83	141.3	15	1.83	141.3	x-ray
RHAM	L-rhamnose mutarotase	P32156	1	100	104	100	1.8		4	1.8	458	x-ray
RHMA	2-keto-3-deoxy-L-rhamnonate aldolase (KDR aldolase) (EC 4.1.2.53) (2-dehydro-3-deoxyrhamnonate aldolase) (2-keto-3-deoxy acid sugar aldolase)	P76469	2	100	256	95.9	1.66		6	1.66	286.3	x-ray
RHO	Transcription termination factor Rho (EC 3.6.4.-) (ATP-dependent helicase Rho)	P0AG30/P0AG32	5	35.7	324	77.3	3.05	92.3	5	3.05	92.3	x-ray
RIBA	GTP cyclohydrolase-2	P0A7I7	2	100	116	59.2	2.07		3	2.25	501.9	x-ray
RIBB	3,4-dihydroxy-2-butanone 4-phosphate synthase	P0A7J0	2	100	119	54.8	1.48		4	1.48	395.1	x-ray
RIBC	Riboflavin synthase (RS) (EC 2.5.1.9)	P0AFU8	2	100	87	40.8	2.3		5	2.24	127.7	x-ray
RIBD	Riboflavin biosynthesis protein RibD [Includes: Diaminohydroxyphosphoribosylaminopyrimidine deaminase (DRAP deaminase) (EC 3.5.4.26) (Riboflavin-specific deaminase); 5-amino-6-(5-phosphoribosylamino)uracil reductase (EC 1.1.1.193) (HTP reductase)]	P25539/Q3ZUB0	3	100	169	46	2.87	201.7	6	2.87	103.7	x-ray
RIHA	Pyrimidine-specific ribonucleoside hydrolase RihA	P41409	2	100	137	44.1	1.94		5	2.04	534.2	x-ray
RIHB	Pyrimidine-specific ribonucleoside hydrolase RihB (EC 3.2.2.8) (Cytidine/uridine-specific hydrolase)	P33022	3	75	308	98.4	2.07	480.4	7	1.93	303.4	x-ray
RIMK	Ribosomal protein S6--L-glutamate ligase	P0C0U4	3	75	289	96.3	2.6	280.4	10	2.22	122.5	x-ray
RLMB	23S rRNA (guanosine-2'-O-)-methyltransferase RlmB (EC 2.1.1.185) (23S rRNA (guanosine2251 2'-O)-methyltransferase) (23S rRNA Gm2251 2'-O-methyltransferase)	P63177	1	100	242	99.6	2.5		6	2.5	87.6	x-ray
RLMD	23S rRNA (uracil(1939)-C(5))-methyltransferase RlmD	P55135	2	100	416	96.1	2.05		3	2.08	171.5	x-ray
RLMH	Ribosomal RNA large subunit methyltransferase H (EC 2.1.1.177) (23S rRNA (pseudouridine1915-N3)-methyltransferase) (23S rRNA m3Psi1915 methyltransferase) (rRNA (pseudouridine-N3-)-methyltransferase RlmH)	P0A8I8	3	75	152	98.1	2.03	241.7	6	2.03	138.6	x-ray
RLMJ	Ribosomal RNA large subunit methyltransferase J (EC 2.1.1.266) (23S rRNA (adenine(2030)-N6)-methyltransferase) (23S rRNA m6A2030 methyltransferase)	P37634/A0A0G3KF30	6	100	221	78.9	1.82	174.2	12	1.92	151.4	x-ray
RLMM	Ribosomal RNA large subunit methyltransferase M (EC 2.1.1.186) (23S rRNA (cytidine2498-2'-O)-methyltransferase) (23S rRNA 2'-O-ribose methyltransferase RlmM)	P0ADR6	3	100	355	97	2.15	342	4	2.09	233.7	x-ray
RLMN	Dual-specificity RNA methyltransferase RlmN (EC 2.1.1.192) (23S rRNA (adenine(2503)-C(2))-methyltransferase) (23S rRNA m2A2503 methyltransferase) (Ribosomal RNA large subunit methyltransferase N) (tRNA (adenine(37)-C(2))-methyltransferase) (tRNA m2A37 methyltransferase)	P36979/C9QPQ6	6	100	333	86.7	2.39	143.1	9	2.42	133.5	x-ray
RLUA	Ribosomal large subunit pseudouridine synthase A	P0AA37	1	100	214	97.7	2.05		4	2.05	259.8	x-ray
RLUB	Ribosomal large subunit pseudouridine synthase B	P37765	2	100	185	63.6	1.9		3	1.7	115.1	x-ray
RLUC	Ribosomal large subunit pseudouridine synthase C	P0AA39	2	100	225	70.5	2.1		3	2.07	236.6	x-ray
RLUD	Ribosomal large subunit pseudouridine synthase D (EC 5.4.99.23) (23S rRNA pseudouridine(1911/1915/1917) synthase) (rRNA pseudouridylate synthase D) (rRNA-uridine isomerase D)	P33643	4	100	249	76.4	1.84	160	4	1.84	160	x-ray
RLUE	Ribosomal large subunit pseudouridine synthase E	P75966	2	100	121	55.8	1.4		3	1.47	165.3	x-ray
RLUF	23S rRNA pseudouridine(2604) synthase (EC 5.4.99.21) (Ribosomal large subunit pseudouridine synthase F) (rRNA pseudouridylate synthase F) (rRNA-uridine isomerase F)	P32684	2	100	175	60.3	2.8		6	2.87	129.9	x-ray
RMF	Ribosome modulation factor	P0AFW2	2	100	53	96.4	5.45		3	6.27	51739.3	em
RNA	Ribonuclease I (RNase I) (EC 3.1.27.6) (Enterobacter ribonuclease)	P21338	4	100	245	91.4	1.81	193.6	4	1.81	193.6	x-ray
RNB	Exoribonuclease 2 (EC 3.1.13.1) (Exoribonuclease II) (RNase II) (Ribonuclease II)	P30850	3	100	448	69.6	2.51	133.1	6	2.43	102	x-ray
RNHA	Ribonuclease HI (RNase HI) (EC 3.1.26.4) (Ribonuclease H) (RNase H)	P0A7Y4	31	73.8	150	96.8	1.94	81.9	31	1.94	81.9	x-ray
RNT	Ribonuclease T (EC 3.1.13.-) (Exoribonuclease T) (RNase T)	P30014	16	100	201	93.5	2.16	119.5	16	2.16	119.5	x-ray
ROB	Right origin-binding protein	P0ACI0	1	100	267	92.4	2.7		4	2.7	230.4	x-ray
ROXA	50S ribosomal protein L16 3-hydroxylase (EC 1.14.11.47) (Ribosomal oxygenase RoxA) (ROX)	P27431	5	100	211	56.6	2.62	154.1	6	2.62	140.9	x-ray
RPIA	Ribose-5-phosphate isomerase A	P0A7Z0	2	66.7	218	99.5	2		4	2	212.3	x-ray
RPIB	Ribose-5-phosphate isomerase B (EC 5.3.1.6) (Phosphoriboisomerase B)	P37351	2	100	146	98	2.15		10	2.14	200.1	x-ray
RPLB	50S ribosomal protein L2 (Large ribosomal subunit protein uL2)	P60422	42	95.5	267	97.8	3.23	57.8	42	3.23	57.8	x-ray
RPLC	50S ribosomal protein L3	P60438	43	84.3	209	100	3.24	60.3	43	3.24	60.3	x-ray
RPLD	50S ribosomal protein L4 (Large ribosomal subunit protein uL4)	P60723	42	95.5	201	100	3.23	73.1	42	3.23	73.1	x-ray
RPLE	50S ribosomal protein L5	P62399	42	95.5	177	98.9	3.23	47.1	42	3.23	47.1	x-ray
RPLF	50S ribosomal protein L6 (Large ribosomal subunit protein uL6)	P0AG55	39	100	176	99.4	3.21	70	39	3.21	70	x-ray
RPLI	50S ribosomal protein L9	P0A7R1	39	90.7	149	100	3.23	28	39	3.23	28	x-ray
RPLJ	50S ribosomal protein L10 (50S ribosomal protein L8) (Large ribosomal subunit protein uL10)	P0A7J3	11	100	135	81.8	2.99	24	11	2.99	24	x-ray
RPLK	50S ribosomal protein L11 (Large ribosomal subunit protein uL11)	P0A7J7	42	100	134	94.4	3.23	28.7	42	3.23	28.7	x-ray
RPLM	50S ribosomal protein L13	P0AA10/P0AA11	40	90.9	142	100	3.22	80.9	40	3.22	80.9	x-ray
RPLN	50S ribosomal protein L14	P0ADY3/P0ADY6	31	70.5	122	99.2	3.1	88.5	31	3.1	88.5	x-ray
RPLO	50S ribosomal protein L15 (Large ribosomal subunit protein uL15)	P02413	42	100	143	99.3	3.23	40.6	42	3.23	40.6	x-ray
RPLP	50S ribosomal protein L16	P0ADY7	43	97.7	136	100	3.24	36.1	43	3.24	36.1	x-ray
RPLQ	50S ribosomal protein L17	P0AG44/P0AG46	43	97.7	120	94.5	3.24	57.9	43	3.24	57.9	x-ray
RPLR	50S ribosomal protein L18	P0C018	43	97.7	116	99.1	3.24	37	43	3.24	37	x-ray
RPLS	50S ribosomal protein L19 (Large ribosomal subunit protein bL19)	P0A7K6	42	100	114	99.1	3.23	29.1	42	3.23	29.1	x-ray
RPLT	50S ribosomal protein L20	P0A7L3	43	97.7	117	99.2	3.24	96.9	43	3.24	96.9	x-ray
RPLU	50S ribosomal protein L21	P0AG48	43	97.7	103	100	3.24	31	43	3.24	31	x-ray
RPLV	50S ribosomal protein L22	P61175	43	97.7	110	100	3.24	72.9	43	3.24	72.9	x-ray
RPLW	50S ribosomal protein L23	P0ADZ0	43	97.7	93	93	3.24	42.8	43	3.24	42.8	x-ray
RPLX	50S ribosomal protein L24	P60624	42	97.7	102	98.1	3.23	40.1	42	3.23	40.1	x-ray
RPLY	50S ribosomal protein L25 (Large ribosomal subunit protein bL25)	P68919	43	95.6	94	100	3.19	63.1	43	3.19	63.1	x-ray
RPMA	50S ribosomal protein L27	P0A7L8	23	51.1	79	92.9	3.45	22.8	23	3.45	22.8	x-ray
RPMB	50S ribosomal protein L28	P0A7M2	40	97.6	77	98.7	3.22	78.6	40	3.22	78.6	x-ray
RPMC	50S ribosomal protein L29	P0A7M6	35	79.5	63	100	3.32	30.2	35	3.32	30.2	x-ray
RPMD	50S ribosomal protein L30	P0AG51	40	97.6	58	98.3	3.23	49.3	40	3.23	49.3	x-ray
RPME	50S ribosomal protein L31	P0A7M9	3	75	70	100	3.55	124	6	3.55	47.4	x-ray
RPMF	50S ribosomal protein L32	P0A7N4	42	95.5	56	98.2	3.23	54.8	42	3.23	54.8	x-ray
RPMG	50S ribosomal protein L33	P0A7N9	42	95.5	50	90.9	3.23	31.4	42	3.23	31.4	x-ray
RPMH	50S ribosomal protein L34	P0A7P5	42	95.5	46	100	3.23	54.5	42	3.23	54.5	x-ray
RPMI	50S ribosomal protein L35	P0A7Q1	42	95.5	64	98.5	3.23	41.1	42	3.23	41.1	x-ray
RPMJ	50S ribosomal protein L36	P0A7Q6	42	97.7	38	100	3.23	37.1	42	3.23	37.1	x-ray
RPOA	DNA-directed RNA polymerase subunit alpha (RNAP subunit alpha) (EC 2.7.7.6) (RNA polymerase subunit alpha) (Transcriptase subunit alpha)	P0A7Z4	25	75.8	217	66	4.23	80.3	25	4.23	80.3	x-ray
RPOB	DNA-directed RNA polymerase subunit beta (RNAP subunit beta) (EC 2.7.7.6) (RNA polymerase subunit beta) (Transcriptase subunit beta)	P0A8V2	24	77.4	1335	99.5	4.21	112.1	24	4.21	112.1	x-ray
RPOB	DNA-directed RNA polymerase subunit beta (RNAP subunit beta) (EC 2.7.7.6) (RNA polymerase subunit beta) (Transcriptase subunit beta)	P0A8V2	11	35.5	1338	99.7	4.13	56	11	4.13	56	em
RPOC	DNA-directed RNA polymerase subunit beta' (RNAP subunit beta') (EC 2.7.7.6) (RNA polymerase subunit beta') (Transcriptase subunit beta')	P0A8T7	18	60	916	65.1	4.14	90	18	4.14	90	x-ray
RPOC	DNA-directed RNA polymerase subunit beta' (RNAP subunit beta') (EC 2.7.7.6) (RNA polymerase subunit beta') (Transcriptase subunit beta')	P0A8T7	4	12.9	1358	96.5	7.75	37.2	4	7.75	37.2	em
RPOD	RNA polymerase sigma factor RpoD (Sigma-70)	P00579	35	94.6	367	59.9	4.04	71.9	35	4.04	71.9	x-ray
RPOD	RNA polymerase sigma factor RpoD (Sigma-70)	P00579	5	71.4	367	59.9	7.5	47.5	5	7.5	47.5	em
RPOE	ECF RNA polymerase sigma-E factor	P0AGB6/Q0P6M2	2	66.7	87	45.5	1.6		4	1.6	144.7	x-ray
RPOS	RNA polymerase sigma factor RpoS (Sigma S) (Sigma-38)	P13445	3	100	276	83.6	4.14	479.1	3	4.14	479.1	x-ray
RPOZ	DNA-directed RNA polymerase subunit omega (RNAP omega subunit) (EC 2.7.7.6) (RNA polymerase omega subunit) (Transcriptase subunit omega)	P0A800	20	74.1	89	97.8	4.24	77.1	20	4.24	77.1	x-ray
RPOZ	DNA-directed RNA polymerase subunit omega (RNAP omega subunit) (EC 2.7.7.6) (RNA polymerase omega subunit) (Transcriptase subunit omega)	P0A800	4	13.3	89	97.8	11.2	17.5	4	11.2	17.5	em
RPPH	RNA pyrophosphohydrolase	P0A776/B7MLH6/A7ZQT6	3	37.5	158	89.8	2.34	161.8	3	2.34	161.8	x-ray
RPSB	30S ribosomal protein S2 (Small ribosomal subunit protein uS2)	P0A7V0	41	91.1	218	90.5	3.21	47.3	41	3.21	47.3	x-ray
RPSC	30S ribosomal protein S3 (Small ribosomal subunit protein uS3)	P0A7V3	41	97.6	206	88.4	3.21	74.7	41	3.21	74.7	x-ray
RPSD	30S ribosomal protein S4 (Small ribosomal subunit protein uS4)	P0A7V8	42	100	205	99.5	3.23	59.3	42	3.23	59.3	x-ray
RPSE	30S ribosomal protein S5	P0A7W1	43	97.7	150	89.8	3.24	57.2	43	3.24	57.2	x-ray
RPSF	30S ribosomal protein S6	P02358	43	97.7	100	74.1	3.24	51	43	3.24	51	x-ray
RPSG	30S ribosomal protein S7 (Small ribosomal subunit protein uS7)	P02359	42	100	150	83.8	3.23	52.9	42	3.23	52.9	x-ray
RPSH	30S ribosomal protein S8	P0A7W7	43	95.6	129	99.2	3.24	59.9	43	3.24	59.9	x-ray
RPSI	30S ribosomal protein S9 (Small ribosomal subunit protein uS9)	P0A7X3	41	100	127	97.7	3.21	55.7	41	3.21	55.7	x-ray
RPSJ	30S ribosomal protein S10	P0A7R5	42	89.4	98	95.1	3.23	62.3	42	3.23	62.3	x-ray
RPSK	30S ribosomal protein S11	P0A7R9	43	97.7	117	90.7	3.24	53.8	43	3.24	53.8	x-ray
RPSL	30S ribosomal protein S12	P0A7S3	42	97.7	123	99.2	3.23	81.1	42	3.23	81.1	x-ray
RPSM	30S ribosomal protein S13	P0A7S9	42	97.7	114	96.6	3.23	54.6	42	3.23	54.6	x-ray
RPSN	30S ribosomal protein S14	P0AG59	8	19	100	99	2.93	220.9	16	2.93	192.4	x-ray
RPSO	30S ribosomal protein S15	Q8X9M2/C3SSQ7/C3SSQ8/P0ADZ5	5	100	88	98.9	3.26	83	9	3.26	65.8	x-ray
RPSP	30S ribosomal protein S16	P0A7T3	43	97.7	82	100	3.24	48.3	43	3.24	48.3	x-ray
RPSQ	30S ribosomal protein S17	P0AG63	41	97.6	80	95.2	3.23	51.2	41	3.23	51.2	x-ray
RPSR	30S ribosomal protein S18	P0A7T7	42	97.7	55	73.3	3.23	45.8	42	3.23	45.8	x-ray
RPSS	30S ribosomal protein S19	P0A7U3	43	97.7	79	85.9	3.24	37.8	43	3.24	37.8	x-ray
RPST	30S ribosomal protein S20	P0A7U7	43	95.6	85	97.7	3.24	60.9	43	3.24	60.9	x-ray
RPSU	30S ribosomal protein S21	P68679/P68680	41	97.6	51	71.8	3.23	27	41	3.23	27	x-ray
RRAA	Regulator of ribonuclease activity A	P0A8R0	3	100	158	98.1	2.57	212.4	6	2.57	132.4	x-ray
RRRD	Lysozyme RrrD	P78285	1	100	165	100	2.4		4	2.4	106	x-ray
RSEB	Sigma-E factor regulatory protein RseB	P0AFX9	4	100	183	57.5	2.46	135.4	4	2.46	135.4	x-ray
RSEP	Regulator of sigma-E protease RseP	P0AEH1	4	66.7	84	18.7	1.92	76.7	6	2.13	65.8	x-ray
RSGA	Small ribosomal subunit biogenesis GTPase RsgA	P39286	3	50	313	89.4	5.16	957.8	3	5.16	957.8	em
RSMA	Ribosomal RNA small subunit methyltransferase A	P06992	2	100	251	91.9	2.1		4	2.1	137.4	x-ray
RSMD	Ribosomal RNA small subunit methyltransferase D (EC 2.1.1.171) (16S rRNA m2G966 methyltransferase) (rRNA (guanine-N(2)-)-methyltransferase)	P0ADX9	1	100	157	79.3	2.05		5	2.05	216.9	x-ray
RSMF	Ribosomal RNA small subunit methyltransferase F	P76273	1	100	390	81.4	2.9		4	2.9	894.4	x-ray
RSMI	Ribosomal RNA small subunit methyltransferase I	P67087	1	100	165	57.7	2.21		3	2.21	426.9	x-ray
RSUA	Ribosomal small subunit pseudouridine synthase A (EC 5.4.99.19) (16S pseudouridylate 516 synthase) (16S rRNA pseudouridine(516) synthase) (rRNA pseudouridylate synthase A) (rRNA-uridine isomerase A)	P0AA43	3	100	231	100	2.25	171.1	3	2.25	171.1	x-ray
RTCA	RNA 3'-terminal phosphate cyclase (RNA cyclase) (RNA-3'-phosphate cyclase) (EC 6.5.1.4)	P46849	7	100	334	98.8	2	102.3	7	2	102.3	x-ray
RUSA	Crossover junction endodeoxyribonuclease RusA (EC 3.1.22.4) (Holliday junction nuclease RusA) (Holliday junction resolvase)	P0AG74	3	100	116	96.7	2.07	146.7	4	2.33	98	x-ray
RUTC	Putative aminoacrylate peracid reductase RutC	P0AFQ6	1	100	110	85.9	1.95		6	1.95	359.3	x-ray
RUTR	HTH-type transcriptional regulator RutR (Rut operon repressor)	P0ACU2/P0ACU3	4	100	196	92.5	2.22	97.9	7	2.19	95.4	x-ray
RUVA	Holliday junction ATP-dependent DNA helicase RuvA (EC 3.6.4.12)	P0A809	5	100	140	69	3.2	104.9	5	3.2	104.9	x-ray
RUVC	Crossover junction endodeoxyribonuclease RuvC	P0A814	1	100	158	91.3	2.5		4	2.5	87.5	x-ray
SATP	Succinate-acetate/proton symporter SatP	P0AC98	1	100	181	96.3	2.8		6	2.8	213.8	x-ray
SBCB	Exodeoxyribonuclease I (ExoI) (Exonuclease I) (EC 3.1.11.1) (DNA deoxyribophosphodiesterase) (dRPase)	P04995	12	100	149	31.4	2.33	121.5	12	2.33	121.5	x-ray
SBCD	Nuclease SbcCD subunit D	P0AG76(E8Y9D8)	3	100	339	84.8	2.04	378.4	6	2.04	267.8	x-ray
SCPB	Methylmalonyl-CoA decarboxylase	P52045	7	87.5	259	99.2	1.87	277.5	13	1.81	246.1	x-ray
SDHA	Succinate dehydrogenase flavoprotein subunit (EC 1.3.5.1)	P0AC41	10	100	588	100	2.86	206.1	10	2.86	206.1	x-ray
SDHB	Succinate dehydrogenase iron-sulfur subunit (EC 1.3.5.1)	P07014	10	100	238	100	2.86	223.9	10	2.86	223.9	x-ray
SDHC	Succinate dehydrogenase cytochrome b556 subunit (Cytochrome b-556)	P69054	10	100	121	93.8	2.86	189.6	10	2.86	189.6	x-ray
SDHD	Succinate dehydrogenase hydrophobic membrane anchor subunit	P0AC44	10	100	105	91.3	2.86	184.9	10	2.86	184.9	x-ray
SDHE	FAD assembly factor SdhE (Antitoxin CptB)	P64559/P64561	4	100	78	88.6	1.99	99.8	7	1.99	64.3	x-ray
SDIA(ECS2654)	Regulatory protein SdiA	P07026/Q8XBD0	5	100	236	98.3	2.75	142.8	9	2.79	106.5	x-ray
SECA	Protein translocase subunit SecA	P10408	4	66.7	464	51.5	2.08	354.2	8	2.08	187.9	x-ray
SECB	Protein-export protein SecB (Chaperone SecB)	P0AG86	1	100	132	85.2	2.35		4	2.35	181.4	x-ray
SECE	Protein translocase subunit SecE	P0AG96	2	28.6	111	87.4	14.9		4	14.9	38.5	em
SECG	Protein-export membrane protein SecG	P0AG99	2	33.3	77	70	14.9		4	14.9	39	em
SECY	Protein translocase subunit SecY	P0AGA2	5	62.5	416	93.9	9.28	14.3	5	9.28	14.3	em
SEQA	Negative modulator of initiation of replication	P0AFY8	4	80	111	61.3	2.78	122.6	4	2.78	122.6	x-ray
SERA	D-3-phosphoglycerate dehydrogenase (PGDH) (EC 1.1.1.95) (2-oxoglutarate reductase) (EC 1.1.1.399)	P0A9T0	6	85.7	404	98.5	2.6	112.5	6	2.6	112.5	x-ray
SERC	Phosphoserine aminotransferase	P23721	2	100	360	99.4	2.55		4	2.55	605	x-ray
SKP	Chaperone protein Skp	P0AEU7	2	100	141	87.6	2.33		3	2.33	143.9	x-ray
SLMA	Nucleoid occlusion factor SlmA (Protein Ttk) (Synthetically lethal with a defective Min system protein A)	P0C093	2	66.7	189	95.5	2.69		8	2.69	82.8	x-ray
SLT	Soluble lytic murein transglycosylase (EC 4.2.2.n1) (Exomuramidase) (Peptidoglycan lytic exotransglycosylase) (Slt70)	P0AGC3	3	100	618	95.8	2.12	411	3	2.12	411	x-ray
SODA	Superoxide dismutase [Mn] (EC 1.15.1.1) (MnSOD)	P00448	13	100	205	99.5	1.73	164.2	13	1.73	164.2	x-ray
SODB	Superoxide dismutase [Fe] (EC 1.15.1.1)	P0AGD3	6	100	192	99.5	1.68	262	6	1.68	262	x-ray
SOLA	N-methyl-L-tryptophan oxidase	P40874	1	100	369	99.2	3.2		4	3.2	255.5	x-ray
SPEE	Polyamine aminopropyltransferase	P09158	1	100	255	88.5	2.9		4	2.9	1005.6	x-ray
SPEG	Spermidine N(1)-acetyltransferase	P0A951/A0A0M3KKU5	3	100	144	77.4	2.38	130.1	8	2.56	92.2	x-ray
SPPA	Protease 4 (EC 3.4.21.-) (Endopeptidase IV) (Protease IV) (Signal peptide peptidase)	P08395	2	100	457	73.9	2.66		8	2.66	208.9	x-ray
SPY	Periplasmic chaperone Spy (Spheroplast protein Y)	P77754/Q8XDZ4/C6ECL5	3	30	91	56.5	2.36	87.6	8	2.44	55.1	x-ray
SSB	Single-stranded DNA-binding protein (SSB) (Helix-destabilizing protein)	P0AGE0	4	40	112	62.9	2.6	67.2	4	2.6	67.2	x-ray
SSPB	Stringent starvation protein B (Adapter protein SspB) (Specificity-enhancing factor SspB)	P0AFZ3	3	100	107	64.8	2.3	176.9	6	2.3	110.3	x-ray
SSUD	Alkanesulfonate monooxygenase	P80645	2	100	249	65.4	2.25		3	2.27	251.1	x-ray
SSUE	FMN reductase (NADPH) (EC 1.5.1.38) (FMN reductase) (Sulfate starvation-induced protein 4) (SSI4)	P80644	5	83.3	173	90.6	1.99	110	9	2.02	97	x-ray
SUCB	Dihydrolipoyllysine-residue succinyltransferase component of 2-oxoglutarate dehydrogenase complex	P0AFG6/A0A0K4N9D8	3	75	218	53.8	2.73	226.6	8	2.9	174.6	x-ray
SUCC	Succinate--CoA ligase [ADP-forming] subunit beta (EC 6.2.1.5) (Succinyl-CoA synthetase subunit beta) (SCS-beta)	P0A836	11	100	385	99.2	2.62	85.9	11	2.62	85.9	x-ray
SUCD	Succinate--CoA ligase [ADP-forming] subunit alpha (EC 6.2.1.5) (Succinyl-CoA synthetase subunit alpha) (SCS-alpha)	P0AGE9	11	100	286	99	2.62	89.6	11	2.62	89.6	x-ray
SUFB	FeS cluster assembly protein SufB	P77522	2	100	334	67.5	3.62		4	3.62	131.6	x-ray
SUFC	Probable ATP-dependent transporter SufC	P77499	4	100	239	96.4	2.99	68.6	5	2.98	67.2	x-ray
SUFD	FeS cluster assembly protein SufD	P77689	4	100	361	85.3	2.8	161.9	7	2.59	156.3	x-ray
SUFS	Cysteine desulfurase (EC 2.8.1.7) (Selenocysteine beta-lyase) (SCL) (Selenocysteine lyase) (EC 4.4.1.16) (Selenocysteine reductase)	P77444	14	93.3	404	99.5	2.29	232.9	15	2.32	225.1	x-ray
SUHB	Inositol-1-monophosphatase	P0ADG4	3	100	220	82.4	1.93	202.9	4	1.86	147	x-ray
SURA	Chaperone SurA	P0ABZ6	2	50	139	32.5	3.2		6	3.13	89.7	x-ray
TALB	Transaldolase B (EC 2.2.1.2)	P0A870	12	100	316	99.7	1.96	182.1	12	1.96	182.1	x-ray
TAR	Methyl-accepting chemotaxis protein II (MCP-II) (Aspartate chemoreceptor protein)	P07017	4	100	142	25.7	1.78	287.8	4	1.78	287.8	x-ray
TATD	3'-5' ssDNA/RNA exonuclease TatD (EC 3.1.11.-) (EC 3.1.13.-) (DNase TatD)	P27859	3	100	260	100	2.3	205.1	3	2.3	205.1	x-ray
TAUD	Alpha-ketoglutarate-dependent taurine dioxygenase (EC 1.14.11.17) (2-aminoethanesulfonate dioxygenase) (Sulfate starvation-induced protein 3) (SSI3)	P37610	3	75	279	98.6	2.3	244.3	9	2.23	109.7	x-ray
TCDA	tRNA threonylcarbamoyladenosine dehydratase (EC 6.1.-.-) (t(6)A37 dehydratase)	Q46927	5	100	213	79.5	1.9	361.8	10	1.88	229.9	x-ray
TDCF	Putative reactive intermediate deaminase TdcF (EC 3.5.4.-)	P0AGL2	4	100	127	98.4	2	377.6	4	2	377.6	x-ray
TEHB	Tellurite methyltransferase (EC 2.1.1.265) (Chalcogen-detoxifying protein TehB) (Selenite methyltransferase) (Tellurite resistance protein TehB)	P25397/Q8X9V6	3	100	176	89.3	1.86	247.4	9	1.91	132.5	x-ray
TESA	Thioesterase 1/protease 1/lysophospholipase L1 (TAP) (Acyl-CoA thioesterase 1) (TESA) (EC 3.1.2.2) (Acyl-CoA thioesterase I) (Arylesterase) (EC 3.1.1.2) (Lysophospholipase L1) (EC 3.1.1.5) (Oleoyl-[acyl-carrier-protein] hydrolase) (EC 3.1.2.14) (Phospholipid degradation C) (Pldc) (Protease 1) (EC 3.4.21.-) (Protease I) (Thioesterase I/protease I) (TEP-I)	P0ADA1	9	100	145	69.7	1.66	137.2	9	1.66	137.2	x-ray
THIB	Thiamine-binding periplasmic protein	P31550	1	100	308	94.2	2.25		4	2.25	302.4	x-ray
THIF	Sulfur carrier protein ThiS adenylyltransferase (EC 2.7.7.73)	P30138	3	100	175	69.7	2.56	245.5	8	2.63	135	x-ray
THPR	RNA 2',3'-cyclic phosphodiesterase	A0A140NFI1	7	87.5	174	98.9	2.23	152.1	8	2.17	152.2	x-ray
THRS	Threonine--tRNA ligase (EC 6.1.1.3) (Threonyl-tRNA synthetase) (ThrRS)	P0A8M3	11	73.3	398	62	2.14	122.9	11	2.14	122.9	x-ray
THYA	Thymidylate synthase (TS) (TSase) (EC 2.1.1.45)	P0A884	64	98.5	260	98.5	2.1	106	64	2.1	106	x-ray
TKTA	Transketolase 1 (TK 1) (EC 2.2.1.1)	P27302	5	100	662	99.8	1.62	305.8	10	1.62	261.8	x-ray
TLDD	Metalloprotease TldD (EC 3.4.-.-)	P0AGG8	6	100	480	99.8	1.47	194	6	1.47	194	x-ray
TNAA	Tryptophanase (EC 4.1.99.1) (L-tryptophan indole-lyase) (TNase)	P0A853	5	83.3	396	84.1	2.56	124.4	5	2.56	124.4	x-ray
TOLA	Tol-Pal system protein TolA	P19934/Q8X965	4	100	88	20.9	2.28	57.4	5	2.32	56.5	x-ray
TOLB	Protein TolB	P0A855	6	100	381	88.6	1.99	105.4	6	1.99	105.4	x-ray
TOLC	Outer membrane protein TolC (Multidrug efflux pump subunit TolC) (Outer membrane factor TolC)	P02930	6	100	428	86.8	2.85	200.7	6	2.85	200.7	x-ray
TOLC	Outer membrane protein TolC (Multidrug efflux pump subunit TolC) (Outer membrane factor TolC)	P02930	5	100	428	86.8	5.5	43.2	10	5.5	41.6	em
TONB	Protein TonB	P02929	5	100	69	28.9	2.16	31.7	5	2.16	31.7	x-ray
TOPB	DNA topoisomerase 3 (EC 5.99.1.2) (DNA topoisomerase III)	P14294	6	85.7	617	94.5	2.39	110.7	6	2.39	110.7	x-ray
TORR	TorCAD operon transcriptional regulatory protein TorR	P38684	1	100	120	52.2	1.8		4	1.8	98	x-ray
TPIA	Triosephosphate isomerase (TIM) (TPI) (EC 5.3.1.1) (Triose-phosphate isomerase)	P0A858/B1XB85/(C5A086/H0QFE6)	5	100	238	93.3	2.1	210	10	2.1	145.6	x-ray
TPX	Thiol peroxidase (EC 1.11.1.-) (Scavengase P20)	P0A862	6	100	164	97.6	2.11	89.9	6	2.11	89.9	x-ray
TREA	Periplasmic trehalase (EC 3.2.1.28) (Alpha,alpha-trehalase) (Alpha,alpha-trehalose glucohydrolase) (Tre37A)	P13482	4	100	394	69.7	1.93	280.4	4	1.93	280.4	x-ray
TRMB	tRNA (guanine-N(7)-)-methyltransferase (EC 2.1.1.33) (tRNA (guanine(46)-N(7))-methyltransferase) (tRNA(m7G46)-methyltransferase)	P0A8I5	3	100	185	77.4	1.71	332.7	3	1.71	332.7	x-ray
TRMJ	tRNA (cytidine/uridine-2'-O-)-methyltransferase TrmJ (EC 2.1.1.200) (tRNA (cytidine(32)/uridine(32)-2'-O)-methyltransferase) (tRNA Cm32/Um32 methyltransferase)	P0AE01	3	100	163	66.3	2	190.4	3	2	190.4	x-ray
TRML	tRNA (cytidine(34)-2'-O)-methyltransferase (EC 2.1.1.207) (tRNA (cytidine/uridine-2'-O-)-methyltransferase TrmL)	P0AGJ7/Q1R4Y9	3	100	153	97.5	2.11	207.2	5	2.06	191.8	x-ray
TRPR	Trp operon repressor	P0A881	19	90.5	97	89.8	1.75	47.4	19	1.75	47.4	x-ray
TRUA	tRNA pseudouridine synthase A (EC 5.4.99.12) (tRNA pseudouridine(38-40) synthase) (tRNA pseudouridylate synthase I) (PSU-I) (tRNA-uridine isomerase I)	P07649	3	75	264	97.8	2.97	226.4	8	3.15	164.9	x-ray
TRUD	tRNA pseudouridine synthase D (EC 5.4.99.27) (tRNA pseudouridine(13) synthase) (tRNA pseudouridylate synthase D) (tRNA-uridine isomerase D)	Q57261	2	66.7	340	97.4	2.2		3	2.2	285.2	x-ray
TRXA	Thioredoxin 1 (Trx-1)	P0AA25	59	95.2	103	94.5	2.29	56.6	59	2.29	56.6	x-ray
TRXB	Thioredoxin reductase (TRXR) (EC 1.8.1.9)	P0A9P4	5	100	316	98.4	2.37	108.5	5	2.37	108.5	x-ray
TSAB	tRNA threonylcarbamoyladenosine biosynthesis protein TsaB (t(6)A37 threonylcarbamoyladenosine biosynthesis protein TsaB)	P76256	4	100	218	94.4	2.32	178.1	9	2.31	128.8	x-ray
TSAD	tRNA N6-adenosine threonylcarbamoyltransferase (EC 2.3.1.234) (N6-L-threonylcarbamoyladenine synthase) (t(6)A synthase) (t(6)A37 threonylcarbamoyladenosine biosynthesis protein TsaD) (tRNA threonylcarbamoyladenosine biosynthesis protein TsaD)	P05852	3	100	332	98.5	2.33	332.2	3	2.33	212.5	x-ray
TSF	Elongation factor Ts (EF-Ts) (Bacteriophage Q beta RNA-directed RNA polymerase subunit IV)	P0A6P1	5	83.3	278	98.2	2.59	107.4	5	2.59	107.4	x-ray
TSR	Methyl-accepting chemotaxis protein I	P02942	2	50	218	39.6	2.63		4	2.63	128.9	x-ray
TSX	Nucleoside-specific channel-forming protein tsx	P0A927	3	100	198	67.3	3.07	595	6	3.07	388.3	x-ray
TUFA	Elongation factor Tu 1 (EF-Tu 1) (Bacteriophage Q beta RNA-directed RNA polymerase subunit III) (P-43)	P0CE47	13	81.3	328	83.2	2.6	48.9	13	2.6	48.9	x-ray
TUFA	Elongation factor Tu 1 (EF-Tu 1) (Bacteriophage Q beta RNA-directed RNA polymerase subunit III) (P-43)	P0CE47	10	100	392	99.5	5.91	30	10	5.91	30	em
TUFB	Elongation factor Tu 2 (EF-Tu 2) (Bacteriophage Q beta RNA-directed RNA polymerase subunit III) (P-43)	P0CE48	6	75	330	83.8	2.73	54	6	2.73	54	x-ray
TUFB	Elongation factor Tu 2 (EF-Tu 2) (Bacteriophage Q beta RNA-directed RNA polymerase subunit III) (P-43)	P0CE48	8	88.9	386	98	7.64	30.2	8	7.64	30.2	em
TUS	DNA replication terminus site-binding protein (Ter-binding protein)	P16525	8	100	305	98.7	2.56	144.2	8	2.56	144.2	x-ray
TUSA	Sulfur carrier protein TusA	P0A892	2	100	76	93.8	2.44		3	2.43	297.7	x-ray
TUSB	Protein TusB	P45530	1	100	95	100	2.15		3	2.15	546	x-ray
TUSC	Protein TusC	P45531	1	100	118	99.2	2.15		3	2.15	606.1	x-ray
TUSD	Sulfurtransferase TusD	P45532	1	100	128	100	2.15		3	2.15	639.1	x-ray
TYNA	Primary amine oxidase (EC 1.4.3.21) (2-phenylethylamine oxidase) (Copper amine oxidase) (Tyramine oxidase)	P46883	17	94.4	718	94.8	2.21	280.2	22	2.21	246.9	x-ray
TYPA	GTP-binding protein TypA/BipA (Tyrosine phosphorylated protein A)	P32132	3	42.9	484	79.7	3	377.1	6	3	259.1	x-ray
TYRB	Aromatic-amino-acid aminotransferase (ARAT) (AROAT) (EC 2.6.1.57) (Beta-methylphenylalanine transaminase) (EC 2.6.1.107)	P04693	2	100	397	100	2.93		6	2.93	154.7	x-ray
TYRS	Tyrosine--tRNA ligase (EC 6.1.1.1) (Tyrosyl-tRNA synthetase) (TyrRS)	P0AGJ9	6	100	318	75	2.2	184.7	6	2.2	184.7	x-ray
UBIC	Chorismate pyruvate-lyase (CL) (CPL) (EC 4.1.3.40)	P26602	7	100	164	99.4	1.78	82.4	11	1.97	67.6	x-ray
UBID	3-octaprenyl-4-hydroxybenzoate carboxy-lyase (EC 4.1.1.98) (Polyprenyl p-hydroxybenzoate decarboxylase)	P0AAB4/P0AAB5	5	100	360	72.4	2.82	83.2	5	2.82	83.2	x-ray
UBIG	Ubiquinone biosynthesis O-methyltransferase	P17993/A8A296	3	100	144	60	2.06	211.6	3	2.06	211.6	x-ray
UBIJ	Ubiquinone biosynthesis protein UbiJ	P0ADP7	3	100	113	56.2	2.11	184	8	2.21	102	x-ray
UDP	Uridine phosphorylase (UPase) (UrdPase) (EC 2.4.2.3)	P12758	15	100	222	87.7	2.22	96.6	15	2.22	96.6	x-ray
UIDA	Beta-glucuronidase (GUS) (EC 3.2.1.31) (Beta-D-glucuronoside glucuronosohydrolase)	P05804	7	100	361	59.9	2.53	169	7	2.53	169	x-ray
UIDR	HTH-type transcriptional regulator UidR	P0ACT8	1	100	140	71.4	2.09		4	2.09	260.9	x-ray
ULAA	Ascorbate-specific PTS system EIIC component (Ascorbate-specific permease IIC component UlaA)	P39301	2	100	378	81.3	2.01		3	2.12	361.3	x-ray
ULAD	3-keto-L-gulonate-6-phosphate decarboxylase UlaD (EC 4.1.1.85) (3-dehydro-L-gulonate-6-phosphate decarboxylase) (KGPDC) (L-ascorbate utilization protein D)	P39304	14	100	213	98.6	1.75	207.9	23	1.75	181.4	x-ray
ULAE	L-ribulose-5-phosphate 3-epimerase UlaE	Q8XDI5	3	75	261	91.9	2.16	657.5	5	2.17	293.4	x-ray
UMUD	Protein UmuD (EC 3.4.21.-) [Cleaved into: Protein UmuD']	P0AG11	2	100	105	75.5	2.75		4	2.75	343	x-ray
UNG	Uracil-DNA glycosylase (UDG) (EC 3.2.2.27)	P12295	13	100	220	96.1	2.21	75.6	13	2.21	75.6	x-ray
UPP	Uracil phosphoribosyltransferase	P0A8F0	1	100	207	99.5	2.8		4	2.8	208.3	x-ray
UPPP	Undecaprenyl-diphosphatase	P60933	4	80	270	98.9	2.38	291.9	4	2.38	291.9	x-ray
USHA	Protein UshA	P07024	5	55.6	523	95.1	2.08	113.4	11	2.02	97.4	x-ray
UVRD	DNA helicase II (EC 3.6.4.12)	P03018	5	100	356	49.4	2.5	58.1	5	2.5	58.1	x-ray
UXUA	Mannonate dehydratase (EC 4.2.1.8) (D-mannonate hydro-lyase)	P24215	2	100	393	99.7	2.33		8	2.33	328.3	x-ray
VSR	Very short patch repair protein (EC 3.1.-.-) (DNA mismatch endonuclease) (V.EcoKDcm) (Vsr mismatch endonuclease)	P09184	3	100	134	85.9	2.3	130.8	3	2.3	130.8	x-ray
WECB	UDP-N-acetylglucosamine 2-epimerase (EC 5.1.3.14) (Bacteriophage N4 adsorption protein C) (UDP-GlcNAc-2-epimerase)	P27828	2	100	310	82.4	2.41		6	2.41	97.6	x-ray
WECD	dTDP-fucosamine acetyltransferase	Q8FBQ3	2	100	222	99.1	1.81		4	1.81	240.4	x-ray
WECE	dTDP-4-amino-4,6-dideoxygalactose transaminase	P27833	2	100	212	56.4	2.47		12	2.39	188.8	x-ray
WRBA	NAD(P)H dehydrogenase (quinone) (EC 1.6.5.2) (Flavoprotein WrbA) (NAD(P)H:quinone oxidoreductase) (NQO)	P0A8G6/E2QJP6	10	90.9	146	73.7	1.74	194.4	15	1.85	170.3	x-ray
WZA	Putative outer membrane lipoprotein Wza	Q9X4B7	3	100	322	85	2.67	422.8	9	2.67	340.6	x-ray
WZB	Putative acid phosphatase Wzb	Q9X4B8	1	50	142	95.9	2.21		8	2.21	236.1	x-ray
WZC	Tyrosine-protein kinase wzc (EC 2.7.10.-)	P76387	1	100	223	31	3.2		16	3.2	245.2	x-ray
XAPA	Purine nucleoside phosphorylase 2 (EC 2.4.2.1) (Inosine-guanosine phosphorylase) (Purine nucleoside phosphorylase II) (PNP II) (Xanthosine phosphorylase)	P45563	3	100	172	62.1	2.97	545.9	9	2.97	465.7	x-ray
XNI(YGDG)	Flap endonuclease Xni	Q8X6R9	5	71.4	194	77.3	1.79	162	5	1.79	162	x-ray
XYLB	Xylulose kinase	P09099	2	100	333	68.8	2.4		4	2.4	162.6	x-ray
XYLE	D-xylose-proton symporter (D-xylose transporter)	P0AGF4	4	57.1	475	96.7	3	156.8	4	3	156.8	x-ray
XYLF	D-xylose-binding periplasmic protein	P37387	3	100	305	92.4	2.18	168.1	5	2.19	117.3	x-ray
XYLR	Xylose operon regulatory protein	P0ACI3	2	100	335	85.5	3.18		4	3.31	88.1	x-ray
YACG	DNA gyrase inhibitor YacG	P0A8H8	1	100	47	72.3	3.3		4	3.3	108.9	x-ray
YAFQ	mRNA interferase YafQ (EC 3.1.-.-) (Endoribonuclease YafQ) (Toxin YafQ)	Q47149	5	100	90	97.8	1.74	153.4	13	1.85	133.4	x-ray
YAGE	Probable 2-keto-3-deoxy-galactonate aldolase YagE (Probable KDGal aldolase YagE) (EC 4.1.2.-)	P75682	8	100	298	98.7	2.3	298.3	16	2.3	269.5	x-ray
PDEL(YAHA)	Cyclic di-GMP phosphodiesterase YahA (EC 3.1.4.-)	P21514	3	100	252	69.6	1.93	140.5	7	2.1	125.8	x-ray
YAJL	Protein deglycase 3 (EC 3.1.2.-) (EC 3.5.1.124) (Chaperone protein YajL)	Q46948	2	100	195	99.5	1.04		4	1.04	357.3	x-ray
YBAB	Nucleoid-associated protein YbaB	P0A8B5	1	100	71	65.1	2.2		4	2.2	109.5	x-ray
YBEY	Endoribonuclease YbeY	P0A898	1	100	148	95.5	2.7		4	2.7	350.1	x-ray
YBFF	Esterase YbfF	P75736	2	100	254	100	1.39		4	1.39	596.4	x-ray
YBGC	Acyl-CoA thioester hydrolase YbgC (Acyl-CoA thioesterase) (EC 3.1.2.-)	P0A8Z3/P0A8Z5	4	100	129	96.3	1.89	237.6	8	1.89	142.2	x-ray
YBGI	GTP cyclohydrolase 1 type 2 homolog (Radiation resistance protein YbgI)	P0AFP6	2	100	247	100	2.2		12	2.2	253.3	x-ray
YBIV	Sugar phosphatase YbiV (EC 3.1.3.23)	P75792	4	100	268	98.9	2	111.7	7	2.01	96.8	x-ray
YCAO	Ribosomal protein S12 methylthiotransferase accessory factor YcaO	P75838	2	66.7	528	90.1	2.45		6	2.38	377.3	x-ray
YCDX	Probable phosphatase YcdX (EC 3.1.3.-)	P75914	3	100	157	64.1	1.94	476.7	5	1.94	284.4	x-ray
YCEI	Protein YceI	P0A8X2	1	100	169	88.5	2.2		4	2.2	759.5	x-ray
YCGM	Uncharacterized protein YcgM	P76004	1	100	182	83.1	2.7		4	2.7	206.8	x-ray
YCHN	Protein YchN	P0AB52	1	100	117	100	2.8		6	2.8	139	x-ray
YCIK	Hypothetical oxidoreductase yciK	P31808/A0A0H2V6Y9	3	75	240	95.2	1.88	217.6	5	1.74	154.2	x-ray
YCJY	Uncharacterized protein YcjY	P76049	1	100	306	100	2		11	2	305.2	x-ray
YDDE	Uncharacterized isomerase YddE (EC 5.1.-.-) (ORFB)	P37757	3	100	295	99.3	2.12	191.9	6	2.08	141.6	x-ray
YDEJ	Inactive PncC family protein	Q8XB29	1	100	171	99.4	1.91		4	1.91	257.7	x-ray
YDFG	NADP-dependent 3-hydroxy acid dehydrogenase YdfG (L-allo-threonine dehydrogenase) (EC 1.1.1.381) (Malonic semialdehyde reductase) (EC 1.1.1.298)	P39831	2	100	180	72.6	2.3		8	2.5	178.3	x-ray
YDHF	Oxidoreductase YdhF	P76187	2	100	296	99.3	2.69		3	2.72	228.9	x-ray
YDHR	Putative monooxygenase YdhR	P0ACX3	2	100	96	95	2.45		4	2.45	231.8	x-ray
YDIB	Quinate/shikimate dehydrogenase (EC 1.1.1.282) (NAD-dependent shikimate 5-dehydrogenase)	P0A6D5	3	100	280	97.2	2.3	184.1	6	2.3	122.4	x-ray
YDIF	Acetate CoA-transferase YdiF	Q8X5X6	3	100	273	51.4	2.02	461	12	2.02	288	x-ray
YDIV	Putative anti-FlhC(2)FlhD(4) factor YdiV (c-di-GMP regulator CdgR)	P76204	2	100	181	76.4	2.41		6	2.57	159.5	x-ray
YDJH	Uncharacterized sugar kinase YdjH	P77493	2	100	307	97.5	1.98		3	2.03	298.5	x-ray
YEAR	Uncharacterized protein YeaR	P64488	1	100	103	86.6	2.3		4	2.3	162	x-ray
YECD	Isochorismatase family protein YecD (EC 3.-.-.-)	P0ADI7	1	100	185	98.4	1.3		4	1.3	417.4	x-ray
YEDK	Putative SOS response-associated peptidase YedK	P76318	6	75	221	99.5	1.57	177.1	9	1.59	161.4	x-ray
YEFM	Antitoxin YefM	P69346	1	100	55	66.3	2.05		4	2.05	118.7	x-ray
YEGS	Lipid kinase YegS	P76407	2	100	141	47.2	2.28		3	2.15	156.9	x-ray
YFBR	5'-deoxynucleotidase YfbR	P76491	3	100	95	47.7	2.1	292.4	6	2.1	140.6	x-ray
YFBU_X	UPF0304 protein YfbU	E2QPF5/Q1R9C1	2	100	164	100	2.25		11	2.25	243.3	x-ray
YFCD	Uncharacterized Nudix hydrolase YfcD	P65556	1	100	161	89.4	2		3	2	230	x-ray
YFCE	Phosphodiesterase YfcE	P67095	1	100	182	98.9	2.25		4	2.25	245.7	x-ray
YFCG	Disulfide-bond oxidoreductase YfcG	P77526	2	100	204	94.9	1.93		3	1.8	495	x-ray
YFDE	Acetyl-CoA:oxalate CoA-transferase (ACOCT) (EC 2.8.3.19) (Acetyl-coenzyme A transferase) (CoA:oxalate CoA-transferase)	P76518	1	100	374	98.2	2.12		6	2.12	269.6	x-ray
YFEX	Dye-decolorizing peroxidase YfeX	P76536	1	100	296	99	2.09		4	2.09	346	x-ray
YFHL	Ferredoxin YfhL	P52102	1	100	80	93	1.65		3	1.65	135.4	x-ray
YGAP	Inner membrane protein YgaP	P55734	5	100	103	59.2	1.62	449.7	5	1.62	449.7	x-ray
YGBF	CRISPR-associated endoribonuclease Cas2 (EC 3.1.-.-)	P45956	11	84.6	91	96.8	3.17	85.2	11	3.17	85.2	x-ray
YGBT	CRISPR-associated endonuclease Cas1 (EC 3.1.-.-)	Q46896	7	50	264	86.6	2.84	55.3	7	2.84	55.3	x-ray
YGDR	Uncharacterized lipoprotein YgdR	P65294	1	100	51	70.8	2.7		6	2.7	99	x-ray
YGEA	Uncharacterized protein YgeA of aspartate/glutamate/hydantoin racemase family	A0A140N890/(A0A0F6FBL7)	5	100	230	100	1.75	110.2	11	1.81	84.4	x-ray
YGEX	Diaminopropionate ammonia-lyase (DAPAL) (EC 4.3.1.15) (2,3-diaminopropionate ammonia-lyase) (Alpha,beta-diaminopropionate ammonia-lyase) (Diaminopropionatase)	P66899	4	80	260	65.3	2.29	271.9	4	2.29	271.9	x-ray
YGJK	Glucosidase YgjK (EC 3.2.1.-)	P42592	8	100	757	96.7	1.98	174.4	16	1.98	136.7	x-ray
YHDE	Maf-like protein YhdE	P25536/L3WSY9	2	100	186	94.4	2.33		4	2.33	134.2	x-ray
YHFG	Uncharacterized protein YhfG	P0ADX5	2	100	49	89.1	2.2		4	2.2	204.4	x-ray
YHHX	Uncharacterized oxidoreductase YhhX (EC 1.-.-.-)	P46853	1	100	344	99.7	2		6	2	197.1	x-ray
YICI	Alpha-xylosidase (EC 3.2.1.177)	P31434	5	100	772	100	2.17	316	9	2.14	291	x-ray
YIDC	Membrane protein insertase YidC	P25714/Q1R4M9	2	50	264	48.8	3		4	3	173.4	x-ray
YIHQ	Sulfoquinovosidase (SQase) (EC 3.2.1.199)	P32138	4	100	660	97.3	1.87	155.2	7	1.87	155.3	x-ray
YIHS	Sulfoquinovose isomerase (SQ isomerase) (EC 5.3.1.31)	P32140	1	100	372	90.1	2.5		6	2.5	396.5	x-ray
YIIM	Protein YiiM	P32157	3	100	144	64.3	2.57	255.6	6	2.57	178	x-ray
YJIA	Uncharacterized GTP-binding protein YjiA	P24203	3	100	317	99.7	2.21	268.5	5	2.25	197.8	x-ray
YJJX	Non-canonical purine NTP phosphatase (EC 3.6.1.-) (Inosine triphosphatase) (ITPase) (Non-standard purine NTP phosphatase) (Nucleoside-triphosphate phosphatase) (NTPase) (Xanthosine triphosphatase) (XTPase)	P39411	1	100	170	100	2.3		6	2.3	136	x-ray
YMDB	O-acetyl-ADP-ribose deacetylase (EC 3.5.1.-) (Regulator of RNase III activity)	P0A8D6	4	100	171	96.6	2.4	189.5	4	2.4	189.5	x-ray
YNAI	Low conductance mechanosensitive channel YnaI	P0AEB6	1	100	223		3.8		7	3.8	79431.1	em
YNCE	Uncharacterized protein YncE	P76116	2	100	321	90.9	2.3		8	2.3	225	x-ray
YNJE	Thiosulfate sulfurtransferase YnjE (EC 2.8.1.1)	P78067	4	100	407	93.6	2.04	325	6	2.16	247.3	x-ray
YOEB	Toxin YoeB (EC 3.1.-.-) (Putative endoribonuclease YoeB) (Putative mRNA interferase Yoeb)	P69348	4	100	84	100	2.31	85.8	10	2.38	59.6	x-ray
YOHF	Uncharacterized oxidoreductase YohF	P33368	1	100	186	73.5	1.36		8	1.36	286.7	x-ray
YPDF	Aminopeptidase YpdF	P76524	1	100	359	99.4	2.6		3	2.6	299.4	x-ray
YPEA	Acetyltransferase YpeA (EC 2.3.1.-)	P76539/P63422	3	100	138	97.9	1.74	296.3	14	1.87	145.7	x-ray
YPHB	Uncharacterized protein YphB	P76584	1	100	290	100	1.59		4	1.59	521	x-ray
YQGF	Putative pre-16S rRNA nuclease	P0A8I1	2	100	99	71.7	1.95		4	1.95	93.4	x-ray
YQHD	Alcohol dehydrogenase YqhD	Q46856	1	50	386	99.7	2		4	2	193.8	x-ray
YQJG	Glutathionyl-hydroquinone reductase YqjG (GS-HQR) (EC 1.8.-.-)	P42620	4	100	299	91.2	2.36	246.8	7	2.38	169.6	x-ray
YRDA	Protein YrdA	P0A9W9	2	100	174	94.6	1.86		6	1.56	256.6	x-ray
YTFE	Iron-sulfur cluster repair protein YtfE (Regulator of cell morphogenesis and NO signaling) (RCMNS)	P69506	3	100	218	99.1	1.97	303.9	4	1.98	225.5	x-ray
ZAPB	Cell division protein ZapB	P0AF36	1	100	79	97.5	2.8		4	2.8	2313	x-ray
ZAPC	Cell division protein ZapC	P75862	2	100	167	92.8	2.53		3	2.65	266.2	x-ray
ZAPD	Cell division protein ZapD	P36680	3	100	245	99.2	2.72	161.7	5	2.79	101.1	x-ray
ZINT	Metal-binding protein ZinT (Cadmium-induced protein ZinT)	P76344(U6NCE6)	9	100	185	85.6	1.91	115	11	1.86	116.7	x-ray
ZIPA	Cell division protein ZipA (FtsZ interacting protein A)	P77173	6	100	136	41.5	1.94	111	6	1.94	111	x-ray
ZNTB	Zinc transport protein ZntB	P64423	1	100	327	100	4.2		5	4.2	220.6	em
ZNTR	HTH-type transcriptional regulator ZntR (Zn(II)-responsive regulator of zntA)	P0ACS5	3	100	88	62.4	2.13	243.7	5	2.06	191.5	x-ray
ZNUA	High-affinity zinc uptake system protein ZnuA	P39172	6	100	170	54.8	1.98	143.9	12	1.98	113.1	x-ray
ZUR	Zinc uptake regulation protein (Zinc uptake regulator)	P0AC51	2	100	148	86.5	2.5		8	2.5	87.2	x-ray

## Sheet: ecoli_xray
Gene	Protein	UniProt	Entries	Entries(%)	Length	Length(%)	Resolution	Score	Chains	Resolution	xUMF
(A0A0H2UL03)	Thiol:disulfide interchange protein (DSBA)	A0A0H2UL03	4	100	187	98.9	1.58	199.1	8	1.58	148.9			: reference set
A6592_01350	Adhesin	Q1R2V7/Q8GA71	2	100	167	46.5	1.33		4	1.33	308		bold	: more than 1 chains per entry
AAC(6')-IB	Fluroquinolone acetylating aminoglycoside acetyltransferase	Q6SJ71	3	100	146	73.4	1.9	685.1	3	1.9	685.1
AAC(6')-IM	Aminoglycoside acetyltransferase	Q93ET8	2	100	176	98.9	1.83		3	1.78	248
AACC4	Aminoglycoside N(3)-acetyltransferase	Q306W4	3	100	257	99.6	2.59	329.4	12	2.66	138.9
AAT	Leucyl/phenylalanyl-tRNA--protein transferase (EC 2.3.2.6) (L/F-transferase) (Leucyltransferase) (Phenyalanyltransferase)	P0A8P1	9	100	123	52.6	2.49	158	9	2.49	158
AC067_20710	Subtilase cytotoxin subunit B-like protein	A0A0L7AAL2	1	100	115	81.6	2.35		5	2.35	132.6
AC067_20715	Pertussis toxin-like subunit ArtA	A0A0B1KWV6	2	100	171	71	2.08		5	1.91	146
AC43_2230	Type VI secretion protein IcmF	A0A0M3KL15/16/17	3	100	155	64.6	1.89	214.9	6	1.89	145.1
ACCB	Biotin carboxyl carrier protein of acetyl-CoA carboxylase	P0ABD8	2	100	77	49.4	2.15		5	2.35	127.2
ACCC	Biotin carboxylase (EC 6.3.4.14) (Acetyl-CoA carboxylase subunit A) (ACC) (EC 6.4.1.2)	P24182	19	73.1	444	98.9	2.08	144.7	24	2.12	143.6
ACEB	Malate synthase A (MSA) (EC 2.3.3.9)	P08997	3	100	524	98.3	1.37	440	4	1.38	398.1
ACEK	Isocitrate dehydrogenase kinase/phosphatase	Q8X607/A0A1Z3UWE5	4	80	415	71.8	2.89	187.5	6	2.82	157
ACPP	Acyl carrier protein (ACP) (Cytosolic-activating factor) (CAF) (Fatty acid synthase acyl carrier protein)	P0A6A8	16	94.1	71	91	2.19	49.5	16	2.19	49.5
ACPP_lpxd	Acyl carrier protein	(A0A0E2L7L4)	4	100	70	89.7	2.26	102.1	10	2.23	73.7
ACPP_45	Acyl carrier protein	B7MJ81	3	75	69	88.5	2.82	104.1	5	2.84	74.3
ACPS	Holo-[acyl-carrier-protein] synthase	P24224	2	50	125	99.2	2.04		5	2.04	123
ACRB	Multidrug efflux pump subunit AcrB (AcrAB-TolC multidrug efflux pump subunit AcrB) (Acridine resistance protein B)	P31224	23	37.1	1032	98.4	2.88	75	23	2.88	75
ACRR	HTH-type transcriptional regulator AcrR	P0ACS9	2	100	207	96.3	2.52		3	2.5	243.8
ACRZ	Multidrug efflux pump accessory protein AcrZ	P0AAW9/P0AAX1	3	100	36	73.5	3.4	312.1	5	3.32	129.2
ACU90_14705	Type VI secretion protein	A0A0N8J9U9	1	100	312	70.1	2.2		3	2.2	490.9
ACUI	Probable acrylyl-CoA reductase AcuI (EC 1.3.1.84) (Acryloyl-coenzyme A reductase AcuI)	P26646	2	100	311	96	2.43		5	2.53	233.8
ADHP	Alcohol dehydrogenase, propanol-preferring	P39451	1	100	336	100	2.01		4	2.01	565.6
ADIA	Biodegradative arginine decarboxylase (ADC) (EC 4.1.1.19)	P28629	1	100	755	100	2.4		10	2.4	431.5
ADIC	Arginine/agmatine antiporter	P60061/P60063	3	50	435	97.8	2.6	261.8	5	2.52	204
ADK	Adenylate kinase (AK) (EC 2.7.4.3) (ATP-AMP transphosphorylase) (ATP:AMP phosphotransferase) (Adenylate monophosphate kinase)	P69441	12	100	214	100	2.13	41.6	12	2.13	41.6
ADK_2	Adenylate kinase	A0A0J9X1X4/A7ZIN4/B7L799/K0BFA4	4	100	214	100	1.93	54.5	7	2.01	50.7
AES	Acetyl esterase (EC 3.1.1.-) (EcE)	P23872	2	100	313	98.1	2.05		9	2.13	170.2
AFAE3	Afimbrial adhesin AFA-III	Q57254	2	100	137	85.6	3.29		4	3.3	590.3
AGAS	Putative tagatose-6-phosphate ketose/aldose isomerase (EC 5.3.1.-)	P42907	1	100	359	93.5	1.8		6	1.8	484.4
AHPC	Alkyl hydroperoxide reductase subunit C (EC 1.11.1.15) (Alkyl hydroperoxide reductase protein C22) (Peroxiredoxin) (SCRP-23) (Sulfate starvation-induced protein 8) (SSI8) (Thioredoxin peroxidase)	P0AE08/A0A140NC97	5	100	164	87.7	3.26	169.2	15	3.26	137.5
AHPF	Alkyl hydroperoxide reductase subunit F (EC 1.8.1.-) (Alkyl hydroperoxide reductase F52A protein)	P35340	5	83.3	519	99.6	2.35	124.7	5	2.35	124.7
AIDB	Putative acyl-CoA dehydrogenase AidB (EC 1.3.99.-)	P33224	2	100	538	99.4	2.25		6	2.62	602.1
ALAS	Alanine--tRNA ligase (EC 6.1.1.7) (Alanyl-tRNA synthetase) (AlaRS)	P00957	8	100	440	50.2	2.13	223.5	8	2.13	223.5
ALDA	Lactaldehyde dehydrogenase (EC 1.2.1.22) (Aldehyde dehydrogenase A) (Glycolaldehyde dehydrogenase) (EC 1.2.1.21)	P25553	4	100	477	99.6	2.38	194.1	4	2.38	194.1
ALKA	DNA-3-methyladenine glycosylase 2 (EC 3.2.2.21) (3-methyladenine-DNA glycosylase II, inducible) (TAG II) (DNA-3-methyladenine glycosidase II) (DNA-3-methyladenine glycosylase II)	P04395	14	100	281	99.6	2.51	124.8	14	2.51	124.8
ALKB	Alpha-ketoglutarate-dependent dioxygenase AlkB (EC 1.14.11.33) (Alkylated DNA repair protein AlkB) (DNA oxidative demethylase AlkB)	P05050	33	97.1	198	91.7	1.78	109.7	33	1.78	109.7
ALLA	Ureidoglycolate lyase	P77731/P63486	2	100	108	67.5	1.66		4	1.66	255.3
ALLB	Allantoinase	P77671	1	100	290	64	2.1		4	2.1	486.1
ALLC	Allantoate amidohydrolase	P77425	2	66.7	409	99.5	2.23		4	2.23	89.5
ALLD	Ureidoglycolate dehydrogenase (NAD(+)) (EC 1.1.1.350)	P77555/(B1XGB5)	4	100	336	96.3	1.95	256.5	11	2.14	153.9
ALLR	HTH-type transcriptional repressor AllR	P0ACN4	1	100	172	63.5	1.8		4	1.8	244.9
ALR	Alanine racemase, biosynthetic (EC 5.1.1.1)	P0A6B4	8	100	357	99.4	2.53	463.7	8	2.53	463.7
ALSB	D-allose-binding periplasmic protein (ALBP)	P39265	3	100	288	92.6	2.2	89.5	4	2.08	73.4
ALSE	D-allulose-6-phosphate 3-epimerase (EC 5.1.3.-)	P32719	2	100	219	94.8	2.35		12	2.35	756.2
AMID	N-acetylmuramoyl-L-alanine amidase AmiD (EC 3.5.1.28)	P75820	4	100	254	92	2.14	158.9	4	2.14	158.9
AMN	AMP nucleosidase (EC 3.2.2.4)	P0AE12	4	100	269	55.6	2.78	311.3	8	2.78	293.4
AMPC	Beta-lactamase (EC 3.5.2.6) (Cephalosporinase)	P00811	95	93.1	357	94.7	1.82	180.9	95	1.82	180.9
AMPC_2	Beta-lactamase	B7SNP8/Q8XDQ2	2	100	357	94.7	1.68		4	1.68	350.6
AMTB	Ammonia channel (Ammonia transporter)	P69681	4	19	383	89.5	1.93	156.4	9	2.25	122.3
ANSA	L-asparaginase 1 (EC 3.5.1.1) (L-asparaginase I) (L-ASNase I) (L-asparagine amidohydrolase I)	P0A962	3	100	250	74	1.87	179.1	6	1.87	144.6
ANSB	L-asparaginase 2 (EC 3.5.1.1) (L-asparaginase II) (L-ASNase II) (L-asparagine amidohydrolase II) (Colaspase)	P00805	8	100	267	76.7	2.23	140.5	8	2.23	140.5
APBE	FAD:protein FMN transferase (EC 2.7.1.180) (Flavin transferase)	P0AB85	3	75	203	57.8	1.94	230.5	7	1.93	145.8
APH(2')-IB	Aminoglycoside phosphotransferase	Q93ET9/Q9EVD7	4	100	271	90.6	2.18	114.6	6	2.28	97
APHA	Class B acid phosphatase (CBAP) (EC 3.1.3.2)	P0AE22	11	100	209	88.2	1.74	208.8	11	1.74	208.8
APPA	Periplasmic AppA protein [Includes: Phosphoanhydride phosphohydrolase (EC 3.1.3.2) (pH 2.5 acid phosphatase) (AP); 4-phytase (EC 3.1.3.26)]	P07102	5	71.4	410	94.9	2.27	337.6	5	2.27	337.6
AQPZ	Aquaporin Z (Bacterial nodulin-like intrinsic protein)	P60844	9	100	227	98.3	2.52	164.6	9	2.52	164.6
ARAA	L-arabinose isomerase (EC 5.3.1.4)	P08202	3	100	498	99.6	2.57	523.4	6	2.57	310.1
ARAC	Arabinose operon regulatory protein	P0A9E0	4	100	149	51	2.08	120.2	7	1.97	98.9
ARAD	L-ribulose-5-phosphate 4-epimerase AraD (EC 5.1.3.4) (Phosphoribulose isomerase)	P08203	2	100	223	96.5	2.25		12	2.25	317
ARAF	L-arabinose-binding periplasmic protein (ABP)	P02924	10	100	299	90.9	1.79	153.3	10	1.79	153.3
ARCA	Aerobic respiration control protein ArcA	P0A9Q1	2	100	121	50.8	2.33		4	2.33	167.5
ARCB	Aerobic respiration control sensor protein ArcB	P0AEC3	3	100	117	15	2.1	295.2	3	2.1	295.2
ARGB	Acetylglutamate kinase (EC 2.7.2.8) (N-acetyl-L-glutamate 5-phosphotransferase) (NAG kinase) (NAGK)	P0A6C8/A0A140NEG9	7	100	258	100	1.87	110.5	8	1.88	108.8
ARGG	Argininosuccinate synthase (EC 6.3.4.5) (Citrulline--aspartate ligase)	P0A6E4	3	75	384	85.9	1.87	303.3	3	1.87	303.3
ARGI	Ornithine carbamoyltransferase subunit I (OTCase-1) (EC 2.1.3.3)	P04391	3	100	234	70.1	2.43	222.1	6	2.43	184.8
ARGR	Arginine repressor	P0A6D0	3	100	71	45.5	2.53	111.7	6	2.53	72.7
ARNA	Bifunctional polymyxin resistance protein ArnA (Polymyxin resistance protein PmrI) [Includes: UDP-4-amino-4-deoxy-L-arabinose formyltransferase (EC 2.1.2.13) (ArnAFT) (UDP-L-Ara4N formyltransferase); UDP-glucuronic acid oxidase, UDP-4-keto-hexauronic acid decarboxylating (EC 1.1.1.305) (ArnADH) (UDP-GlcUA decarboxylase) (UDP-glucuronic acid dehydrogenase)]	P77398	7	70	287	43.5	2.52	148.6	13	2.67	126.8
AROA	3-phosphoshikimate 1-carboxyvinyltransferase (EC 2.5.1.19) (5-enolpyruvylshikimate-3-phosphate synthase) (EPSP synthase) (EPSPS)	P0A6D3	18	100	427	100	1.69	122.4	18	1.69	122.4
AROE	Shikimate dehydrogenase (NADP(+)) (SD) (SDH) (EC 1.1.1.25)	P15770	1	100	269	98.9	1.5		4	1.5	172.9
AROF	Phospho-2-dehydro-3-deoxyheptonate aldolase, Tyr-sensitive	P00888	1	50	306	86	2		4	2	311.3
AROG	Phospho-2-dehydro-3-deoxyheptonate aldolase, Phe-sensitive (EC 2.5.1.54) (3-deoxy-D-arabino-heptulosonate 7-phosphate synthase) (DAHP synthase) (Phospho-2-keto-3-deoxyheptonate aldolase)	P0AB91	4	80	305	87.1	2.12	280.2	4	2.12	280.2
ARSC	Arsenate reductase	P08692	11	100	138	97.9	1.58	298.5	11	1.58	298.5
ARSD	Arsenical resistance operon trans-acting repressor ArsD	P46003	2	100	82	68.3	1.73		4	1.73	181
ASCG	HTH-type transcriptional regulator AscG (Cryptic asc operon repressor)	P24242	2	100	276	82.1	2.23		4	2.34	190.3
ASD	Aspartate-semialdehyde dehydrogenase (ASA dehydrogenase) (ASADH) (EC 1.2.1.11) (Aspartate-beta-semialdehyde dehydrogenase)	P0A9Q9	3	75	367	100	2.05	223.8	7	2.04	167.6
ASNA	Aspartate--ammonia ligase	P00963	2	100	327	99.1	2.35		4	2.35	193.7
ASPA	Aspartate ammonia-lyase	P0AC38	1	100	413	86.4	2.7		4	2.7	146.1
ASPC	Aspartate aminotransferase (AspAT) (EC 2.6.1.1) (Transaminase A)	P00509	78	90.7	396	100	2.23	92.4	78	2.23	92.4
ASPC_2	Aminotransferase	Q304P7/D3H0F7	6	100	395	99.7	2.13	195.3	6	2.13	195.3
ASPS	Aspartate--tRNA ligase (EC 6.1.1.12) (Aspartyl-tRNA synthetase) (AspRS)	P21889	3	100	585	99.2	2.57	157.2	5	2.6	91.9
ASST	Arylsulfate sulfotransferase AssT	Q8FDI4/A0A0D6H805	7	100	319	53.3	2.17	368	14	2.17	335.8
ASTB	N-succinylarginine dihydrolase (EC 3.5.3.23)	P76216	3	100	411	91.9	2.02	493.8	12	2.02	328.1
ASTC	Succinylornithine transaminase (SOAT) (EC 2.6.1.81) (Carbon starvation protein C) (Succinylornithine aminotransferase)	P77581	4	100	400	48.5	2.43	414.7	12	2.36	272.1
ATOA	Acetate CoA-transferase subunit beta	P76459	1	100	212	98.1	2.55		4	2.55	273.9
ATOB	Acetyl-CoA acetyltransferase (EC 2.3.1.9) (Acetoacetyl-CoA thiolase)	P76461	3	100	392	99.5	1.93	530.3	8	1.96	323
ATOD	Acetate CoA-transferase subunit alpha (EC 2.8.3.8) (Acetyl-CoA:acetoacetate-CoA transferase subunit alpha)	P76458	2	100	213	96.8	2.23		5	2.42	208.1
ATPA	ATP synthase subunit alpha (EC 3.6.3.14) (ATP synthase F1 sector subunit alpha) (F-ATPase subunit alpha)	P0ABB0	1	100	486	94.7	3.26		9	3.26	161.7
ATPC	ATP synthase epsilon chain (ATP synthase F1 sector epsilon subunit) (F-ATPase epsilon subunit)	P0A6E6	3	75	134	96.4	3.15	131.3	6	3.21	135.6
ATPD	ATP synthase subunit beta (EC 3.6.3.14) (ATP synthase F1 sector subunit beta) (F-ATPase subunit beta)	P0ABB4	1	100	458	99.6	3.26		6	3.26	86.1
ATPG	ATP synthase gamma chain	P0ABA6	2	100	130	45.3	2.68		5	3.03	774.4
AZOR	FMN-dependent NADH-azoreductase (EC 1.7.-.-) (Azo-dye reductase) (FMN-dependent NADH-azo compound oxidoreductase)	P41407	7	100	135	67.2	1.97	175.6	8	1.99	172.5
BAER	Transcriptional regulatory protein BaeR	P69229	1	100	117	48.8	3.3		12	3.3	302.1
BAMA	Outer membrane protein assembly factor BamA (Omp85)	P0A940	3	23.1	509	62.8	3.32	87.5	4	3.37	59.4
BAMB	Outer membrane protein assembly factor BamB	P77774	6	54.5	202	51.5	2.29	104.7	6	2.29	104.7
BAMD	Outer membrane protein assembly factor BamD	P0AC02	3	42.9	217	88.6	3.26	142	5	3.24	116.3
BAME	Outer membrane protein assembly factor BamE	P0A937	4	80	82	72.6	3.34	60	5	3.37	58.2
BCSZ	Endoglucanase (EC 3.2.1.4) (Carboxymethylcellulase) (CMCase) (Cellulase) (Endo-1,4-beta-glucanase)	P37651	2	100	337	91.6	2.03		8	2.03	312.5
BDCA	Cyclic-di-GMP-binding biofilm dispersal mediator protein	P39333	1	100	236	99.6	1.7		12	1.7	379.6
BEPA	Beta-barrel assembly-enhancing protease	P66948	1	50	287	58.9	2.6		5	2.6	214
BFR	Bacterioferritin (BFR) (EC 1.16.3.1) (Cytochrome b-1) (Cytochrome b-557)	P0ABD3	21	100	154	97.5	2.21	126.1	21	2.21	126.1
BGLA	6-phospho-beta-glucosidase BglA (EC 3.2.1.86) (Phospho-beta-glucosidase A)	Q46829	1	100	320	66.8	2.3		4	2.3	406.8
BIOA	Adenosylmethionine-8-amino-7-oxononanoate aminotransferase (EC 2.6.1.62) (7,8-diamino-pelargonic acid aminotransferase) (DAPA AT) (DAPA aminotransferase) (7,8-diaminononanoate synthase) (DANS) (Diaminopelargonic acid synthase)	P12995	9	81.8	428	99.8	2.02	204.3	9	2.02	204.3
BIOD1	ATP-dependent dethiobiotin synthetase BioD 1 (EC 6.3.3.3) (DTB synthetase 1) (DTBS 1) (Dethiobiotin synthase)	P13000	13	100	206	91.6	1.64	153.5	13	1.64	153.5
BIOF	8-amino-7-oxononanoate synthase (AONS) (EC 2.3.1.47) (7-keto-8-amino-pelargonic acid synthase) (7-KAP synthase) (KAPA synthase) (8-amino-7-ketopelargonate synthase)	P12998	4	100	383	99.7	1.88	211.6	4	1.88	211.6
BIRA	Bifunctional ligase/repressor BirA (Biotin operon repressor) (Biotin--[acetyl-CoA-carboxylase] ligase) (EC 6.3.4.15) (Biotin--protein ligase) (Biotin-[acetyl-CoA carboxylase] synthetase)	P06709	3	60	189	58.9	2.5	139.9	5	2.54	96.4
BLA	Beta-lactamase TEM	P62593	55	78.6	262	91.6	1.83	102	55	1.83	102
BLACTX-M-14	Beta-lactamase	Q9L5C7/A0A2S1PK93	10	100	259	89	1.44	185.2	10	1.44	185.2
BLACTX-M-9A	Beta-lactamase	Q9L5C8	28	100	259	89	1.42	219.6	28	1.42	219.6
BLANDM-1	Beta-lactamase	E5KIY2	7	87.5	228	84.4	1.95	206.3	14	1.95	174.3
BLAOXA-10	Beta-lactamase	Q7BNC2	2	100	186	69.9	1.78		6	1.83	210.8
BLATEM-63	Beta-lactamase	Q9AGJ5	3	100	263	92	1.5	260.1	3	1.5	260.1
BLA-TEM-94	Beta-lactamase	Q8KMX3	4	66.7	263	92	1.36	443.5	4	1.36	443.5
BLATEM-116	Beta-lactamase	Q79DR3	1	100	263	92	2.4		6	2.4	183.7
BLAUOE-1	Beta-lactamase	Q9EXV5	5	100	258	88.7	1.92	183.9	8	2.12	155.2
blaVIM-2	Metallo-beta-lactamase	Q5U7L7	1	100	194	72.9	2.19		4	2.19	281.4
BLC	Outer membrane lipoprotein Blc	P0A901	3	100	149	84.2	2.05	302.6	5	1.94	161.4
(BLT1)	Beta-lactamase Toho-1	Q47066	17	100	256	88	1.43	200.1	17	1.43	200.1
BTUB	Vitamin B12 transporter BtuB (Cobalamin receptor) (Outer membrane cobalamin translocator)	P06129	8	66.7	307	50	2.63	161.7	8	2.63	161.7
BTUC	Vitamin B12 import system permease protein BtuC	P06609	5	100	324	99.4	3.11	75.9	5	3.11	75.9
BTUD	Vitamin B12 import ATP-binding protein BtuD (EC 3.6.3.33) (Vitamin B12-transporting ATPase)	P06611	5	100	231	92.8	3.11	154.4	5	3.11	154.4
BTUF	Vitamin B12-binding protein	P37028	11	100	193	72.6	2.32	75.9	11	2.32	75.9
BWP17_00640	N-acetyltransferase	A0A1V3CQ74	3	60	166	94.9	2.8	126.6	3	2.8	126.6
C0022	Uncharacterized protein	A0A0H2V4H2	1	100	468	91.9	1.7		3	1.7	704.2
C1187	3-oxoacyl-[acyl-carrier protein] reductase	A0A0H2V833	2	100	242	99.6	2.3		6	2.3	644.8
C1411	Uncharacterized protein	A0A0H2V6G8	1	100	124	87.9	2.3		4	2.3	164.1
C1882	Uncharacterized protein	A0A0H2V7J1	1	100	93	98.9	3.4		4	3.4	248.6
C4014	Uncharacterized protein	A0A0H2VDX9	2	100	210	65.6	1.92		4	1.92	225.6
C4898	Uncharacterized protein	A0A0H2VD83	2	100	294	56.6	1.8		3	1.83	670.8
CADA	Inducible lysine decarboxylase	P0A9H3	2	100	711	99.4	3.05		10	3.05	279
CADC	Transcriptional activator CadC	P23890	4	80	318	62.1	2.05	191.8	4	2.05	191.8
CAIB	L-carnitine CoA-transferase (EC 2.8.3.21) (Crotonobetainyl-CoA:carnitine CoA-transferase)	P31572	7	100	400	98.8	2.04	186.1	7	2.04	186.1
CAIT	L-carnitine/gamma-butyrobetaine antiporter	P31553	2	100	492	97.6	3.33		4	3.41	406.3
CAN	Carbonic anhydrase 2 (EC 4.2.1.1) (Carbonate dehydratase 2)	P61517/A0A140NBR3	5	100	213	96.8	2.33	166.9	9	2.34	150.3
CARA	Carbamoyl-phosphate synthase small chain (EC 6.3.5.5) (Carbamoyl-phosphate synthetase glutamine chain)	P0A6F1	8	80	357	93.5	2.09	229.7	8	2.09	229.7
CARB	Carbamoyl-phosphate synthase large chain (EC 6.3.5.5) (Carbamoyl-phosphate synthetase ammonia chain)	P00968	10	100	715	66.6	2.05	300.9	10	2.05	300.9
CASA	CRISPR system Cascade subunit CasA (CRISPR type I-E/Ecoli-associated protein CasA/Cse1) (CRISPR-associated protein CasA/Cse1)	Q46901	3	50	319	63.5	3.15	162.9	4	3.17	130.4
CASB	CRISPR system Cascade subunit CasB	P76632	3	50	155	96.9	3.15	172.5	7	3.13	113
CASC	CRISPR system Cascade subunit CasC	Q46899	5	83.3	334	92	2.98	195.5	10	2.98	156.9
CASD	CRISPR system Cascade subunit CasD	Q46898	5	83.3	218	97.3	3.02	188.5	7	3.04	174.2
CASE	CRISPR system Cascade subunit CasE (EC 3.1.-.-) (CasE endoRNase) (crRNA endonuclease)	Q46897	3	42.9	164	82.4	2.81	165.8	5	2.98	115.8
CAT	Chloramphenicol acetyltransferase	P62577	5	100	213	97.3	2.68	131.2	9	2.68	116.2
CAT3	Chloramphenicol acetyltransferase	P00484	5	83.3	213	100	2.19	305.8	5	2.19	305.8
CBL	HTH-type transcriptional regulator cbl	Q47083	1	100	220	69.6	2.8		4	2.8	243.8
CCDA	Antitoxin CcdA	P62552/P62553	3	100	33	45.8	1.91	161.3	3	1.91	161.3
CCDB	Toxin CcdB	P62554	7	100	90	89.1	2.07	97.2	7	2.07	97.2
CDD	Cytidine deaminase (EC 3.5.4.5) (Cytidine aminohydrolase) (CDA)	P0ABF6	4	100	294	100	2.28	434	4	2.28	434
CEAC	Colicin-E3	P00646	2	33.3	468	84.9	2.66		4	2.66	187.3
CEST	Tir chaperone	P58233/P21244/Q47015	3	100	127	81.4	2.61	78.1	6	2.54	61.2
CFAB	CFA/I fimbrial subunit B	E3PPC4	5	100	134	78.8	2.2	54.5	5	2.2	54.5
CFAE	CFA/I fimbrial subunit E	P25734	3	100	338	93.9	2.4	219.4	5	2.42	183.1
CHEY	Chemotaxis protein CheY	P0AE67	55	98.2	124	96.1	2.05	54.1	55	2.05	54.1
CHEY_57	Chemotaxis protein CheY	P0AE68	3	100	128	99.2	1.98	845.8	6	1.98	505.9
CLCA	H(+)/Cl(-) exchange transporter ClcA (ClC-ec1)	P37019	39	97.5	430	90.9	3.14	120.1	39	3.14	120.1
CLPP	ATP-dependent Clp protease proteolytic subunit (EC 3.4.21.92) (Caseinolytic protease) (Endopeptidase Clp) (Heat shock protein F21.5) (Protease Ti)	P0A6G7	5	83.3	179	86.5	2.12	113.9	5	2.12	113.9
CLPS	ATP-dependent Clp protease adapter protein ClpS	P0A8Q6	14	100	81	76.4	2.29	93.9	14	2.29	93.9
CMA	Colicin-M	P05820	5	100	270	99.6	2.06	53.8	5	2.06	53.8
CMI	Colicin-M immunity protein	P18002	2	100	89	63.1	2.3		3	2.43	243.8
CMK	Cytidylate kinase (CK) (EC 2.7.4.25) (Cytidine monophosphate kinase) (CMP kinase) (Protein MssA) (p25)	P0A6I0	8	100	177	78	2.11	54.8	8	2.11	54.8
CMOA	Carboxy-S-adenosyl-L-methionine synthase	P76290/C3T5M2	2	100	225	91.1	1.62		4	1.62	343.3
CMOB	tRNA U34 carboxymethyltransferase	P76291/A1AC32	3	100	285	88.2	2.62	325	12	2.61	280.2
COAA	Pantothenate kinase (EC 2.7.1.33) (Pantothenic acid kinase) (Rts protein)	P0A6I3	3	100	286	90.5	2.43	100.4	5	2.5	96.4
COAD	Phosphopantetheine adenylyltransferase (EC 2.7.7.3) (Dephospho-CoA pyrophosphorylase) (Pantetheine-phosphate adenylyltransferase) (PPAT)	P0A6I6	25	100	157	98.7	1.9	117.5	25	1.9	117.5
COAE	Dephospho-CoA kinase (EC 2.7.1.24) (Dephosphocoenzyme A kinase)	P0A6I9	5	100	205	99.5	1.89	121.1	5	1.89	121.1
COBC	Adenosylcobalamin/alpha-ribazole phosphatase	P52086	1	100	201	99	2.55		3	2.55	374.4
CODA	Cytosine deaminase (CD) (CDA) (CDase) (EC 3.5.4.1) (Cytosine aminohydrolase) (Isoguanine deaminase) (EC 3.5.4.-)	P25524	12	100	422	98.8	1.59	288.9	12	1.59	288.9
COFA	Major pilin subunit	Q59393	2	100	180	75.6	1.08		3	1.14	217.7
COFB	CofB	Q93I73	3	100	332	63.5	2.47	387.9	5	2.89	235.4
COFJ	CofJ	Q93I65	2	66.7	276	79.3	2.18		9	1.85	264.6
COL	Colicin-E5	P18000	6	100	92	51.1	1.81	92.6	6	1.81	92.6
CORA	Magnesium transport protein CorA	P0ABI4	2	100	257	81.3	2.83		7	2.83	549.5
CPOB	Cell division coordinator CpoB	P45955	2	100	66	25.1	2.15		8	2.15	169.8
CPXA	Sensor histidine kinase CpxA (EC 2.7.13.3)	P0AE82	8	100	179	39.2	3.03	60.6	8	3.03	60.6
CPXP	Periplasmic protein CpxP	P0AE85	2	100	107	64.5	2.15		4	2.15	85.6
CPXR	Transcriptional regulatory protein CpxR	P0AE88	3	100	122	52.6	3.17	422.5	8	3.33	170.9
CRCB	Putative fluoride ion transporter CrcB	Q6J5N4/B7LI20	9	100	123	97.6	2.7	152.1	9	2.7	152.1
CRP	cAMP-activated global transcriptional regulator CRP (Catabolite activator protein) (CAP) (Catabolite gene activator) (cAMP receptor protein) (CRP) (cAMP regulatory protein)	P0ACJ8	37	97.4	197	93.8	2.41	47.1	37	2.41	47.1
CRP_X	CRP transcriptional dual regulator	C3SQJ7	2	100	201	95.7	2.2		6	2.19	54.4
CRR	PTS system glucose-specific EIIA component (EIIA-Glc) (EIII-Glc) (Glucose-specific phosphotransferase enzyme IIA component) (EC 2.7.1.199)	P69783	9	100	149	88.2	2.65	94.5	9	2.65	94.5
CSDA	Cysteine desulfurase CsdA (EC 2.8.1.7) (Cysteine sulfinate desulfinase) (CSD) (EC 4.4.1.-) (Selenocysteine lyase) (EC 4.4.1.16)	Q46925	5	83.3	398	99.3	2.05	253	9	2.03	219.5
CSDE	Sulfur acceptor protein CsdE	P0AGF2	3	75	133	90.5	2.27	120	4	2.3	84
CSGC	Curli assembly protein	B2CY50/(B5YVR5)	3	100	95	86.4	2	190.9	3	2	190.9
CSGG	Curli production assembly/transport component CsgG	P0AEA2	1	50	179	64.6	2.8		12	2.8	203.1
CSRA	Carbon storage regulator	P69913	1	100	54	88.5	2.29		4	2.29	162.6
CTX-M-14	Beta-lactamase	H6UQI0	8	100	260	91.5	1.03	278.5	15	1	240
CUEO	Blue copper oxidase CueO (Copper efflux oxidase)	P36649	33	84.6	348	67.4	1.65	195.3	33	1.65	195.3
CUER	HTH-type transcriptional regulator CueR (Copper efflux regulator) (Copper export regulator)	P0A9G4	5	100	111	82.2	2.34	85.4	5	2.34	85.4
CUSA	Cation efflux system protein CusA	P38054	10	90.9	522	49.9	3.7	79.4	10	3.7	79.4
CUSB	Cation efflux system protein CusB	P77239	11	100	296	72.7	3.59	60.3	11	3.59	60.3
CUSC	Cation efflux system protein CusC	P77211	4	100	327	71.6	2.4	83.5	5	2.43	71.5
CUSF	Cation efflux system protein CusF	P77214	5	100	75	68.2	1.51	106.7	5	1.51	106.7
CUSS	Sensor histidine kinase CusS	P77485	1	100	144	30	2.15		4	2.15	160.5
CUTA	Divalent-cation tolerance protein CutA (C-type cytochrome biogenesis protein CycY)	P69488	7	100	102	91.1	2.03	100.9	7	2.03	100.9
CYAY	Protein CyaY	P27838	3	100	106	100	1.54	298.3	3	1.54	298.3
CYBC	Soluble cytochrome b562	P0ABE7	49	30.8	106	100	2.41	34	49	2.41	34
CYNR	HTH-type transcriptional regulator CynR (Cyn operon transcriptional activator)	P27111	2	100	200	66.9	2.33		6	2.42	380.2
CYNS	Cyanate hydratase (Cyanase) (EC 4.2.1.104) (Cyanate hydrolase) (Cyanate lyase)	P00816	8	100	156	100	1.86	270.6	8	1.86	270.6
CYOA	Cytochrome bo(3) ubiquinol oxidase subunit 2 (Cytochrome b562-o complex subunit II) (Cytochrome o ubiquinol oxidase subunit 2) (Cytochrome o subunit 2) (Oxidase bo(3) subunit 2) (Ubiquinol oxidase chain B) (Ubiquinol oxidase polypeptide II) (Ubiquinol oxidase subunit 2)	P0ABJ1	3	100	158	50.2	2.77	113.7	4	2.95	113.3
CYSE	Serine acetyltransferase	P0A9D4	1	100	262	96	2.2		3	2.2	534.1
CYSI	Sulfite reductase [NADPH] hemoprotein beta-component (SiR-HP) (SiRHP) (EC 1.8.1.2)	P17846	17	89.5	359	63	1.92	266.8	17	1.92	266.8
CYSJ	Sulfite reductase [NADPH] flavoprotein alpha-component	P38038/W8SX42	3	100	374	62.4	2.29	296.9	4	2.22	234.9
CYSK	Cysteine synthase A	P0ABK6	2	100	312	96.6	2.73		4	2.73	413.3
CYSM	Cysteine synthase B (CSase B) (EC 2.5.1.47) (O-acetylserine (thiol)-lyase B) (OAS-TL B) (O-acetylserine sulfhydrylase B)	P16703	3	100	291	96	2.03	169.8	5	2.29	142.9
CYSS	Cysteine--tRNA ligase (EC 6.1.1.16) (Cysteinyl-tRNA synthetase) (CysRS)	P21888	3	100	228	49.5	2.4	286.9	3	2.4	286.9
DAAE	F1845 fimbrial protein	P13719	1	100	137	86.2	1.48		3	1.48	450.8
DACA	D-alanyl-D-alanine carboxypeptidase DacA (DD-carboxypeptidase) (DD-peptidase) (EC 3.4.16.4) (Beta-lactamase) (EC 3.5.2.6) (Penicillin-binding protein 5) (PBP-5)	P0AEB2/A0A0A0GRC5	8	61.5	352	87.3	1.84	227.4	8	1.84	227.4
DACB	D-alanyl-D-alanine carboxypeptidase DacB (DD-carboxypeptidase) (DD-peptidase) (EC 3.4.16.4) (D-alanyl-D-alanine endopeptidase) (DD-endopeptidase) (EC 3.4.21.-) (Penicillin-binding protein 4) (PBP-4)	P24228	6	100	422	88.5	1.64	404.5	6	1.64	404.5
DACC	D-alanyl-D-alanine carboxypeptidase DacC (DD-carboxypeptidase) (DD-peptidase) (EC 3.4.16.4) (Penicillin-binding protein 6) (PBP-6)	P08506	3	100	345	86.3	1.9	296.7	8	1.91	144.9
DAM	DNA adenine methylase (EC 2.1.1.72) (DNA adenine methyltransferase) (Deoxyadenosyl-methyltransferase) (M.EcoDam)	P0AEE8	17	100	185	66.5	2.42	73.3	17	2.42	73.3
DAPA	4-hydroxy-tetrahydrodipicolinate synthase (HTPA synthase) (EC 4.3.3.7)	P0A6L2/A0A066Q637/B7M7I1	21	100	292	100	2.1	235.8	24	2.12	222.4
DAPB	4-hydroxy-tetrahydrodipicolinate reductase (HTPA reductase) (EC 1.17.1.8)	P04036	5	100	270	98.9	2.28	101.5	5	2.28	101.5
DAPF	Diaminopimelate epimerase	P0A6K1/B7MH73/A7ZU14	6	100	274	100	2.23	100	8	2.18	99.2
DCD	dCTP deaminase (EC 3.5.4.13) (Deoxycytidine triphosphate deaminase)	P28248	6	100	174	90.2	2.31	145.5	6	2.31	145.5
DDLB	D-alanine--D-alanine ligase B (EC 6.3.2.4) (D-Ala-D-Ala ligase B) (D-alanylalanine synthetase B)	P07862	6	100	306	100	1.83	151.5	6	1.83	151.5
DEF	Peptide deformylase (PDF) (EC 3.5.1.88) (Polypeptide deformylase)	P0A6K3	22	95.7	161	95.3	2.13	119.1	22	2.13	119.1
DEGP	Periplasmic serine endoprotease DegP (EC 3.4.21.107) (Heat shock protein DegP) (Protease Do)	P0C0V0	5	62.5	367	77.4	3.26	132.1	5	3.26	132.1
DEGQ	Periplasmic pH-dependent serine endoprotease DegQ	P39099	1	50	276	60.7	2.6		12	2.6	368
DEGS	Serine endoprotease DegS (EC 3.4.21.107) (Site-1 protease DegS) (S1P protease DegS) (Site-1-type intramembrane protease)	P0AEE3	14	50	179	50.4	2.51	88.7	14	2.51	88.7
DEOA	Thymidine phosphorylase (EC 2.4.2.4) (TdRPase)	P07650	7	100	439	99.8	2.25	122.7	7	2.25	122.7
DEOC	Deoxyribose-phosphate aldolase (DERA) (EC 4.1.2.4) (2-deoxy-D-ribose 5-phosphate aldolase) (Phosphodeoxyriboaldolase) (Deoxyriboaldolase)	P0A6L0	7	100	248	95.8	1.2	301.1	11	1.18	278.6
DEOC_2	deoxyribose phosphate aldolase	no id	4	44.4	246	95	1.89	197.3	5	1.87	190.8
DEOD	Purine nucleoside phosphorylase DeoD-type (PNP) (EC 2.4.2.1) (Inosine phosphorylase)	P0ABP8	20	100	237	99.2	2.21	126.5	20	2.21	126.5
DEOD_57	Purine nucleoside phosphorylase DeoD-type	P0ABP9	10	100	212	88.7	2.25	138	10	2.25	138
DEOD_24	Purine nucleoside phosphorylase DeoD-type	A7ZVS7/(H0QGF5)	2	100	237	99.2	1.66		9	1.43	238.8
DGCZ	Diguanylate cyclase YdeH (DGC) (EC 2.7.7.65)	P31129	2	66.7	170	57.4	2.85		3	3.2	465.4
DGKA	Diacylglycerol kinase (DAGK) (EC 2.7.1.107) (Diglyceride kinase) (DGK)	P0ABN1	17	94.4	113	92.6	2.84	77.1	17	2.84	77.1
DGOA	2-dehydro-3-deoxy-6-phosphogalactonate aldolase (EC 4.1.2.21) (2-oxo-3-deoxygalactonate 6-phosphate aldolase) (6-phospho-2-dehydro-3-deoxygalactonate aldolase) (6-phospho-2-keto-3-deoxygalactonate aldolase) (KDPGal)	Q6BF16	3	100	199	97.1	3.86	298.8	4	4.67	315.3
DGT	Deoxyguanosinetriphosphate triphosphohydrolase (dGTP triphosphohydrolase) (dGTPase) (EC 3.1.5.1)	P15723	4	57.1	502	99.4	3.15	201.8	11	3.27	152
DHAK	PEP-dependent dihydroxyacetone kinase, dihydroxyacetone-binding subunit DhaK (EC 2.7.1.121)	P76015	4	36.4	354	99.4	2.62	222	7	2.68	184.8
DHAL	PEP-dependent dihydroxyacetone kinase, ADP-binding subunit DhaL (EC 2.7.1.121)	P76014	3	100	203	96.7	2.37	229	5	2.35	196.1
DHAR	PTS-dependent dihydroxyacetone kinase operon regulatory protein	P76016	3	100	294	46	2.8	173.3	6	2.8	111.7
(DHFR)	Dihydrofolate reductase	(U6N356/B1XC49)	8	72.7	159	100	1.14	171.4	10	1.2	133.3
DIAA	DnaA initiator-associating protein DiaA	P66817	2	100	191	97.4	1.88		3	1.87	390.5
DINB	DNA polymerase IV (Pol IV) (EC 2.7.7.7)	Q47155	14	48.3	340	96.9	2.26	149.8	19	2.31	149.8
DINJ	Antitoxin DinJ	Q47150	2	100	83	95.5	1.95		15	1.94	257.7
DKSA	RNA polymerase-binding transcription factor DksA (DnaK suppressor protein)	P0ABS1	3	100	140	92.7	3.6	77.7	5	3.46	61.3
DLGD	2,3-diketo-L-gulonate reductase (2,3-DKG reductase) (EC 1.1.1.130) (3-dehydro-L-gulonate 2-dehydrogenase)	P37672	2	100	332	100	2		8	2.1	147.2
DMSD	Tat proofreading chaperone DmsD (DMSO reductase maturation protein) (Twin-arginine leader-binding protein DmsD)	P69853	3	100	203	99.5	2.3	288.9	12	2.39	155.8
DNAE	DNA polymerase III subunit alpha (EC 2.7.7.7)	P10443	5	100	268	23.1	2.33	162.4	5	2.33	162.4
DNAG	DNA primase	P0ABS5	2	25	304	52.3	2.63		6	2.81	161.6
DNAK	Chaperone protein DnaK (HSP70) (Heat shock 70 kDa protein) (Heat shock protein 70)	P0A6Y8	4	10	424	66.5	2.48	246.8	6	2.36	233.8
DNAN	DNA polymerase III subunit beta (EC 2.7.7.7) (Beta sliding clamp) (Beta clamp)	P0A988	33	89.2	338	92.3	1.96	86.8	33	1.96	86.8
DNAN_2	Beta sliding clamp	P0A990/Q1R4N6	3	100	323	88.3	2.46	223.1	7	2.67	164.6
(DNAN)	dna polymerase 3 subunit beta	(U6NCW5)	6	100	338	92.3	1.99	152.9	11	2	136.3
DNAQ	DNA polymerase III subunit epsilon (EC 2.7.7.7)	P03007	4	66.7	174	71.6	1.8	161.9	4	1.8	161.9
DNAT	Primosomal protein 1 (Primosomal protein I)	P0A8J2	2	100	71	39.7	2.4		8	2.4	144.3
DNAX	DNA polymerase III subunit tau (EC 2.7.7.7) (DNA polymerase III subunit gamma)	P06710	6	66.7	365	56.8	3.4	69.1	6	3.4	69.1
DNDE	DNA sulfur modification protein DndE	I2SR85	1	100	104	88.9	2.5		9	2.5	106.3
DOSC	Diguanylate cyclase DosC	P0AA89	4	50	161	35	1.96	141.1	6	2.23	117.4
DPPA	Periplasmic dipeptide transport protein (Dipeptide-binding protein) (DBP)	P23847	2	100	507	94.8	2.6		5	2.96	560
DPS	DNA protection during starvation protein (EC 1.16.-.-)	P0ABT2	9	81.8	155	92.8	2.55	179.1	18	2.55	174.5
DPS_57	DNA protection during starvation protein	P0ABT3	1	100	155	92.8	1.5		6	1.5	525.2
DRAA	Dr hemagglutinin structural subunit	P24093	6	100	137	85.6	1.93	215.5	12	1.93	187.1
DS966_25385	Uncharacterized protein	A0A192ETU5	2	100	105	99.1	2.83		3	2.98	1920.4
DSBA	Thiol:disulfide interchange protein DsbA	P0AEG4	20	95.2	185	88.9	2.42	62.8	20	2.42	62.8
DSBB	Disulfide bond formation protein B	P0A6M2	3	75	113	64.2	3.7	88.6	4	3.7	91.8
DSBC	Thiol:disulfide interchange protein DsbC	P0AEG6	5	100	215	91.1	2.24	106.4	5	2.24	106.4
DSBE	Thiol:disulfide interchange protein DsbE (Cytochrome c biogenesis protein CcmG)	P0AA86	5	100	126	68.1	2.05	87.6	5	2.05	87.6
DSBG	Thiol:disulfide interchange protein DsbG	P77202	7	87.5	228	91.9	1.98	202.6	14	1.98	123.1
DTD	D-aminoacyl-tRNA deacylase	P0A6M4	1	100	145	100	1.55		4	1.55	194.6
DUSC	tRNA-dihydrouridine(16) synthase (EC 1.3.1.-) (U16-specific dihydrouridine synthase) (U16-specific Dus) (tRNA-dihydrouridine synthase C)	P33371	4	80	205	65.1	2.23	174.9	7	2.11	160.2
DUT	Deoxyuridine 5'-triphosphate nucleotidohydrolase (dUTPase) (EC 3.6.1.23) (dUTP pyrophosphatase)	P06968	10	100	135	89.4	1.73	133.2	10	1.73	133.2
DXR	1-deoxy-D-xylulose 5-phosphate reductoisomerase (DXP reductoisomerase) (EC 1.1.1.267) (1-deoxyxylulose-5-phosphate reductoisomerase) (2-C-methyl-D-erythritol 4-phosphate synthase)	P45568	12	80	396	99.5	2.25	90.9	12	2.25	90.9
(E2BB)	Heat-labile enterotoxin IIB, B chain	P43529	7	100	98	80.3	1.82	132.2	7	1.82	132.2
ECBD_0964	6-carboxy-5,6,7,8-tetrahydropterin synthase	A0A140N8U9	2	100	117	96.7	2.42		6	2.42	202.7
ECBD_2329	Enoyl-[acyl-carrier-protein] reductase [NADH]	A0A140NA83	3	100	191	72.9	1.92	591.5	6	1.92	317.4
ECDB	Probable UbiX-like flavin prenyltransferase	P69772	1	100	176	89.3	2		4	2	375.6
ECO	Ecotin	P23827	10	52.6	137	84.6	2.54	74.6	10	2.54	74.6
ECO29KIR	Eco29kIR	Q46944	3	100	208	97.2	2.53	156.7	13	2.65	97
ECOO109IR	EcoO109IR	Q9RPJ3	2	100	177	65.1	2.15		3	2.07	148
ECORIR	Type-2 restriction enzyme EcoRI	P00642	7	87.5	261	94.2	2.24	169.7	7	2.24	169.7
ECORVR	Type-2 restriction enzyme EcoRV	P04390	15	46.9	222	90.6	2.13	91.7	15	2.13	91.7
ECPA	Common pilus major fimbrillin subunit EcpA	Q8CWB9	2	100	155	79.5	1.94		8	2.02	129.7
ECP_4654	FimG protein	A0A140UH97	3	100	13	92.9	2.07	497.3	5	2.01	373.4
ECP_4655	FimH protein	A0A0R4I961/A0A454AB91	5	83.3	279	100	2.28	144.1	8	2.24	124.4
ECS1560	Putative secreted effector protein	A0A0H3JDV8	3	100	571	73	2.63	160.3	8	2.5	101.8
ECS4384	Heme utilization carrier protein	Q8X5N5	1	100	156	95.1	2.05		3	2.05	198.7
ECS5070	Uncharacterized protein	Q8X5Q7	2	100	203	89.4	1.75		4	1.75	481.9
ECXB	Cholera enterotoxin subunit B	Q8GAV3	2	100	103	82.4	1.83		10	1.83	257.9
EDA	KHG/KDPG aldolase [Includes: 4-hydroxy-2-oxoglutarate aldolase (EC 4.1.3.16) (2-keto-4-hydroxyglutarate aldolase) (KHG-aldolase); 2-dehydro-3-deoxy-phosphogluconate aldolase (EC 4.1.2.14) (2-keto-3-deoxy-6-phosphogluconate aldolase) (KDPG-aldolase) (Phospho-2-dehydro-3-deoxygluconate aldolase) (Phospho-2-keto-3-deoxygluconate aldolase)]	P0A955/A0A140NB38	7	100	213	100	2.09	174.9	7	2.09	174.9
EFEB	Deferrochelatase/peroxidase EfeB (EC 1.11.1.-)	P31545/Q8XAS4	3	75	375	88.7	2.32	318.2	8	2.23	187.1
EFP	Elongation factor P	P0A6N4	1	100	134	71.3	2.5		3	2.5	198.8
ELBB	Glyoxalase ElbB (EC 4.2.1.-) (Sigma cross-reacting protein 27A) (SCRP-27A)	P0ABU5	2	100	216	99.5	2.3		6	2.52	435.3
ELTA	Heat-labile enterotoxin A chain	P06717	7	87.5	185	71.7	2.24	162.1	7	2.24	162.1
ELTB	Heat-labile enterotoxin B chain	P32890	20	90.9	103	83.1	2.02	143	20	2.02	143
EMRE	Multidrug transporter EmrE (Efflux-multidrug resistance protein EmrE) (Ethidium resistance protein) (Methyl viologen resistance protein C)	P23895	3	100	95	86.4	4.23	28.8	7	4.27	14.7
EMTA	Endo-type membrane-bound lytic murein transglycosylase A (EC 4.2.2.n2) (Peptidoglycan lytic endotransglycosylase)	P0C960	5	100	183	90.1	2.17	141.2	5	2.17	141.2
ENO	Enolase (EC 4.2.1.11) (2-phospho-D-glycerate hydro-lyase) (2-phosphoglycerate dehydratase)	P0A6P9	4	100	430	99.5	2	204.2	4	2	204.2
ENTC	Isochorismate synthase EntC (EC 5.4.4.2) (Isochorismate mutase)	P0AEJ2/P0AEJ3	3	60	375	95.9	2.24	417.1	5	2.26	273.1
ENTE	Enterobactin synthase component E	P10378/A0A0E1LUI6	3	75	513	95.7	2.7	512.9	8	2.8	325
ENTF	Enterobactin synthase component F	P11454	3	75	625	48.3	2.93	284.7	3	2.93	284.7
ENTH	Proofreading thioesterase EntH (EC 3.1.2.-) (Enterobactin synthase component H) (p15)	P0A8Y8	3	100	136	99.3	2.06	182.5	6	2.06	123.4
ENVC	Murein hydrolase activator EnvC	P37690	1	100	130	31	1.57		4	1.57	345.6
EPD	D-erythrose-4-phosphate dehydrogenase (E4PDH) (EC 1.2.1.72)	P0A9B6	3	100	183	54	2.54	236.1	9	2.54	128.3
EPMA	Elongation factor P--(R)-beta-lysine ligase	P0A8N7	1	50	259	79.7	2.5		4	2.5	249.4
EPTC	Phosphoethanolamine transferase EptC	P0CB39	3	100	357	61.9	2.27	656.3	3	2.27	656.3
ERA	GTPase Era	P06616	2	100	292	97	2.6		4	2.6	196.2
ESCU	Type III secretion system LEE export apparatus switch protein EscU	Q9AJ26	5	41.7	94	27.2	1.61	124.7	5	1.61	124.7
ESPG	EspG protein	Q5WMC0	1	100	267	67.1	2.15		11	2.15	129.3
ESPG(ECS4590)	T3SS secreted effector EspG	Q7DB50	5	100	349	91.6	3.06	116.6	5	3.06	116.6
EUTB	Ethanolamine ammonia-lyase heavy chain (EC 4.3.1.7) (Ethanolamine ammonia-lyase large subunit)	P0AEJ6	8	100	453	100	2.11	369.4	16	2.11	319.4
EUTC	Ethanolamine ammonia-lyase light chain (EC 4.3.1.7) (Ethanolamine ammonia-lyase small subunit)	P19636	8	100	252	85.4	2.11	211.9	13	2.12	175.2
EUTL	Ethanolamine utilization protein EutL	P76541	2	50	214	97.7	2.26		3	2.24	268.3
EUTM	Ethanolamine utilization protein EutM	P0ABF4	3	100	89	91.8	2.27	177.7	7	2.34	99
EUTN	Ethanolamine utilization protein EutN	P0AEJ8/P0AEJ9	2	100	95	100	2.56		8	2.56	93.6
EUTS	Ethanolamine utilization protein EutS	P63746	2	100	106	95.5	2.08		9	2.22	143.3
EXBB	Biopolymer transport protein ExbB	P0ABU7	3	100	221	90.6	2.98	238.5	8	2.03	134.3
EXOX	Exodeoxyribonuclease 10 (EC 3.1.11.-) (Exodeoxyribonuclease X) (Exo X) (Exonuclease X)	P0AEK0	3	100	166	75.5	2.53	302.4	6	2.53	148.6
F17AG	F17a-G fimbrial adhesin	Q99003	7	100	100	29.1	1.71	247.2	8	1.71	252.3
F17BG	F17b-G fimbrial adhesin	Q47200	4	100	175	51	2.15	222.9	4	2.15	222.9
FABA	3-hydroxydecanoyl-[acyl-carrier-protein] dehydratase (EC 4.2.1.59) (3-hydroxyacyl-[acyl-carrier-protein] dehydratase FabA) (Beta-hydroxydecanoyl thioester dehydrase) (Trans-2-decenoyl-[acyl-carrier-protein] isomerase) (EC 5.3.3.14)	P0A6Q3	3	100	164	95.3	1.97	339.4	6	1.97	216.2
FABB	3-oxoacyl-[acyl-carrier-protein] synthase 1 (EC 2.3.1.41) (3-oxoacyl-[acyl-carrier-protein] synthase I) (Beta-ketoacyl-ACP synthase I) (KAS I)	P0A953	23	95.8	403	99.3	2.2	187.4	23	2.2	187.4
FABD	Malonyl CoA-acyl carrier protein transacylase (MCT) (EC 2.3.1.39)	P0AAI9	5	100	305	98.7	2.04	188.2	5	2.04	188.2
FABF	3-oxoacyl-[acyl-carrier-protein] synthase 2 (EC 2.3.1.179) (3-oxoacyl-[acyl-carrier-protein] synthase II) (Beta-ketoacyl-ACP synthase II) (KAS II)	P0AAI5	12	100	411	99.5	2.36	198.5	12	2.36	198.5
FABG	3-oxoacyl-[acyl-carrier-protein] reductase FabG (EC 1.1.1.100) (3-ketoacyl-acyl carrier protein reductase) (Beta-Ketoacyl-acyl carrier protein reductase) (Beta-ketoacyl-ACP reductase)	P0AEK2	2	66.7	243	99.6	2.28		5	2.23	412.6
FABH	3-oxoacyl-[acyl-carrier-protein] synthase 3 (EC 2.3.1.180) (3-oxoacyl-[acyl-carrier-protein] synthase III) (Beta-ketoacyl-ACP synthase III) (KAS III) (EcFabH)	P0A6R0/P0A6R2	12	85.7	317	100	1.88	193.4	12	1.88	193.4
FABI	Enoyl-[acyl-carrier-protein] reductase [NADH] FabI (ENR) (EC 1.3.1.9) (NADH-dependent enoyl-ACP reductase)	P0AEK4	14	66.7	256	97.7	2.38	117.1	14	2.38	117.1
FABZ	3-hydroxyacyl-[acyl-carrier-protein] dehydratase FabZ	B7MBG1	1	100	143	94.7	2.5		6	2.5	194.6
FADL	Long-chain fatty acid transport protein (Outer membrane FadL protein) (Outer membrane flp protein)	P10384	8	57.1	421	94.4	2.83	136.3	8	2.83	136.3
FADM	Long-chain acyl-CoA thioesterase FadM	P77712	1	100	132	100	1.9		4	1.9	277.5
FADR	Fatty acid metabolism regulator protein	P0A8V6	5	100	221	92.5	2.42	93.7	5	2.42	93.7
FAEE	Chaperone protein FaeE	P25401	4	80	204	79.1	2.27	121.8	7	2.35	89
FAEG	K88 fimbrial protein AD	P14191	5	83.3	180	63.2	2.11	173.7	5	2.11	173.7
FAEG_2	K88 fimbrial protein AC	P14190	3	100	159	56.2	1.78	442.8	4	1.81	331
FBAA	Fructose-bisphosphate aldolase class 2 (FBP aldolase) (FBPA) (EC 4.1.2.13) (Fructose-1,6-bisphosphate aldolase) (Fructose-bisphosphate aldolase class II)	P0AB71	9	90	175	48.7	1.98	194.1	9	1.98	194.1
FBP	Fructose-1,6-bisphosphatase class 1 (FBPase class 1) (EC 3.1.3.11) (D-fructose-1,6-bisphosphate 1-phosphohydrolase class 1)	P0A993	5	100	265	79.8	2.01	215.7	5	2.01	215.7
FCL	GDP-L-fucose synthase (EC 1.1.1.271) (GDP-4-keto-6-deoxy-D-mannose-3,5-epimerase-4-reductase)	P32055	8	100	314	97.8	1.88	218.2	8	1.88	218.2
FDHF	Formate dehydrogenase H (EC 1.1.99.33) (EC 1.2.1.2) (Formate dehydrogenase-H subunit alpha) (FDH-H) (Formate-hydrogen-lyase-linked, selenocysteine-containing polypeptide)	P07658	4	100	657	91.9	2.57	220.6	4	2.57	220.6
FDX	2Fe-2S ferredoxin	P0A9R4	1	100	108	97.3	1.7		3	1.7	321
FECA	Fe(3+) dicitrate transport protein FecA (Iron(III) dicitrate transport protein FecA)	P13036	5	100	647	83.6	2.51	158.6	5	2.51	158.6
FEDF	F18 fimbrial adhesin AC	Q47212	6	85.7	142	47.3	1.81	133.7	6	1.81	133.7
FEOB	Fe(2+) transporter FeoB (Ferrous iron transport protein B)	P33650/J7QA66	5	55.6	259	33.5	2.6	123.4	10	2.57	97.1
FEPB	Ferrienterobactin-binding periplasmic protein	P0AEL6	1	100	291	91.5	1.85		3	1.85	510.9
FFH	Signal recognition particle protein	P0AGD7	2	12.5	290	64	3.27		4	3.27	142.8
FHUA	Ferrichrome outer membrane transporter/phage receptor	P06971	11	100	383	51.3	2.75	149.4	12	2.8	147.9
FHUD	Iron(3+)-hydroxamate-binding protein FhuD (Ferric hydroxamate uptake protein D) (Ferrichrome-binding periplasmic protein) (Iron(III)-hydroxamate-binding protein FhuD)	P07822	4	100	260	87.8	2.12	286.7	4	2.12	286.7
FIC	Probable adenosine monophosphate-protein transferase fic	P20605	2	100	107	53.5	2.2		5	2.24	153.3
FIEF	Ferrous-iron efflux pump FieF	P69380	2	100	283	94.3	3.35		6	3.2	72.2
FIMC	Chaperone protein FimC	P31697	5	50	177	73.4	2.65	117.4	8	2.73	123.2
FIMD	Outer membrane usher protein FimD	P30130	2	40	331	37.7	3.3		3	3.13	202.5
FIMF	Protein FimF	P08189	3	33.3	115	65.3	2.75	152.5	6	2	84
FIMG	Protein FimG	P08190	7	70	132	79	1.92	111.6	7	1.92	111.6
FIMH	Type 1 fimbrin D-mannose specific adhesin (Protein FimH)	P08191	9	15.8	279	93	2.56	34.1	9	2.56	34.1
FIMH_UT	Type 1 fimbiral adhesin FimH	Q1R2J4	2	50	264	88	2.28		5	2.09	87.4
FIMH_X	FimH	A2IC68/Q9S497	4	100	158	69.6	2.34	168.6	9	2.57	127.1
FIS	DNA-binding protein Fis (Factor-for-inversion stimulation protein) (Hin recombinational enhancer-binding protein)	P0A6R3	18	58.1	89	90.8	2.91	108.4	18	2.91	108.4
FIS_D1	DNA-binding protein Fis (Factor-for-inversion stimulation protein) (Hin recombinational enhancer-binding protein)	(C9QXL3)	4	100	89	90.8	2.78	319	8	2.78	168.4
FIU	Catecholate siderophore receptor Fiu	P75780	2	66.7	711	93.6	2.7		6	2.77	252.1
FKPA	FKBP-type peptidyl-prolyl cis-trans isomerase FkpA (PPIase) (EC 5.2.1.8) (Rotamase)	P45523	3	75	210	77.8	2.22	210.9	5	2.18	104
FLDA	Flavodoxin 1	P61949	2	100	169	96	2.2		3	2.07	273.1
FLHD	Flagellar transcriptional regulator FlhD	P0A8S9	3	100	79	68.1	2.57	98.2	6	2.57	75.7
FLID	Flagellar hook-associated protein 2	P24216	1	50	242	51.7	3		5	3	533.3
FMT	Methionyl-tRNA formyltransferase (EC 2.1.2.9)	P23882	2	100	269	85.4	2.4		4	2.4	151.3
FOCA	Probable formate transporter 1	P0AC25	2	100	247	86.7	2.72		13	2.9	113
FOLA	Dihydrofolate reductase (EC 1.5.1.3)	P0ABQ4	78	87.6	159	100	1.97	79.6	78	1.97	79.6
FOLA_6	Dihydrofolate reductase	P0ABQ5/C3TR70	4	100	159	100	1.56	174.1	4	1.56	174.1
FOLD	Bifunctional protein FolD [Includes: Methylenetetrahydrofolate dehydrogenase (EC 1.5.1.5); Methenyltetrahydrofolate cyclohydrolase (EC 3.5.4.9)]	P24186	4	100	284	98.6	2.11	153.3	6	2.04	128.9
FOLE	GTP cyclohydrolase 1 (EC 3.5.4.16) (GTP cyclohydrolase I) (GTP-CH-I)	P0A6T5	7	100	221	99.5	2.76	119.9	7	2.76	119.9
FOLK	2-amino-4-hydroxy-6-hydroxymethyldihydropteridine pyrophosphokinase (EC 2.7.6.3) (6-hydroxymethyl-7,8-dihydropterin pyrophosphokinase) (PPPK) (7,8-dihydro-6-hydroxymethylpterin-pyrophosphokinase) (HPPK)	P26281	45	84.9	158	99.4	1.44	73.2	45	1.44	73.2
FOLP	Dihydropteroate synthase (DHPS) (EC 2.5.1.15) (Dihydropteroate pyrophosphorylase)	P0AC13	3	100	282	100	2	347.6	3	2	347.6
FOLP_6	Dihydropteroate synthase	P0AC14	10	90.9	242	85.8	2.05	273.9	10	2.05	273.9
FOLX	Dihydroneopterin triphosphate 2'-epimerase (EC 5.1.99.-) (D-erythro-7,8-dihydroneopterin triphosphate epimerase)	P0AC19	1	100	119	99.2	2.9		8	2.9	285
FOSA3	Glutathione transferase FosA	D7UQM0	1	100	94	68.1	2.69		8	2.69	205.4
FOX-4	Beta-lactamase	Q9L387	7	100	355	92.9	1.44	229.4	9	1.4	226.6
FPR	Flavodoxin/ferredoxin--NADP reductase	P28861	2	100	162	65.3	1.8		3	1.83	516.6
FRC	Formyl-CoA:oxalate CoA-transferase (FCOCT) (EC 2.8.3.16) (Formyl-coenzyme A transferase) (Formyl-CoA transferase)	P69902	4	66.7	415	99.8	2	311.5	7	2	292.5
FRDA	Fumarate reductase flavoprotein subunit (EC 1.3.5.4)	P00363	10	76.9	577	95.8	3.24	161	10	3.24	161
FRDB	Fumarate reductase iron-sulfur subunit (EC 1.3.5.1)	P0AC47/P0AC49	11	100	243	99.6	3.27	144.3	11	3.27	144.3
FRDC	Fumarate reductase subunit C (Fumarate reductase 15 kDa hydrophobic protein)	P0A8Q0/B7MKV9	12	100	130	99.2	3.28	130.8	12	3.28	130.8
FRDD	Fumarate reductase subunit D (Fumarate reductase 13 kDa hydrophobic protein)	P0A8Q3	11	100	119	100	3.27	110.1	11	3.27	110.1
FRE	NAD(P)H-flavin reductase	P0AEN1	1	100	161	69.1	2.2		4	2.2	170.9
FRMR	Transcriptional repressor FrmR	Q8X5J3	1	100	83	91.2	2.7		4	2.7	109.5
FRR	Ribosome-recycling factor (RRF) (Ribosome-releasing factor)	P0A805	5	83.3	182	98.4	2.76	47.3	5	2.76	47.3
FSAA	Fructose-6-phosphate aldolase 1 (EC 4.1.2.-) (Fructose-6-phosphate aldolase A) (FSAA)	P78055	6	100	219	99.5	2.11	199.1	12	2.11	178.4
FTNA	Bacterial non-heme ferritin (EC 1.16.3.2) (Ferritin-1)	P0A998	4	100	161	97.6	2.16	228.3	12	2.16	175.2
FTSP	Cell division protein FtsP	P26648	2	100	266	56.6	2.26		3	2.37	256.4
FTSQ	Cell division protein FtsQ	P06136/J7Q602	3	75	203	73.6	2.77	136.6	3	2.77	136.6
FTSY	Signal recognition particle receptor FtsY (SRP receptor)	P10121	9	69.2	280	56.3	2.02	99.1	9	2.02	99.1
FUCA	L-fuculose phosphate aldolase (EC 4.1.2.17) (L-fuculose-1-phosphate aldolase)	P0AB87	16	94.1	206	95.8	2.15	169.1	16	2.15	169.1
FUCI	L-fucose isomerase (FucIase) (EC 5.3.1.25) (6-deoxy-L-galactose isomerase) (D-arabinose isomerase) (EC 5.3.1.3)	P69922	1	100	591	100	2.5		6	2.5	1099.4
FUCO	Lactaldehyde reductase (EC 1.1.1.77) (Propanediol oxidoreductase)	P0A9S1	4	100	382	100	2.05	226.7	4	2.05	226.7
FUCU	L-fucose mutarotase (EC 5.1.3.29) (Fucose 1-epimerase) (Type-2 mutarotase)	P0AEN8	1	100	140	100	1.9		7	1.9	123.5
FUMC	Fumarate hydratase class II (Fumarase C) (EC 4.2.1.2) (Aerobic fumarase) (Iron-independent fumarase)	P05042	7	100	455	97.4	2.17	324.2	7	2.17	324.2
FUSA	Elongation factor G (EF-G)	P0A6M8	2	100	653	92.8	2.9		8	2.9	202.1
G801_04654	PapG, lectin domain	A0A182DW20	6	100	196	99	1.8	154.6	6	1.8	154.6
G925_04926	Sugar transporter SemiSWEET	P0DMV3	2	100	86	96.6	2.5		7	2.57	77.8
GABD	Succinate-semialdehyde dehydrogenase [NADP(+)] GabD (SSDH) (EC 1.2.1.79)	P25526	1	100	481	99.8	2.3		4	2.3	1174.7
GABT	4-aminobutyrate aminotransferase GabT (EC 2.6.1.19) ((S)-3-amino-2-methylpropionate transaminase) (EC 2.6.1.22) (GABA aminotransferase) (GABA-AT) (Gamma-amino-N-butyrate transaminase) (GABA transaminase) (Glutamate:succinic semialdehyde transaminase) (L-AIBAT)	P22256	5	100	425	99.8	2.29	510	15	2.29	289.9
GADB	Glutamate decarboxylase beta (GAD-beta) (EC 4.1.1.15)	P69910	8	100	424	91	2.45	181.9	16	2.45	169.7
GALE	UDP-glucose 4-epimerase (EC 5.1.3.2) (Galactowaldenase) (UDP-galactose 4-epimerase)	P09147	18	100	338	100	1.85	184.1	18	1.85	184.1
GALT	Galactose-1-phosphate uridylyltransferase (Gal-1-P uridylyltransferase) (EC 2.7.7.12) (UDP-glucose--hexose-1-phosphate uridylyltransferase)	P09148	4	100	301	86.5	1.82	237.8	8	1.82	185.8
GAPA	Glyceraldehyde-3-phosphate dehydrogenase A (GAPDH-A) (EC 1.2.1.12) (NAD-dependent glyceraldehyde-3-phosphate dehydrogenase)	P0A9B2	9	69.2	330	99.7	2.01	150.1	9	2.01	150.1
GAPA_D1	Glyceraldehyde-3-phosphate dehydrogenase	(C9QTS9)/P0A9B4	2	100	330	99.7	2.63		6	2.78	429.9
GARL	5-keto-4-deoxy-D-glucarate aldolase (KDGluc aldolase) (KDGlucA) (EC 4.1.2.20) (2-dehydro-3-deoxy-D-glucarate aldolase) (2-keto-3-deoxy-D-glucarate aldolase) (5-dehydro-4-deoxy-D-glucarate aldolase) (Alpha-keto-beta-deoxy-D-glucarate aldolase)	P23522	2	100	253	98.8	2.2		4	2.2	356.6
GATD	Galactitol 1-phosphate 5-dehydrogenase (EC 1.1.1.251)	P0A9S3	4	100	346	100	1.88	171.1	4	1.88	171.1
GCL	Glyoxylate carboligase (EC 4.1.1.47) (Tartronate-semialdehyde synthase)	P0AEP7	1	100	592	99.8	2.7		6	2.7	3319.8
GCVH	Glycine cleavage system H protein	P0A6T9	6	100	126	97.7	2	92	6	2	92
GCVT	Aminomethyltransferase (EC 2.1.2.10) (Glycine cleavage system T protein)	P27248	4	100	361	99.2	1.91	281.7	9	1.95	189
GDHA	NADP-specific glutamate dehydrogenase (NADP-GDH) (EC 1.4.1.4)	P00370	2	66.7	442	98.9	2.85		7	2.7	123.9
GDHA(ECS2467)	Glutamate dehydrogenase	Q8XDW9	2	100	442	98.9	4.5		9	2.55	132.3
GFCC	Uncharacterized protein	B7UN63	1	100	224	90.3	1.91		4	1.91	197.5
GGT	Gamma-glutamyltranspeptidase (EC 2.3.2.2) (Glutathione hydrolase) (EC 3.4.19.13) [Cleaved into: Gamma-glutamyltranspeptidase large chain; Gamma-glutamyltranspeptidase small chain]	P18956	10	90.9	349	60.2	1.81	305.1	10	1.81	305.1
GLCB	Malate synthase G	P37330	2	100	412	57	1.98		3	1.97	310.4
GLDA	Glycerol dehydrogenase	P0A9S5	1	100	367	100	2.79		4	2.79	384.5
GLGA	Glycogen synthase (EC 2.4.1.21) (Starch [bacterial glycogen] synthase)	P0A6U8	7	100	475	99.6	2.46	175.4	7	2.46	175.4
GLGC	Glucose-1-phosphate adenylyltransferase (EC 2.7.7.27) (ADP-glucose pyrophosphorylase) (ADPGlc PPase) (ADP-glucose synthase)	P0A6V1	3	100	314	72.9	2.93	397.6	9	2.93	191.3
GLK	Glucokinase	P0A6V9	2	100	319	99.4	2.28		4	2.28	131.1
GLMS	Glutamine--fructose-6-phosphate aminotransferase [isomerizing] (EC 2.6.1.16) (D-fructose-6-phosphate amidotransferase) (GFAT) (Glucosamine-6-phosphate synthase) (Hexosephosphate aminotransferase) (L-glutamine--D-fructose-6-phosphate amidotransferase)	P17169	9	81.8	359	58.9	2.37	99.9	9	2.37	99.9
GLMU	Bifunctional protein GlmU [Includes: UDP-N-acetylglucosamine pyrophosphorylase (EC 2.7.7.23) (N-acetylglucosamine-1-phosphate uridyltransferase); Glucosamine-1-phosphate N-acetyltransferase (EC 2.3.1.157)]	P0ACC7	6	75	323	70.8	2.27	152.6	6	2.27	152.6
GLNH	Glutamine-binding periplasmic protein	P0AEQ3	2	100	220	88.7	2.12		3	2.18	96.1
GLNK	Nitrogen regulatory protein P-II 2	P0AC55	3	75	112	100	2.15	138.1	8	2.37	93.7
GLNS	Glutamine--tRNA ligase (EC 6.1.1.18) (Glutaminyl-tRNA synthetase) (GlnRS)	P00962/A0A140NAB7	18	94.4	432	78	2.63	177.9	18	2.63	177.9
GLOA	Lactoylglutathione lyase (EC 4.4.1.5) (Aldoketomutase) (Glyoxalase I) (Glx I) (Ketone-aldehyde mutase) (Methylglyoxalase) (S-D-lactoylglutathione methylglyoxal lyase)	P0AC81	5	100	126	93.3	1.76	288	5	1.76	288
GLPD	Aerobic glycerol-3-phosphate dehydrogenase (EC 1.1.5.3)	P13035	5	100	494	98.6	2.04	369.3	5	2.04	369.3
GLPF	Glycerol uptake facilitator protein (Aquaglyceroporin)	P0AER0	4	100	254	90.4	2.45	340.4	4	2.45	340.4
GLPG	Rhomboid protease GlpG (EC 3.4.21.105) (Intramembrane serine protease)	P09391(U6NA71)	23	67.6	178	64.5	2.2	83.2	23	2.2	83.2
GLPQ	Glycerophosphodiester phosphodiesterase, periplasmic (Glycerophosphoryl diester phosphodiesterase, periplasmic) (EC 3.1.4.46)	P09394	2	100	327	91.3	1.85		6	1.9	267.4
GLPX	Fructose-1,6-bisphosphatase 1 class 2 (FBPase 1 class 2) (EC 3.1.3.11) (D-fructose-1,6-bisphosphate 1-phosphohydrolase 1 class 2)	P0A9C9	4	80	238	70.8	2.03	361.2	4	2.03	361.2
GLSA1	Glutaminase 1	P77454	1	100	309	99.7	1.61		4	1.61	604.6
GLTA	Citrate synthase (EC 2.3.3.16)	P0ABH7	9	100	426	99.8	2.27	130.3	9	2.27	130.3
GLYA	Serine hydroxymethyltransferase (SHMT) (Serine methylase) (EC 2.1.2.1)	P0A825	3	100	416	99.8	2.8	169.1	5	2.7	173.1
GMHB	D-glycero-beta-D-manno-heptose-1,7-bisphosphate 7-phosphatase (EC 3.1.3.82) (D,D-heptose 1,7-bisphosphate phosphatase) (HBP phosphatase)	P63228	8	100	182	95.3	1.83	190.3	8	1.83	190.3
GMK	Guanylate kinase (EC 2.7.4.8) (GMP kinase)	P60546	5	83.3	203	98.1	2.72	78.7	5	2.72	78.7
GMM	GDP-mannose mannosyl hydrolase (GDPMH) (EC 3.6.1.-) (Colanic acid biosynthesis protein WcaH)	P32056	4	80	148	93.1	1.58	192.3	9	1.66	137
GND	6-phosphogluconate dehydrogenase, decarboxylating (EC 1.1.1.44)	P00350	3	100	464	99.1	1.53	572.3	6	1.53	224.1
GNSA	Protein GnsA	P0AC92	2	100	56	98.2	1.88		3	1.9	337.7
GNTK	Thermoresistant gluconokinase (EC 2.7.1.12) (Gluconate kinase 2)	P46859	4	66.7	171	97.7	2.37	117	7	2.51	93.8
GOR	Glutathione reductase (GR) (GRase) (EC 1.8.1.7)	P06715	4	100	448	99.6	1.95	407.6	8	1.95	279.3
GPR	L-glyceraldehyde 3-phosphate reductase (GAP reductase) (EC 1.1.1.-)	Q46851	3	100	229	66.2	2.08	571.5	9	2.08	367.7
GPT	Xanthine phosphoribosyltransferase (EC 2.4.2.22) (Xanthine-guanine phosphoribosyltransferase) (XGPRT)	P0A9M5(H0Q6L9)	4	57.1	148	97.4	2.35	257	9	2.4	168.6
GREB	Transcription elongation factor GreB (Transcript cleavage factor GreB)	P30128	1	100	156	98.7	2.6		6	2.6	907.9
GRLR	L0044	O85638/Q7DB61	3	100	111	90.2	2.37		6	2.37	114.3
GROEL	60 kDa chaperonin	Q548M1	4	100	524	95.6	3.36	53.2	4	3.36	53.2
GROL	60 kDa chaperonin (GroEL protein) (Protein Cpn60)	P0A6F5	20	64.5	518	94.5	3.02	42.4	20	3.02	42.4
GROL_UT	60 kDa chaperonin	Q1R3B6	1	100	524	95.6	3.94		14	3.94	1223.5
GROS	10 kDa chaperonin (GroES protein) (Protein Cpn10)	P0A6F9	6	85.7	97	100	3.07	92.3	22	3.2	71
GROS_X	10 kDa chaperonin	Q7BGE6	2	100	97	100	3.75		12	3.75	46.4
GSHA	Glutamate--cysteine ligase (EC 6.3.2.2) (Gamma-ECS) (GCS) (Gamma-glutamylcysteine synthetase)	P0A6W9	4	100	244	47.1	2.4	242.1	4	2.4	242.1
GSHB	Glutathione synthetase	P04425	4	100	163	51.6	2.23	245.2	4	2.23	245.2
GSS	Bifunctional glutathionylspermidine synthetase/amidase (GspSA) [Includes: Glutathionylspermidine amidase (Gsp amidase) (EC 3.5.1.78) (Glutathionylspermidine amidohydrolase [spermidine-forming]); Glutathionylspermidine synthetase (Gsp synthetase) (EC 6.3.1.8) (Glutathione:spermidine ligase [ADP-forming]) (Gsp synthase)]	P0AES0	6	66.7	379	61.2	2.47	131.4	6	2.47	131.4
GSTA	Glutathione S-transferase GstA	P0A9D2	2	100	201	100	2		3	2.03	305.5
GUAA	GMP synthase [glutamine-hydrolyzing]	P04079	1	100	341	65	2.2		4	2.2	248.3
GUAD	Guanine deaminase	P76641	2	100	338	77	2.3		8	2.3	205.7
GUDD	Glucarate dehydratase (GDH) (GlucD) (EC 4.2.1.40)	P0AES2	8	88.9	441	98.9	2.12	235.8	8	2.12	235.8
GUDX	Glucarate dehydratase-related protein (GDH-RP) (GlucDRP) (EC 4.2.1.-)	Q46915	2	100	439	98.4	2.45		5	2.66	271.8
GYRA	DNA gyrase subunit A	P0AES4/P0AES5	2	28.6	385	44	2.96		6	3.07	148.8
GYRB	DNA gyrase subunit B (EC 5.99.1.3) (Type IIA topoisomerase subunit GyrB)	P0AES6	8	32	298	37.1	2	161	8	2	161
HCHA	Protein deglycase 1 (EC 3.1.2.-) (EC 3.5.1.124) (Glyoxalase III) (EC 4.2.1.130) (Holding molecular chaperone) (Hsp31)	P31658	5	100	276	97.5	2.32	164.5	5	2.32	164.5
HDA	DnaA regulatory inactivator Hda	P69933	1	100	176	75.5	3.24		3	3.24	497
HDEA	Acid stress chaperone HdeA (10K-S protein)	P0AES9	2	100	76	69.1	2.1		9	2.07	86.2
HDEB	Acid stress chaperone HdeB	P0AET2	1	100	69	63.9	1.5		4	1.5	146.5
HDHA	7-alpha-hydroxysteroid dehydrogenase (7-alpha-HSDH) (EC 1.1.1.159)	P0AET8	3	100	253	99.2	2.13	375.6	6	2.13	215.6
HEMB	Delta-aminolevulinic acid dehydratase (ALAD) (ALADH) (EC 4.2.1.24) (Porphobilinogen synthase)	P0ACB2	5	100	323	99.7	1.92	176.2	5	1.92	176.2
HEMC	Porphobilinogen deaminase (PBG) (EC 2.5.1.61) (Hydroxymethylbilane synthase) (HMBS) (Pre-uroporphyrinogen synthase)	P06983	5	100	247	78.9	2.08	238.7	5	2.08	238.7
HFQ	RNA-binding protein Hfq (HF-1) (Host factor-I protein) (HF-I)	P0A6X3	15	100	60	58.8	2.28	90.2	15	2.28	90.2
HFQ_45	RNA-binding protein Hfq	B7MKX6/(K0BDC5)	2	66.7	60	58.8	2.15		4	2.15	188.4
HFQ_BD	RNA-binding protein Hfq	A0A140NGK1	2	100	60	58.8	1.85		9	1.87	138.9
HFQ_X	RNA-binding protein Hfq	C1IFD2	2	66.7	60	58.8	1.64		8	1.64	129
HIGA	Antitoxin HigA	P67701	2	66.7	110	79.7	2.55		3	2.73	114.5
HINT	Purine nucleoside phosphoramidase (EC 3.9.1.-) (Histidine triad nucleotide binding protein HinT) (HIT protein)	P0ACE7	2	100	112	94.1	1.59		8	1.59	159.2
HIPA	Serine/threonine-protein kinase HipA (Ser/Thr-protein kinase HipA) (EC 2.7.11.1) (Toxin HipA)	P23874	12	92.3	240	54.5	2.53	93.1	12	2.53	93.1
HIPB	Antitoxin HipB	P23873	12	100	68	77.3	2.84	78.2	18	2.96	68.2
HISB	Histidine biosynthesis bifunctional protein HisB	Q9S5G5	5	100	113	31.8	1.85	210.2	7	1.89	194
HISC	Histidinol-phosphate aminotransferase (EC 2.6.1.9) (Imidazole acetol-phosphate transaminase) (HPAT) (HspAT)	P06986	6	100	320	89.9	2.07	267.5	6	2.07	267.5
HISD	Histidinol dehydrogenase (HDH) (EC 1.1.1.23)	P06988	4	100	431	99.3	1.91	323.8	4	1.91	323.8
HISJ	Histidine-binding periplasmic protein	P0AEU0/P02910	2	100	238	91.5	2.2		3	2.09	212.2
HISS	Histidine--tRNA ligase	P60906	4	100	174	41	2.68	201	10	2.68	158.9
HIUH	5-hydroxyisourate hydrolase (HIU hydrolase) (HIUHase) (EC 3.5.2.17) (Transthyretin-like protein) (TLP) (Transthyretin-related protein) (TRP)	P76341	3	100	111	81	1.85	348	12	1.85	154.7
HLDD	ADP-L-glycero-D-manno-heptose-6-epimerase (EC 5.1.3.20) (ADP-L-glycero-beta-D-manno-heptose-6-epimerase) (ADP-glyceromanno-heptose 6-epimerase) (ADP-hep 6-epimerase) (AGME)	P67910/P67911	3	100	307	99	2.39	444.5	9	2.39	256.1
HLYB	Alpha-hemolysin translocation ATP-binding protein HlyB	P08716	9	100	241	34.1	2.13	64.9	9	2.13	64.9
HLYE	Hemolysin E, chromosomal (Cytotoxin ClyA) (Hemolysis-inducing protein) (Latent pore-forming 34 kDa hemolysin) (Silent hemolysin SheA)	P77335	4	100	285	94.1	2.34	42.4	4	2.34	42.4
HOLA	DNA polymerase III subunit delta (EC 2.7.7.7)	P28630	6	66.7	333	97.1	3.4	58.3	6	3.4	58.3
HOLB	DNA polymerase III subunit delta' (EC 2.7.7.7)	P28631	6	75	334	100	3.4	85.6	6	3.4	85.6
HOLC	DNA polymerase III subunit chi	P28905	2	100	146	99.3	1.98		3	2.02	285.6
HOLD	DNA polymerase III subunit psi	P28632	2	66.7	102	74.5	1.98		3	2.02	182
HPAB	4-hydroxyphenylacetate 3-monooxygenase oxygenase component	A0A140NG21/A0A2G8ZEZ1	2	50	518	99.6	2.09		5	2.26	299
HPAH	2-oxo-hepta-3-ene-1,7-dioic acid hydratase	Q46982	1	33.3	267	100	1.69		4	1.69	367.4
HPCD	5-carboxymethyl-2-hydroxymuconate Delta-isomerase	Q05354	1	100	125	99.2	2.1		3	2.1	390
HPCE	Homoprotocatechuate catabolism bifunctional isomerase/decarboxylase	P37352	2	100	235	55	1.7		8	1.7	268.7
HPCH	4-hydroxy-2-oxo-heptane-1,7-dioate aldolase	B1IS70/Q47098	8	100	251	95.8	1.87	211.6	8	1.87	211.6
HPH	Hygromycin-B 4-O-kinase	P00557	8	100	292	85.6	1.89	220.7	8	1.89	220.7
HPT	Hypoxanthine phosphoribosyltransferase (HPRT) (EC 2.4.2.8)	P0A9M2	9	100	99	55.6	2.75	127.2	9	2.75	127.2
HSCB	Co-chaperone protein HscB	P0A6L9	1	100	127	74.3	1.8		3	1.8	146.3
HSDR	Type I restriction enzyme EcoR124II R protein	P10486	5	83.3	392	37.9	2.71	216.6	10	2.71	198.6
HSLO	33 kDa chaperonin (Heat shock protein 33) (HSP33)	P0A6Y5	3	100	227	77.7	2.6	98.6	3	2.6	98.6
HSLU	ATP-dependent protease ATPase subunit HslU (Heat shock protein HslU) (Unfoldase HslU)	P0A6H5	9	81.8	224	50.6	3.6	117.4	9	3.6	117.4
HSLV	ATP-dependent protease subunit HslV (EC 3.4.25.2) (Heat shock protein HslV)	P0A7B8/B7LA29	9	90	172	97.7	3.48	83.1	9	3.48	83.1
HTPG	Chaperone protein HtpG (Heat shock protein C62.5) (Heat shock protein HtpG) (High temperature protein G)	P0A6Z3	4	57.1	364	58.3	3.21	68.1	4	3.21	68.1
HUPA	DNA-binding protein HU-alpha	P0ACF0	8	100	54	60	2.89	122.1	12	3	112.8
HUPB	DNA-binding protein HU-beta	P0ACF4	3	75	54	60	2.28	354.2	3	2.28	354.2
HYAA	Hydrogenase-1 small chain (HYD1) (EC 1.12.99.6) (Membrane-bound hydrogenase 1 small subunit) (NiFe hydrogenase)	P69739	12	92.3	263	70.7	1.6	214.5	12	1.6	214.5
HYAA_6	Hydrogenase-1 small chain	P69740	5	100	263	70.7	1.47	178.2	10	1.47	166.5
HYAB	Hydrogenase-1 large chain (HYD1) (EC 1.12.99.6) (Membrane-bound hydrogenase 1 large subunit) (NiFe hydrogenase)	P0ACD8	11	100	581	97.3	1.59	197.5	11	1.59	197.5
HYBC	Hydrogenase-2 large chain	P0ACE0/P0ACE1	6	100	551	97.2	1.65	377	12	1.65	348.3
HYBD	Hydrogenase 2 maturation protease (EC 3.4.23.-)	P37182	1	100	159	97	2.2		6	2.2	823.7
HYBO	Hydrogenase-2 small chain	P69741/B7LGE4	6	100	267	71.8	1.65	332.2	12	1.65	306.9
HYPE	Hydrogenase isoenzymes formation protein HypE	P24193/A0A0H3JHA1	2	100	288	85.7	2.26		5	2.1	329.6
HYPF	Carbamoyltransferase HypF	A0A0H3JHT3	6	100	646	86.1	2.06	269	6	2.06	269
IAAA	Isoaspartyl peptidase (EC 3.4.19.5) (Beta-aspartyl-peptidase) (EcAIII) (Isoaspartyl dipeptidase) [Cleaved into: Isoaspartyl peptidase subunit alpha; Isoaspartyl peptidase subunit beta]	P37595	6	100	156	48.6	1.91	193.6	11	1.93	175.3
IADA	Isoaspartyl dipeptidase (EC 3.4.19.-)	P39377	8	100	288	73.8	2.21	184.6	15	2.17	177.4
ICD	Isocitrate dehydrogenase [NADP] (IDH) (EC 1.1.1.42) (IDP) (NADP(+)-specific ICDH) (Oxalosuccinate decarboxylase)	P08200	35	100	414	99.5	2.3	95.2	35	2.3	95.2
ICLR	Transcriptional repressor IclR (Acetate operon repressor)	P16528	3	100	176	64.2	1.93	195.5	6	1.93	108.8
IDI	Isopentenyl-diphosphate Delta-isomerase (IPP isomerase) (EC 5.3.3.2) (IPP:DMAPP isomerase) (Isopentenyl pyrophosphate isomerase)	Q46822	16	88.9	175	96.2	1.87	151.9	16	1.87	151.9
IDND	L-idonate 5-dehydrogenase (NAD(P)(+))	P39346	1	100	343	100	2.61		4	2.61	280.4
IHFA	Integration host factor subunit alpha (IHF-alpha)	P0A6X7	7	100	92	92.9	2.3	205.2	7	2.3	205.2
IHFB	Integration host factor subunit beta (IHF-beta)	P0A6Y1	5	71.4	93	98.9	2.19	269.4	5	2.19	269.4
ILVC	Ketol-acid reductoisomerase (NADP(+)) (KARI) (EC 1.1.1.86) (Acetohydroxy-acid isomeroreductase) (AHIR) (Alpha-keto-beta-hydroxylacyl reductoisomerase) (Ketol-acid reductoisomerase type 2) (Ketol-acid reductoisomerase type II)	P05793	2	100	397	80.9	2.45		6	2.5	171.2
ILVE	Branched-chain-amino-acid aminotransferase (BCAT) (EC 2.6.1.42) (Transaminase B)	P0AB80	6	100	170	55	2.23	189.2	6	2.23	189.2
ILVN	Acetolactate synthase isozyme 1 small subunit	P0ADF8/P0ADG0	4	100	90	93.8	2.15	161.9	13	2.09	104.8
IMM	Colicin-E3 immunity protein	P02984	5	100	84	98.8	2.5	111.7	5	2.5	111.7
(IMM7)	Colicin-E7 immunity protein	Q03708	12	92.3	84	96.6	2.06	71.5	12	2.06	71.5
(IMM9)	Colicin-E9 immunity protein	P13479	14	87.5	82	95.3	1.94	95.6	14	1.94	95.6
ISCA	Iron-binding protein IscA (Iron-sulfur cluster assembly protein)	P0AAC8	3	100	96	89.7	2.42	158.2	6	2.42	96.6
ISCR	HTH-type transcriptional regulator IscR	P0AGK8/C3SZN7	4	100	83	51.2	2.4	151.9	8	2.4	109.2
ISCS	Cysteine desulfurase IscS	P0A6B7/P0A6B9	5	100	325	80.4	2.4	240.8	8	2.33	234.8
ISPA	Farnesyl diphosphate synthase (FPP synthase) (EC 2.5.1.10) ((2E,6E)-farnesyl diphosphate synthase) (Geranyltranstransferase)	P22939	2	100	298	99.7	2.19		4	2.19	362.9
ISPD	2-C-methyl-D-erythritol 4-phosphate cytidylyltransferase (EC 2.7.7.60) (4-diphosphocytidyl-2C-methyl-D-erythritol synthase) (CDP-ME synthase) (MEP cytidylyltransferase) (MCT)	Q46893	7	100	202	85.6	1.97	113.2	7	1.97	113.2
ISPE	4-diphosphocytidyl-2-C-methyl-D-erythritol kinase	P62615/Q8FI04	2	100	282	99.6	2.01		4	2.01	209.2
ISPF	2-C-methyl-D-erythritol 2,4-cyclodiphosphate synthase (MECDP-synthase) (MECPP-synthase) (MECPS) (EC 4.6.1.12)	P62617	18	100	155	97.5	2.6	106.8	18	2.6	106.8
ISPH	4-hydroxy-3-methylbut-2-enyl diphosphate reductase (EC 1.17.7.4)	P62623	24	100	309	97.8	1.74	235.8	24	1.74	235.8
ISPH_D1	4-hydroxy-3-methylbut-2-enyl diphosphate reductase (EC 1.17.7.4)	(C9QSC3)	4	100	309	97.8	1.83	421	8	1.83	300.3
ISPU	Ditrans,polycis-undecaprenyl-diphosphate synthase ((2E,6E)-farnesyl-diphosphate specific)	P60472	10	37	222	87.7	1.92	98.7	10	1.92	98.7
IVY	Inhibitor of vertebrate lysozyme	P0AD59	2	100	126	80.3	1.59		4	1.59	127
KATE	Catalase HPII (EC 1.11.1.6) (Hydroxyperoxidase II)	P21179	41	95.3	726	96.4	1.89	241.8	41	1.89	241.8
KATG	Catalase-peroxidase (CP) (EC 1.11.1.21) (Hydroperoxidase I) (HPI) (Peroxidase/catalase)	P13029	3	100	292	40.2	2.2	169	5	2	129.5
KDPE	KDP operon transcriptional regulatory protein KdpE	P21866	5	83.3	116	51.6	2.37	105.4	5	2.37	105.4
KDPF	Potassium-transporting ATPase KdpF subunit	P36937	1	100	27	93.1	2.9		3	2.9	994.8
KDSA	2-dehydro-3-deoxyphosphooctonate aldolase (EC 2.5.1.55) (3-deoxy-D-manno-octulosonic acid 8-phosphate synthase) (KDO-8-phosphate synthase) (KDO 8-P synthase) (KDOPS) (Phospho-2-dehydro-3-deoxyoctonate aldolase)	P0A715	10	100	205	72.2	2.64	94.4	10	2.64	94.4
KDSB	3-deoxy-manno-octulosonate cytidylyltransferase (EC 2.7.7.38) (CMP-2-keto-3-deoxyoctulosonic acid synthase) (CKS) (CMP-KDO synthase)	P04951	3	100	171	69	2.34	121.7	6	2.34	92.9
KDSC	3-deoxy-D-manno-octulosonate 8-phosphate phosphatase KdsC	P67653	6	100	173	92	2.25	186.3	18	2.25	156.5
KDSD	Arabinose 5-phosphate isomerase KdsD	P45395	1	100	172	52.4	2.6		4	2.6	254.9
KDUI	4-deoxy-L-threo-5-hexosulose-uronate ketol-isomerase (EC 5.3.1.17) (5-keto-4-deoxyuronate isomerase) (DKI isomerase)	Q46938	2	100	191	68.7	2.27		4	2.27	368.5
KEFC	Glutathione-regulated potassium-efflux system protein KefC	P03819	3	100	161	26	2.08	330.8	6	2.08	171.9
KEFF	Glutathione-regulated potassium-efflux system ancillary protein KefF (Quinone oxidoreductase KefF) (EC 1.6.5.2)	P0A754	3	100	174	98.9	2.08	423.6	6	2.08	245.3
KPSU	3-deoxy-manno-octulosonate cytidylyltransferase	P42216	8	100	241	98	2.3	150	8	2.3	150
LACA	Galactoside O-acetyltransferase (GAT) (EC 2.3.1.18) (Thiogalactoside acetyltransferase)	P07464	4	100	200	98.5	2.83	389.6	4	2.83	389.6
LACI	Lactose operon repressor	P03023	14	100	268	74.4	2.97	62.7	14	2.97	62.7
LACY	Lactose permease (Lactose-proton symport)	P02920	5	62.5	417	100	3.39	82.7	5	3.39	82.7
LACZ	Beta-galactosidase (Beta-gal) (EC 3.2.1.23) (Lactase)	P00722	54	98.2	1011	98.7	2.18	231.9	54	2.18	231.9
LAMB	Maltoporin (Lambda receptor protein) (Maltose-inducible porin)	P02943	6	100	421	94.4	2.85	153.4	6	2.85	153.4
LDCA	Murein tetrapeptide carboxypeptidase	P76008	2	100	185	60.9	1.75		3	1.75	346.5
LDHA	D-lactate dehydrogenase	P52643/A0A140N893	2	100	258	78.4	2.64		6	2.41	158.1
LEPA	Elongation factor 4 (EF-4) (EC 3.6.5.n1) (Ribosomal back-translocase LepA)	P60785	1	100	499	83.3	2.8		6	2.8	180.5
LEPB	Signal peptidase I	P00803	3	50	181	55.9	2.25	184.6	4	2.29	176.8
LEUO	HTH-type transcriptional regulator LeuO	P10151	3	100	119	37.9	1.73	205.5	3	1.73	205.5
LEUS	Leucine--tRNA ligase (EC 6.1.1.4) (Leucyl-tRNA synthetase) (LeuRS)	P07813	7	43.8	860	100	2.76	140.3	7	2.76	140.3
LEXA	LexA repressor (EC 3.4.21.88)	P0A7C2	7	100	104	51.5	2.4	63.2	7	2.4	63.2
LIGA	DNA ligase (EC 6.5.1.2) (Polydeoxyribonucleotide synthase [NAD(+)])	P15042	3	100	478	71.2	1.92	82.6	3	1.92	82.6
LIVJ	Leu/Ile/Val-binding protein (LIV-BP)	P0AD96	5	100	344	93.7	1.98	91.5	5	1.98	91.5
LIVK	Leucine-specific-binding protein (L-BP) (LS-BP)	P04816	4	100	345	93.5	1.93	87.1	4	1.93	87.1
LNT	Apolipoprotein N-acyltransferase (ALP N-acyltransferase) (EC 2.3.1.-) (Copper homeostasis protein CutE)	P23930	5	100	296	57.8	2.61	207.5	8	2.68	189.9
LOLA	Outer-membrane lipoprotein carrier protein (P20)	P61316	4	57.1	182	89.7	2.15	38.1	6	2.16	37.1
LOLB	Outer-membrane lipoprotein LolB	P61320	5	100	176	85	2.11	93.6	6	2.08	92.5
LOLC	Lipoprotein-releasing system transmembrane protein LolC	P0ADC3	2	66.7	218	54.6	1.94		4	1.94	199.8
LPDA	Dihydrolipoyl dehydrogenase (EC 1.8.1.4) (Dihydrolipoamide dehydrogenase) (E3 component of pyruvate and 2-oxoglutarate dehydrogenases complexes) (Glycine cleavage system L protein)	P0A9P0/C3TQA2	2	100	469	98.9	2.34		8	2.25	253.1
LPLA	Lipoate-protein ligase A (EC 6.3.1.20) (Lipoate--protein ligase)	P32099	6	100	174	51.5	2.69	64.7	6	2.69	64.7
LPP	Major outer membrane prolipoprotein Lpp	P69776	5	62.5	52	66.7	1.66	124.2	8	1.6	124.4
LPTA	Lipopolysaccharide export system protein LptA	P0ADV1	2	100	82	44.3	2.71		9	3.02	47.9
LPTB	Lipopolysaccharide export system ATP-binding protein LptB (EC 3.6.3.-)	P0A9V1	5	100	233	96.7	1.84	105.8	5	1.84	105.8
LPTC	Lipopolysaccharide export system protein LptC	P0ADV9	2	100	124	64.9	2.5		3	2.6	216
LPTD	LPS-assembly protein LptD	P31554/Q83SQ0	2	100	555	70.8	2.88		3	3.04	371.6
LPTE	LPS-assembly lipoprotein LptE	P0ADC1/Q83LX4	2	50	150	77.7	2.88		3	3.04	348
LPXA	Acyl-[acyl-carrier-protein]--UDP-N-acetylglucosamine O-acyltransferase (UDP-N-acetylglucosamine acyltransferase) (EC 2.3.1.129)	P0A722	8	100	262	100	2.04	205.5	8	2.04	205.5
LPXB	Lipid-A-disaccharide synthase (EC 2.4.1.182)	P10441	3	100	305	79.8	2.03	387.9	3	2.03	387.9
LPXC	UDP-3-O-acyl-N-acetylglucosamine deacetylase	P0A725/(D5CV28/K0BGQ2)	8	100	300	98.4	2.05	125.2	8	2.05	125.2
LPXD	UDP-3-O-(3-hydroxymyristoyl)glucosamine N-acyltransferase (UDP-3-O-(3-OHC14)-GlcN N-acyltransferase) (EC 2.3.1.191) (Protein FirA) (Rifampicin resistance protein) (UDP-3-O-(3-hydroxytetradecanoyl)glucosamine N-acyltransferase)	P21645	4	100	336	98.5	2.43	196.7	4	2.43	196.7
LRP	Leucine-responsive regulatory protein	P0ACJ0	1	100	151	92.1	3.2		4	3.2	94.9
LSRF	3-hydroxy-5-phosphonooxypentane-2,4-dione thiolase (EC 2.3.1.245)	P76143	1	25	281	96.6	2.51		9	2.51	136.9
LSRG	(4S)-4-hydroxy-5-phosphonooxypentane-2,3-dione isomerase	D3QT67	1	100	96	100	1.8		4	1.8	171.3
LSRK	Autoinducer-2 kinase	P77432	3	100	309	58.3	2.8	539.4	6	2.8	405.8
LSRR	Transcriptional regulator LsrR	P76141	2	28.6	306	96.5	2.91		8	2.91	105.3
LTAE	Low specificity L-threonine aldolase (Low specificity L-TA) (EC 4.1.2.48)	P75823/(E7U392/L4EJM2)	5	100	331	99.4	2.18	241.3	12	2.17	188.6
LYSC	Lysine-sensitive aspartokinase 3	P08660	2	100	357	79.5	2.65		3	2.7	228.4
LYSU	Lysine--tRNA ligase, heat inducible (EC 6.1.1.6) (Lysyl-tRNA synthetase) (LysRS)	P0A8N5	4	66.7	342	67.7	2.5	161.7	6	2.6	152.5
(M1E1G6)	Protein B	M1E1G6	5	100	91	91.9	3.5	100.4	5	3.5	100.4
MAA	Maltose O-acetyltransferase	P77791	1	100	182	99.5	2.15		3	2.15	937.8
MALE	Maltose-binding periplasmic protein (MBP) (MMBP) (Maltodextrin-binding protein)	P0AEX9	183	87.1	352	88.9	2.33	60.4	183	2.33	60.4
MALE_57	Maltose-binding periplasmic protein	P0AEY0	30	73.2	357	90.2	2.45	53.1	30	2.45	53.1
MALF	Maltose transport system permease protein MalF	P02916	12	100	242	47.1	2.9	83.4	12	2.9	83.4
MALG	Maltose transport system permease protein MalG	P68183	10	83.3	273	92.2	2.75	80.1	11	2.85	74.6
MALK	Maltose/maltodextrin import ATP-binding protein MalK (EC 3.6.3.19)	P68187	17	94.4	367	98.9	2.83	60.9	17	2.83	60.9
MALP	Maltodextrin phosphorylase (EC 2.4.1.1)	P00490	11	100	796	99.9	2.29	161	11	2.29	161
MALQ	4-alpha-glucanotransferase (EC 2.4.1.25) (Amylomaltase) (Disproportionating enzyme) (D-enzyme)	P15977	3	100	637	91.8	2.33	292.1	5	2.38	221.2
MAP	Methionine aminopeptidase (MAP) (MetAP) (EC 3.4.11.18) (Peptidase M)	P0AE18	39	100	258	97.7	1.71	132.8	39	1.71	132.8
MAP_X	Methionine aminopeptidase	C3TPN7/A0A140NFG5	3	100	262	99.2	1.49	393.9	4	1.48	301.5
MARR	Multiple antibiotic resistance protein MarR	P27245	5	83.3	136	94.4	2.55	70.8	6	2.57	65
MATP	Macrodomain Ter protein	P0A8N0	1	100	147	98	3.55		8	3.55	61.4
MAZE	Antitoxin MazE	P0AE72	2	50	44	53.7	1.68		3	1.67	100.1
MAZF	Endoribonuclease MazF (EC 3.1.27.-) (Toxin MazF) (mRNA interferase MazF)	P0AE70	10	83.3	84	75.7	2.45	79.2	10	2.45	79.2
MCBB	Microcin B17-processing protein McbB	P23184	4	100	282	95.6	2.25	361.6	7	2.19	77.1
MCBC	Microcin B17-processing protein McbC	P23185	4	100	265	97.4	2.25	462.8	4	2.25	462.8
MCBD	Microcin B17-processing protein McbD	P23186	4	100	358	90.4	2.25	301.3	4	2.25	301.3
MCCA	Microcin C7	Q47505	3	60	7	100	2.21	66.3	4	2.08	55.2
MCCB	MccB protein	Q47506	4	57.1	262	74.9	2.28	186.9	7	2.2	147.8
MCCE	MccE protein	Q47510	5	100	180	34.5	1.34	455.7	7	1.31	272.9
MCCF	Microcin C7 self-immunity protein MccF	Q47511	9	100	335	97.4	1.38	462.3	17	1.37	456.9
MCJD	Microcin-J25 export ATP-binding/permease protein McjD	Q9X2W0	4	100	571	98.4	3.56	212.4	7	3.39	192.8
MCR1	Probable phosphatidylethanolamine transferase Mcr-1	A0A0R6L508	7	87.5	307	56.7	1.64	265.6	7	1.64	265.6
MCRB(Nt)	5-methylcytosine-specific restriction enzyme B (EC 3.1.21.-) (EcoKMcrBC)	P15005	6	100	152	33.1	1.99	118.7	7	1.94	108.7
MDFA	Multidrug transporter MdfA (Chloramphenicol resistance pump Cmr)	P0AEY8	3	100	391	95.4	2.22	524.8	3	2.22	524.8
MDH	Malate dehydrogenase (EC 1.1.1.37)	P61889	6	75	312	100	2	147.6	10	2.03	132.9
MENB	1,4-dihydroxy-2-naphthoyl-CoA synthase (DHNA-CoA synthase) (EC 4.1.3.36)	P0ABU0	6	100	181	63.5	2.14	319.4	6	2.14	319.4
MENC	o-succinylbenzoate synthase (OSB synthase) (OSBS) (EC 4.2.1.113) (4-(2'-carboxyphenyl)-4-oxybutyric acid synthase) (o-succinylbenzoic acid synthase)	P29208	4	100	194	60.6	1.84	171.1	7	2.03	120.6
MEND	2-succinyl-5-enolpyruvyl-6-hydroxy-3-cyclohexene-1-carboxylate synthase (SEPHCHC synthase) (EC 2.2.1.9) (Menaquinone biosynthesis protein MenD)	P17109	14	87.5	556	100	2.08	315.7	19	2.15	287.8
MENF	Isochorismate synthase MenF (EC 5.4.4.2) (Isochorismate hydroxymutase) (Isochorismate mutase)	P38051	3	100	428	99.3	2.15	187.5	4	2.24	152.7
MENH	2-succinyl-6-hydroxy-2,4-cyclohexadiene-1-carboxylate synthase (SHCHC synthase) (EC 4.2.99.20)	P37355	6	100	252	100	2	121	11	2.05	109.4
MENI	1,4-dihydroxy-2-naphthoyl-CoA hydrolase (DHNA-CoA hydrolase) (EC 3.1.2.28) (DHNA-CoA thioesterase)	P77781	6	100	136	100	1.87	142.3	6	1.87	142.3
MEPA	Penicillin-insensitive murein endopeptidase (EC 3.4.24.-) (D-alanyl-D-alanine-endopeptidase) (DD-endopeptidase)	P0C0T5	2	100	222	81	1.9		7	2.11	164.4
MERB	Alkylmercury lyase	P77072	15	93.8	208	98.1	1.8	118.7	15	1.8	118.7
METB	Cystathionine gamma-synthase	P00935	1	100	384	99.5	1.5		4	1.5	408.6
METC	Cystathionine beta-lyase MetC (CBL) (EC 4.4.1.8) (Beta-cystathionase) (Cysteine lyase)	P06721	6	100	392	99.2	1.83	238.6	6	1.83	238.6
METF	5,10-methylenetetrahydrofolate reductase (EC 1.5.1.20)	P0AEZ1	9	100	164	55.4	2	186.5	9	2	186.5
METG	Methionine--tRNA ligase (EC 6.1.1.10) (Methionyl-tRNA synthetase) (MetRS)	P00959	11	84.6	544	80.4	1.73	272.2	11	1.73	272.2
METH	Methionine synthase (EC 2.1.1.13) (5-methyltetrahydrofolate--homocysteine methyltransferase) (Methionine synthase, vitamin-B12-dependent) (MS)	P13009	5	71.4	576	46.9	3	142.8	5	3	142.8
METI	D-methionine transport system permease protein MetI	P31547	5	100	203	93.5	3.39	67.3	10	3.39	54.9
METJ	Met repressor (Met regulon regulatory protein MetJ)	P0A8U6	10	100	104	99	2.32	76	10	2.32	76
METK	S-adenosylmethionine synthase (AdoMet synthase) (EC 2.5.1.6) (MAT) (Methionine adenosyltransferase)	P0A817	9	100	276	71.9	2.87	108.3	9	2.87	108.3
METN	Methionine import ATP-binding protein MetN (EC 3.6.3.-)	P30750	5	83.3	343	100	3.5	75	9	3.44	44.1
MGLB	D-galactose-binding periplasmic protein (GBP) (D-galactose/ D-glucose-binding protein) (GGBP)	P0AEE5	9	100	304	91.6	1.43	101.7	9	1.43	101.7
MGSA	Methylglyoxal synthase (MGS) (EC 4.2.3.3)	P0A731	5	100	151	99.3	2.06	299.1	5	2.06	299.1
MHPC	2-hydroxy-6-oxononadienedioate/2-hydroxy-6-oxononatrienedioate hydrolase	P77044	1	100	285	99	2.1		4	2.1	320.2
MHPD	2-keto-4-pentenoate hydratase (EC 4.2.1.80) (2-hydroxypentadienoic acid hydratase)	P77608	2	100	261	97	2.85		12	2.84	321.2
MIAA	tRNA dimethylallyltransferase (EC 2.5.1.75) (Dimethylallyl diphosphate:tRNA dimethylallyltransferase) (DMAPP:tRNA dimethylallyltransferase) (DMATase) (Isopentenyl-diphosphate:tRNA isopentenyltransferase) (IPP transferase) (IPPT) (IPTase)	P16384	3	100	303	95.9	2.6	471.6	6	2.6	256.8
MIND	Septum site-determining protein MinD (Cell division inhibitor MinD)	P0AEZ3	2	66.7	257	95.2	2.47		4	2.47	381.8
MLAC	Intermembrane phospholipid transport system binding protein MlaC	P0ADV7	2	100	184	87.2	1.87		4	1.87	101.1
MLAD	Probable phospholipid ABC transporter-binding protein MlaD	P64605	2	100	82	44.8	2.5		9	2.38	144.1
MLC	Protein mlc	P50456	2	100	304	74.9	2.78		5	2.73	63.9
MLTA	Membrane-bound lytic murein transglycosylase A (EC 4.2.2.n1) (Mlt38) (Murein hydrolase A)	P0A935	5	100	333	91.2	2.29	82.1	5	2.29	82.1
MLTB	Membrane-bound lytic murein transglycosylase B (EC 4.2.2.n1) (35 kDa soluble lytic transglycosylase) (Murein hydrolase B) (Slt35)	P41052	8	100	253	70.1	2.06	259	8	2.06	259
MLTC	Membrane-bound lytic murein transglycosylase C (EC 4.2.2.n1) (Murein lyase C)	P0C066	4	100	327	91.1	2.46	156	4	2.46	156
MNMA	tRNA-specific 2-thiouridylase MnmA	P25745	2	66.7	364	98.9	3.4		3	3.4	667.9
MNMC	tRNA 5-methylaminomethyl-2-thiouridine biosynthesis bifunctional protein MnmC (tRNA mnm(5)s(2)U biosynthesis bifunctional protein) [Includes: tRNA (mnm(5)s(2)U34)-methyltransferase (EC 2.1.1.61); FAD-dependent cmnm(5)s(2)U34 oxidoreductase (EC 1.5.-.-)]	P77182	1	100	628	94	3		6	3	183.3
MNME	tRNA modification GTPase MnmE (EC 3.6.-.-)	P25522	3	100	159	35	1.85	298.8	10	1.85	123
MOAB	Molybdenum cofactor biosynthesis protein B	P0AEZ9	2	100	168	98.8	1.85		4	1.85	224
MOAC	Cyclic pyranopterin monophosphate synthase (EC 4.6.1.17) (Molybdenum cofactor biosynthesis protein C)	P0A738	4	100	124	77	2.37	150.8	4	2.37	150.8
MOAD	Molybdopterin synthase sulfur carrier subunit (MPT synthase subunit 1) (Molybdenum cofactor biosynthesis protein D) (Molybdopterin-converting factor small subunit) (Molybdopterin-converting factor subunit 1) (Sulfur carrier protein MoaD)	P30748	7	100	80	98.8	2.02	59.5	7	2.02	59.5
MOAE	Molybdopterin synthase catalytic subunit (EC 2.8.1.12) (MPT synthase subunit 2) (Molybdenum cofactor biosynthesis protein E) (Molybdopterin-converting factor large subunit) (Molybdopterin-converting factor subunit 2)	P30749	5	100	94	62.7	1.92	76.5	5	1.92	76.5
MOBA	Molybdenum cofactor guanylyltransferase (MoCo guanylyltransferase) (EC 2.7.7.77) (GTP:molybdopterin guanylyltransferase) (Mo-MPT guanylyltransferase) (Molybdopterin guanylyltransferase) (Molybdopterin-guanine dinucleotide biosynthesis protein A) (Molybdopterin-guanine dinucleotide synthase) (MGD synthase) (Protein FA)	P32173	8	100	168	86.6	1.68	186.5	8	1.68	186.5
MOBB	Molybdopterin-guanine dinucleotide biosynthesis adapter protein	P32125	2	100	116	66.3	2.35		4	2.35	98.4
MODA	Molybdate-binding periplasmic protein	P37329	5	100	231	89.9	1.73	204.4	8	1.76	136.8
MODE	Transcriptional regulator ModE	P0A9G8	5	100	138	52.7	2.06	82.9	5	2.06	82.9
MOEA	Molybdopterin molybdenumtransferase (MPT Mo-transferase) (EC 2.10.1.1)	P12281	14	100	402	97.8	2.56	107.3	14	2.56	107.3
MOEB	Molybdopterin-synthase adenylyltransferase (EC 2.7.7.80) (MoaD protein adenylase) (Molybdopterin-converting factor subunit 1 adenylase) (Sulfur carrier protein MoaD adenylyltransferase)	P12282	3	100	165	66.3	2.23	130.4	3	2.23	130.4
MPHA	Macrolide 2'-phosphotransferase	Q47396	6	85.7	300	99.7	1.49	220.6	6	1.49	220.6
MPHB	Macrolide 2'-phosphotransferase II	O32553	7	77.8	295	97.7	1.54	99.8	7	1.54	99.8
MPPA	Periplasmic murein peptide-binding protein	P77348	2	100	509	94.8	1.79		3	1.69	166.7
MQSA	Antitoxin MqsA	Q46864	2	40	131	100	2.13		4	2.13	77.1
MRCB	Penicillin-binding protein 1B (PBP-1b) (PBP1b) (Murein polymerase) [Includes: Penicillin-insensitive transglycosylase (EC 2.4.1.129) (Peptidoglycan TGase) (Peptidoglycan glycosyltransferase); Penicillin-sensitive transpeptidase (EC 3.4.16.4) (DD-transpeptidase)]	P02919	7	100	368	43.6	2.56	164.7	7	2.56	164.7
MRDA	Peptidoglycan D,D-transpeptidase MrdA	P0AD65/P0AD67	3	100	493	77.9	2.15	470.6	3	2.15	470.6
MSBA	Lipid A export ATP-binding/permease protein MsbA	P60752/P60753	3	100	570	97.9	3.71	84.4	6	4.51	90.6
MSCS	Small-conductance mechanosensitive channel	P0C0S1	6	85.7	254	88.8	4.01	119	6	4.01	119
MSRA	Peptide methionine sulfoxide reductase MsrA	P0A744	1	100	185	87.3	1.9		3	1.9	394.3
MSRP	Protein-methionine-sulfoxide reductase catalytic subunit MsrP (EC 1.8.5.-)	P76342	2	100	238	71.3	2.38		15	2.32	235.8
MTNN	5'-methylthioadenosine/S-adenosylhomocysteine nucleosidase (MTA/SAH nucleosidase) (MTAN) (EC 3.2.2.9) (5'-methylthioadenosine nucleosidase) (MTA nucleosidase) (P46) (S-adenosylhomocysteine nucleosidase) (AdoHcy nucleosidase) (SAH nucleosidase) (SRH nucleosidase)	P0AF12/P0AF14/A7ZHQ1	11	91.7	231	99.6	1.98	118.3	11	1.98	118.3
MUG	G/U mismatch-specific DNA glycosylase (EC 3.2.2.28) (Double-strand-specific uracil glycosylase) (Mismatch-specific uracil DNA-glycosylase) (MUG)	P0A9H1	3	75	165	98.2	2.33	277.9	3	2.33	277.9
MUKE	Chromosome partition protein MukE	P22524	2	100	204	87.2	3.25		3	3.37	240.2
MUKF	Chromosome partition protein MukF (Protein KicB)	P60293	2	66.7	259	58.9	3.25		4	3.25	127.3
MURA	UDP-N-acetylglucosamine 1-carboxyvinyltransferase (EC 2.5.1.7) (Enoylpyruvate transferase) (UDP-N-acetylglucosamine enolpyruvyl transferase) (EPT)	P0A749	7	100	418	99.8	2.15	145.3	7	2.15	145.3
MURB	UDP-N-acetylenolpyruvoylglucosamine reductase (EC 1.3.1.98) (UDP-N-acetylmuramate dehydrogenase)	P08373	5	100	340	99.4	2.28	115.4	5	2.28	115.4
MURD	UDP-N-acetylmuramoylalanine--D-glutamate ligase (EC 6.3.2.9) (D-glutamic acid-adding enzyme) (UDP-N-acetylmuramoyl-L-alanyl-D-glutamate synthetase)	P14900	20	90.9	219	50	1.78	174.5	20	1.78	174.5
MURG	UDP-N-acetylglucosamine--N-acetylmuramyl-(pentapeptide) pyrophosphoryl-undecaprenol N-acetylglucosamine transferase (EC 2.4.1.227) (Undecaprenyl-PP-MurNAc-pentapeptide-UDPGlcNAc GlcNAc transferase)	P17443	2	100	350	98.6	2.2		4	2.2	138
MUTH	DNA mismatch repair protein MutH	P06722	2	100	115	50.2	2		3	2.1	113.1
MUTL	DNA mismatch repair protein MutL	P23367	4	40	305	49.6	2.08	257.7	4	2.08	257.7
MUTM	Formamidopyrimidine-DNA glycosylase	P05523	1	100	216	80.3	2.1		4	2.1	299.6
MUTS	DNA mismatch repair protein MutS	P23909	16	100	531	62.3	3.27	74	16	3.27	74
MUTT	8-oxo-dGTP diphosphatase (8-oxo-dGTPase) (EC 3.6.1.55) (7,8-dihydro-8-oxoguanine-triphosphatase) (Mutator protein MutT) (dGTP pyrophosphohydrolase)	P08337	4	100	99	76.7	2.08	119.6	4	2.08	119.6
MUTY	Adenine DNA glycosylase (EC 3.2.2.-) (A/G-specific adenine glycosylase)	P17802	12	92.3	224	64	1.54	120.7	12	1.54	120.7
NADD	Nicotinate-nucleotide adenylyltransferase (EC 2.7.7.18) (Deamido-NAD(+) diphosphorylase) (Deamido-NAD(+) pyrophosphorylase) (Nicotinate mononucleotide adenylyltransferase) (NaMN adenylyltransferase)	P0A752	2	100	212	99.5	1.95		6	1.95	99.2
NAGA	N-acetylglucosamine-6-phosphate deacetylase	P0AF18	2	50	382	100	2.15		3	2.13	463.3
NAGB	Glucosamine-6-phosphate deaminase (EC 3.5.99.6) (GlcN6P deaminase) (GNPDA) (Glucosamine-6-phosphate isomerase)	P0A759	10	90.9	266	100	2.16	146	10	2.16	146
NANA	N-acetylneuraminate lyase (NAL) (Neu5Ac lyase) (EC 4.1.3.3) (N-acetylneuraminate pyruvate-lyase) (N-acetylneuraminic acid aldolase) (NALase) (Sialate lyase) (Sialic acid aldolase) (Sialic acid lyase)	P0A6L4	22	100	291	98	1.95	156.2	22	1.95	156.2
NARG	Respiratory nitrate reductase 1 alpha chain (EC 1.7.99.4) (Nitrate reductase A subunit alpha) (Quinol-nitrate oxidoreductase subunit alpha)	P09152	10	90.9	1189	95.3	2.17	391.8	10	2.17	391.8
NARH	Respiratory nitrate reductase 1 beta chain (EC 1.7.99.4) (Nitrate reductase A subunit beta) (Quinol-nitrate oxidoreductase subunit beta)	P11349	11	100	465	90.8	2.23	324.8	11	2.23	324.8
NARI	Respiratory nitrate reductase 1 gamma chain (EC 1.7.99.4) (Cytochrome B-NR) (Nitrate reductase A subunit gamma) (Quinol-nitrate oxidoreductase subunit gamma)	P11350	10	100	145	64.4	2.25	284.1	10	2.25	284.1
NARK	Nitrate/nitrite transporter NarK	P10903	3	60	225	48.6	2.38	310.2	4	2.39	226.8
NARL	Nitrate/nitrite response regulator protein NarL	P0AF28	2	40	138	63.9	2.3		3	2.27	282.6
NARQ	Nitrate/nitrite sensor protein NarQ (EC 2.7.13.3)	P27896	4	100	190	33.6	2.24	109	5	2.28	98.6
NARU	Nitrate/nitrite transporter NarU	P37758	2	100	224	48.5	3.06		4	3.06	136
NARX	Nitrate/nitrite sensor protein NarX	P0AFA2	2	100	99	16.6	1.7		6	1.7	101.2
NDK	Nucleoside diphosphate kinase (NDK) (NDP kinase) (EC 2.7.4.6) (Nucleoside-2-P kinase)	P0A763	1	100	142	99.3	1.62		6	1.62	200.4
NEI	Endonuclease 8 (DNA glycosylase/AP lyase Nei) (EC 3.2.2.-) (EC 4.2.99.18) (DNA-(apurinic or apyrimidinic site) lyase Nei) (Endonuclease VIII)	P50465	7	77.8	212	80.6	1.8	91.1	8	1.9	81.5
NEUO	Polysialic acid O-acetyltransferase	A1ADJ6	1	100	216	70.4	1.7		3	1.7	572.6
NFO	Endonuclease 4 (EC 3.1.21.2) (Endodeoxyribonuclease IV) (Endonuclease IV)	P0A6C1	6	100	279	97.9	1.58	257.7	6	1.58	257.7
NFSB	Oxygen-insensitive NAD(P)H nitroreductase (EC 1.-.-.-) (Dihydropteridine reductase) (EC 1.5.1.34) (FMN-dependent nitroreductase)	P38489	14	100	216	99.5	2.1	182.8	19	2.07	169.8
NHAA	Na(+)/H(+) antiporter NhaA (Sodium/proton antiporter NhaA)	P13738	3	100	374	96.4	3.55	133.4	6	3.55	117
NIKA	Nickel-binding periplasmic protein	P33590	26	100	496	94.7	1.96	107.7	29	1.95	102.1
NIKR	Nickel-responsive regulator	P0A6Z6	6	75	81	60.9	2.13	83.6	6	2.13	83.6
NLEE	T3SS secreted effector NleE	Q7DBA6	1	100	126	56.3	2.31		3	2.31	270.8
NLEF	Effector protein NleF	Q8XAL7	1	100	164	86.8	3.49		7	3.49	236.7
NLEH1_2(ECS1814)	T3SS secreted effector NleH	Q8XAL6	2	100	162	53.5	2.44		8	2.44	137.1
NLPE	Lipoprotein NlpE	P40710	2	100	167	70.8	2.7		4	2.7	71.8
NLPI	Lipoprotein NlpI	P0AFB1	5	100	236	80.3	2.53	174.4	9	2.49	162.8
NORV	Anaerobic nitric oxide reductase flavorubredoxin (FlRd) (FlavoRb)	Q46877	4	100	398	83.1	2.05	364.7	5	2.02	351.4
NPMA	16S rRNA (adenine(1408)-N(1))-methyltransferase	A8C927	6	100	140	63.9	2.38	127.5	6	2.38	127.5
NRDA	Ribonucleoside-diphosphate reductase 1 subunit alpha (EC 1.17.4.1) (Protein B1) (Ribonucleoside-diphosphate reductase 1 R1 subunit) (Ribonucleotide reductase 1)	P00452	17	68	727	95.5	3.29	101.8	17	3.29	101.8
NRDB	Ribonucleoside-diphosphate reductase 1 subunit beta (EC 1.17.4.1) (Protein B2) (Protein R2) (Ribonucleotide reductase 1)	P69924	31	64.6	339	90.2	2.47	119.2	31	2.47	119.2
NRDB_2	Ribonucleoside-diphosphate reductase 1 subunit beta	P69925/A0A0E1LZC3	5	100	346	92	2.18	497.8	5	2.18	497.8
NRDF	Ribonucleoside-diphosphate reductase 2 subunit beta (EC 1.17.4.1) (R2F protein) (Ribonucleotide reductase 2)	P37146	6	100	281	88.1	2.07	205.8	9	2.14	179.1
NRDI	Protein NrdI	P0A772	3	100	128	94.1	2.28	272.6	6	2.28	149.2
NRFA	Cytochrome c-552 (EC 1.7.2.2) (Ammonia-forming cytochrome c nitrite reductase) (Cytochrome c nitrite reductase)	P0ABK9	6	100	440	92.1	2.12	292.8	6	2.12	292.8
NUDB	Dihydroneopterin triphosphate diphosphatase (EC 3.6.1.67) (Dihydroneopterin triphosphate pyrophosphatase) (dATP pyrophosphohydrolase)	P0AFC0	5	100	141	94	2.03	188.5	11	2.12	100.9
NUDC	NADH pyrophosphatase (EC 3.6.1.22)	P32664	5	100	243	94.6	2.43	88.5	8	2.43	84.2
NUDE	ADP compounds hydrolase NudE	P45799	2	100	184	98.9	2.51		4	2.51	294.9
NUDF	ADP-ribose pyrophosphatase (EC 3.6.1.13) (ADP-ribose diphosphatase) (ADP-ribose phosphohydrolase) (ASPPase) (Adenosine diphosphoribose pyrophosphatase) (ADPR-PPase)	Q93K97	5	100	153	73.2	2.27	156.1	6	2.29	135.6
NUDJ	Phosphatase NudJ (EC 3.6.1.-)	P0AEI6(G7RNP0)/A1AA28	4	100	150	98	2.57	208.8	24	2.53	95
NUDK	GDP-mannose pyrophosphatase NudK (EC 3.6.1.-)	P37128	5	100	103	53.9	2.3	146.9	5	2.3	146.9
NUSA	Transcription termination/antitermination protein NusA	P0AFF6/P0AFF8	2	66.7	319	64.4	2.75		3	2.95	91.6
NUSB	N utilization substance protein B (Protein NusB)	P0A780/B7MD74	4	100	132	95	2.44	41.9	9	2.59	35.9
OMPC	Membrane protein	Q9K597	4	100	343	94.2	2.78	280.4	4	2.78	280.4
OMPF	Outer membrane protein F (Outer membrane protein 1A) (Outer membrane protein B) (Outer membrane protein IA) (Porin OmpF)	P02931	31	96.9	313	86.5	2.73	143.1	31	2.73	143.1
OMPG	Outer membrane protein G	P76045	3	50	277	92	2.39	163.4	7	2.4	155.2
OMPW	Outer membrane protein W	P0A915	2	100	163	76.9	2.85		6	2.85	430.7
OPPA	Periplasmic oligopeptide-binding protein	P23843	3	100	517	95.2	1.99	174.3	9	2	131.9
ORN	Oligoribonuclease (EC 3.1.-.-)	P0A784	2	100	179	98.9	1.95		6	2.03	149.2
OSMC	Peroxiredoxin OsmC (EC 1.11.1.15) (Osmotically-inducible protein C)	P0C0L2	2	100	142	99.3	2.1		8	2.1	179.8
OTSA	Trehalose-6-phosphate synthase (TPS) (EC 2.4.1.15) (Alpha,alpha-trehalose-phosphate synthase [UDP-forming]) (Osmoregulatory trehalose synthesis protein A) (OtsA) (UDP-glucose-glucosephosphate glucosyltransferase)	P31677	4	100	438	92.4	2.16	239.4	7	2.21	167.1
OXC	Oxalyl-CoA decarboxylase (EC 4.1.1.8)	P0AFI0	3	100	545	96.6	1.89	889.3	6	1.89	509.6
(P00383)	Dihydrofolate reductase type 2	P00383	9	90	57	73.1	1.41	244.8	9	1.41	244.8
PAAA	1,2-phenylacetyl-CoA epoxidase, subunit A (EC 1.14.13.149) (1,2-phenylacetyl-CoA epoxidase, catalytic subunit alpha) (1,2-phenylacetyl-CoA monooxygenase, subunit A)	P76077	6	85.7	301	97.4	2.38	253.4	7	2.47	240.9
PAAC	1,2-phenylacetyl-CoA epoxidase, subunit C (1,2-phenylacetyl-CoA epoxidase, structural subunit beta) (1,2-phenylacetyl-CoA monooxygenase, subunit C)	P76079	8	100	242	97.6	2.37	207.4	11	2.42	178.2
PAAH	3-hydroxyadipyl-CoA dehydrogenase	P76083	1	100	470	98.9	2.2		3	2.2	296.5
PAAI	Acyl-coenzyme A thioesterase PaaI	P76084	2	100	130	92.9	2.1		4	2.1	121.4
PABB	Aminodeoxychorismate synthase component 1	P05041	2	100	269	59.4	2.03		4	2.03	168.5
PAC	Penicillin G acylase	P06875	24	100	557	65.8	2.12	154.8	24	2.12	154.8
PAL	Peptidoglycan-associated lipoprotein	P0A912	3	100	106	61.3	1.76	235.1	7	1.72	148.4
PANB	3-methyl-2-oxobutanoate hydroxymethyltransferase (EC 2.1.2.11) (Ketopantoate hydroxymethyltransferase) (KPHMT)	P31057	1	100	262	99.2	1.8		4	1.8	413.3
PAND	Aspartate 1-decarboxylase (EC 4.1.1.11) (Aspartate alpha-decarboxylase) [Cleaved into: Aspartate 1-decarboxylase beta chain; Aspartate 1-decarboxylase alpha chain]	P0A790	8	47.1	115	91.3	1.81	123	8	1.81	123
PANE	2-dehydropantoate 2-reductase (EC 1.1.1.169) (Ketopantoate reductase) (KPA reductase) (KPR)	P0A9J4	4	100	291	96	2.01	127.9	4	2.01	127.9
PANZ	PanD regulatory factor	P37613	4	100	127	100	1.64	345.5	4	1.64	345.5
PAPD	Periplasmid chaperone PapD protein	Q1R2W9/Q7ATU9	5	83.3	215	90	2.38	159.3	5	2.38	159.3
PAPD_2	Chaperone protein PapD	P15319	7	70	215	90	2.48	98.9	8	2.45	98.8
PAPH	PAP fimbrial minor pilin protein	P07111	3	100	114	58.5	2.23	461.4	3	2.23	461.4
PARA	Plasmid partition protein A	P07620	2	66.7	363	91.2	2.32		4	2.32	211.2
PARF	Chromosome partitioning protein ParA	B0ZE06	4	100	126	61.2	2.54	110.3	4	2.54	110.3
PARM	Plasmid segregation protein ParM	P11904	4	66.7	318	99.4	2.16	82.4	7	2.14	78.2
PATA	Putrescine aminotransferase (EC 2.6.1.82) (Putrescine--2-oxoglutaric acid transaminase) (PAT) (PATase)	P42588	4	100	445	96.9	2.59	279.5	7	2.47	232.6
PCKA	Phosphoenolpyruvate carboxykinase (ATP) (PCK) (PEP carboxykinase) (PEPCK) (EC 4.1.1.49)	P22259	10	50	531	98.3	1.81	161.7	12	1.74	146
PCM	Protein-L-isoaspartate O-methyltransferase	P0A7A5	1	100	207	99.5	1.8		3	1.8	273.5
PCNB	Poly(A) polymerase I (PAP I) (EC 2.7.7.19) (Plasmid copy number protein)	P0ABF1(C9QS13)	4	100	290	62.4	3.28	203.8	7	3.22	161.3
PCOC	Copper resistance protein C	Q47454	2	100	102	81	1.53		3	1.53	172
PDHR	Pyruvate dehydrogenase complex repressor	P0ACM0	1	50	137	53.9	2.8		4	2.8	791.7
PDXA	4-hydroxythreonine-4-phosphate dehydrogenase (EC 1.1.1.262) (4-(phosphohydroxy)-L-threonine dehydrogenase)	P19624	3	100	328	99.7	2.23	351.5	6	2.23	137.2
PDXH	Pyridoxine/pyridoxamine 5'-phosphate oxidase (EC 1.4.3.5) (PNP/PMP oxidase) (PNPOx) (Pyridoxal 5'-phosphate synthase)	P0AFI7	6	85.7	199	91.3	2.06	246.7	6	2.06	246.7
PDXJ	Pyridoxine 5'-phosphate synthase (PNP synthase) (EC 2.6.99.2)	P0A794	7	100	140	57.6	2.21	237.9	7	2.21	237.9
PDXK	Pyridoxine/pyridoxal/pyridoxamine kinase (PN/PL/PM kinase) (EC 2.7.1.35) (B6-vitamer kinase) (Pyridoxal kinase 1) (PL kinase 1)	P40191	3	100	187	66.1	2.63	229.2	3	2.63	229.2
PDXY	Pyridoxal kinase PdxY (PL kinase) (EC 2.7.1.35) (Pyridoxal kinase 2) (PL kinase 2)	P77150	2	100	286	99.7	2.09		6	2.05	160.5
PEPA	Cytosol aminopeptidase (EC 3.4.11.1) (Aminopeptidase A/I) (Leucine aminopeptidase) (LAP) (EC 3.4.11.10) (Leucyl aminopeptidase)	P68767	1	100	503	100	2.5		12	2.5	297.8
PEPB	Peptidase B	P37095/(A0A387CSU7)	2	100	425	99.5	2.33		18	2.24	288.5
PEPN	Aminopeptidase N (EC 3.4.11.2) (Alpha-aminoacylpeptide hydrolase)	P04825	35	94.6	865	99.4	2.03	378.8	35	2.03	378.8
PEPP	Xaa-Pro aminopeptidase (EC 3.4.11.9) (Aminoacylproline aminopeptidase) (Aminopeptidase P II) (APP-II) (X-Pro aminopeptidase)	P15034	25	96.2	439	99.5	2.19	312.7	25	2.19	312.7
PFKA	ATP-dependent 6-phosphofructokinase isozyme 1	P0A796	2	100	301	94.1	2.4		6	2.4	172
PFKB	ATP-dependent 6-phosphofructokinase isozyme 2 (ATP-PFK 2) (Phosphofructokinase 2) (EC 2.7.1.11) (6-phosphofructokinase isozyme II) (Phosphohexokinase 2)	P06999	6	100	290	93.9	1.98	108.2	6	1.98	108.2
PFLB	Formate acetyltransferase 1 (EC 2.3.1.54) (Pyruvate formate-lyase 1)	P09373	8	100	611	80.4	2.36	228.8	8	2.36	228.8
PGAB	Poly-beta-1,6-N-acetyl-D-glucosamine N-deacetylase (PGA N-deacetylase) (Poly-beta-1,6-GlcNAc N-deacetylase) (EC 3.5.1.-)	P75906	6	75	300	44.6	1.86	178.5	6	1.86	178.5
PGI	Glucose-6-phosphate isomerase (GPI) (EC 5.3.1.9) (Phosphoglucose isomerase) (PGI) (Phosphohexose isomerase) (PHI)	P0A6T1	1	100	549	100	2.05		5	2.05	398.2
PHND	PhnD, subunit of alkylphosphonate ABC transporter	Q1R3F7	4	100	268	79.3	2.4	82.4	6	2.37	73
PHNH	Alpha-D-ribose 1-methylphosphonate 5-triphosphate synthase subunit PhnH	P16686	2	100	99	51	1.7		3	1.7	205
PHNP	Phosphoribosyl 1,2-cyclic phosphate phosphodiesterase (EC 3.1.4.55) (Phosphoribosyl cyclic phosphodiesterase)	P16692	2	100	249	98.8	1.44		4	1.44	419.8
PHOA	Alkaline phosphatase (APase) (EC 3.1.3.1)	P00634	42	93.3	440	93.4	2.24	175.4	42	2.24	175.4
PHOB	Phosphate regulon transcriptional regulatory protein PhoB	P0AFJ5	5	62.5	121	52.8	1.8	63.1	5	1.8	63.1
PHOP	Transcriptional regulatory protein PhoP	P23836	2	100	119	53.4	2.22		3	2.33	149.4
PHP	Phosphotriesterase homology protein	P45548	2	100	290	99.3	1.77		8	1.81	250.9
PLDA	Phospholipase A1 (EC 3.1.1.32) (EC 3.1.1.4) (Detergent-resistant phospholipase A) (DR-phospholipase A) (Outer membrane phospholipase A) (OM PLA) (OMPLA) (Phosphatidylcholine 1-acylhydrolase)	P0A921	7	100	239	82.7	2.56	163.3	7	2.56	163.3
PLIG	Inhibitor of g-type lysozyme	P76002	3	100	111	83.5	1.33	229.9	4	1.45	190.6
PMBA	Metalloprotease PmbA (EC 3.4.-.-) (Protein TldE)	P0AFK0	6	100	443	98.4	1.47	196.3	6	1.47	196.3
PNP	Polyribonucleotide nucleotidyltransferase	P05055/A7ZS61	2	33.3	544	76.5	3.04		11	3.38	157.9
PNTA	NAD(P) transhydrogenase subunit alpha	P07001	3	100	213	41.8	1.96	755.4	6	1.96	267.4
POLA	DNA polymerase I (POL I) (EC 2.7.7.7)	P00582	13	92.9	309	33.3	2.47	124.2	13	2.47	124.2
POLB	DNA polymerase II (Pol II) (EC 2.7.7.7)	P21189	6	66.7	459	58.6	2.2	242.7	6	2.2	242.7
POTD	Spermidine/putrescine-binding periplasmic protein (SPBP)	P0AFK9	2	100	322	99.7	2.15		5	2.36	168.5
POTF	Putrescine-binding periplasmic protein	P31133	2	100	341	92.2	1.95		5	2.1	245.7
POXB	Pyruvate dehydrogenase [ubiquinone] (EC 1.2.5.1) (Pyruvate oxidase) (POX) [Cleaved into: Alpha-peptide]	P07003	2	100	463	80.9	2.7		6	2.63	678.2
PPA	Inorganic pyrophosphatase (EC 3.6.1.1) (Pyrophosphate phospho-hydrolase) (PPase)	P0A7A9	18	94.7	173	98.3	1.82	98.5	18	1.82	98.5
PPC	Phosphoenolpyruvate carboxylase (PEPC) (PEPCase) (EC 4.1.1.31)	P00864	3	100	697	78.9	2.58	794.8	3	2.58	794.8
PPIA	Peptidyl-prolyl cis-trans isomerase A (PPIase A) (EC 5.2.1.8) (Cyclophilin A) (Rotamase A)	P0AFL3	3	100	166	87.4	1.77	285.3	5	1.76	202.5
PPK	Polyphosphate kinase	P0A7B1	2	100	687	99.9	2.75		4	2.75	403.1
PPNN	Pyrimidine/purine nucleotide 5'-monophosphate nucleosidase	P0ADR8	2	100	316	69.6	2.63		3	2.58	147.7
PPTA	Tautomerase PptA (EC 5.3.2.-)	P31992	3	100	76	98.7	1.6	316	6	1.6	174.9
PPX	Exopolyphosphatase (ExopolyPase) (EC 3.6.1.11) (Metaphosphatase)	P0AFL6/P0AFL8	2	100	495	96.5	2.05		6	2.1	161.9
PRC	Tail-specific protease	P23865	3	60	425	62.3	2.84	90.3	3	2.84	90.3
PRFA	Peptide chain release factor RF1 (RF-1)	P0A7I0(A7ZKY5, B7MKB3)	4	57.1	251	69.7	3.19	123.2	8	3.19	107.3
PRFB	Peptide chain release factor RF2 (RF-2)	P07012	3	100	357	97.8	2.74	65.3	5	2.92	46.3
PRFC	Peptide chain release factor RF3	P0A7I4/B1XFI4	4	100	281	53.1	3.38	98.4	4	3.38	98.4
PRIA	Primosomal protein N' (EC 3.6.4.-) (ATP-dependent helicase PriA) (Replication factor Y)	P17888	6	85.7	103	14.1	3.08	116.8	6	3.08	116.8
PRIB	Primosomal replication protein N	P07013	6	100	79	76	2.17	106.6	6	2.17	106.6
PROB	Glutamate 5-kinase	P0A7B5	1	33.3	199	54.2	2.9		7	2.9	186.4
PRPB	2-methylisocitrate lyase (2-MIC) (MICL) (EC 4.1.3.30) ((2R,3S)-2-methylisocitrate lyase)	P77541	4	100	286	96.6	1.83	292	8	1.83	236.1
PRPR	Propionate catabolism operon regulatory protein	P77743	1	100	186	35.2	2.1		3	2.1	115.9
PRR	Gamma-aminobutyraldehyde dehydrogenase (EC 1.2.1.19) (1-pyrroline dehydrogenase) (4-aminobutanal dehydrogenase) (ABALDH)	P77674	2	100	474	100	2.15		8	2.15	445.6
PRS	Ribose-phosphate pyrophosphokinase	P0A717/P0A719	2	100	193	61.3	2.46		4	2.34	191
PSIB	Protein PsiB	P10031	1	100	137	95.1	2.2		4	2.2	317.4
PSPF	Psp operon transcriptional activator (Phage shock protein F)	P37344	9	90	164	50.5	1.88	175.8	9	1.88	175.8
PSTS	Phosphate-binding protein PstS (PBP)	P0AG82	13	100	321	92.8	1.76	108.8	13	1.76	108.8
PSUG	Pseudouridine-5'-phosphate glycosidase (PsiMP glycosidase) (EC 4.2.1.70)	P33025	4	100	277	88.8	2.12	259.1	7	2.14	199.2
PTH	Peptidyl-tRNA hydrolase	P0A7D1/D6J9H8	3	100	190	97.9	2.27	145	6	2.6	133.1
PTSH	Phosphocarrier protein HPr (EC 2.7.11.-) (Histidine-containing protein)	P0AA04	9	90	83	97.6	2.14	80.8	9	2.14	80.8
PURA	Adenylosuccinate synthetase (AMPSase) (AdSS) (EC 6.3.4.4) (IMP--aspartate ligase)	P0A7D4	24	100	431	99.8	2.44	79	24	2.44	79
PURB	Adenylosuccinate lyase (ASL) (EC 4.3.2.2) (Adenylosuccinase) (ASase)	P0AB89/Q8X737	3	75	407	89.3	1.92	596.8	4	1.94	495.9
PURC	Phosphoribosylaminoimidazole-succinocarboxamide synthase	P0A7D7	2	100	237	100	2.03		4	2.03	298.8
PURE	N5-carboxyaminoimidazole ribonucleotide mutase (N5-CAIR mutase) (EC 5.4.99.18) (5-(carboxyamino)imidazole ribonucleotide mutase)	P0AG18	6	100	160	94.7	1.99	229.7	6	1.99	229.7
PURF	Amidophosphoribosyltransferase (ATase) (EC 2.4.2.14) (Glutamine phosphoribosylpyrophosphate amidotransferase) (GPATase)	P0AG16	5	100	482	95.4	2.38	145	5	2.38	145
PURK	N5-carboxyaminoimidazole ribonucleotide synthase (N5-CAIR synthase) (EC 6.3.4.18) (5-(carboxyamino)imidazole ribonucleotide synthetase)	P09029	4	100	226	63.7	1.95	199.3	7	1.93	168.3
PURM	Phosphoribosylformylglycinamidine cyclo-ligase	P08178	1	100	325	94.2	2.5		4	2.5	191.3
PURN	Phosphoribosylglycinamide formyltransferase (EC 2.1.2.2) (5'-phosphoribosylglycinamide transformylase) (GAR transformylase) (GART)	P08179	5	55.6	209	98.6	2.04	146.8	5	2.04	146.8
PURR	HTH-type transcriptional repressor PurR (Pur regulon repressor) (Purine nucleotide synthesis repressor)	P0ACP7	22	91.7	338	99.1	2.75	227.8	22	2.75	227.8
PURT	Formate-dependent phosphoribosylglycinamide formyltransferase	P33221	6	85.7	183	46.7	1.68	208.3	10	1.68	144.4
PUTA	Bifunctional protein PutA [Includes: Proline dehydrogenase (EC 1.5.5.2) (Proline oxidase); Delta-1-pyrroline-5-carboxylate dehydrogenase (P5C dehydrogenase) (EC 1.2.1.88) (L-glutamate gamma-semialdehyde dehydrogenase)]	P09546	12	75	367	27.8	1.98	358.5	12	1.98	358.5
PYKF	Pyruvate kinase I (EC 2.7.1.40) (PK-1)	P0AD61(P0AD62)	4	100	279	59.4	2.35	163.5	8	2.35	116
PYRB	Aspartate carbamoyltransferase catalytic subunit (EC 2.1.3.2) (Aspartate transcarbamylase) (ATCase)	P0A786	55	96.5	307	98.7	2.49	73.9	55	2.49	73.9
(PYRB)	Aspartate carbamoyltransferase catalytic subunit (EC 2.1.3.2) (Aspartate transcarbamylase) (ATCase)	(E8Y328)	7	100	307	98.7	2.17	41.7	13	2.18	36.4
PYRC	Dihydroorotase (DHOase) (EC 3.5.2.3)	P05020	14	87.5	343	98.6	1.9	366.6	17	1.91	291.4
PYRD	Dihydroorotate dehydrogenase (quinone)	P0A7E1	1	100	336	100	2.5		4	2.5	463.6
PYRF	Orotidine 5'-phosphate decarboxylase (EC 4.1.1.23) (OMP decarboxylase) (OMPDCase) (OMPdecase)	P08244	3	100	183	74.7	2.67	182.6	6	2.67	140.8
PYRG	CTP synthase (EC 6.3.4.2) (Cytidine 5'-triphosphate synthase) (Cytidine triphosphate synthetase) (CTP synthetase) (CTPS) (UTP--ammonia ligase)	P0A7E5	3	100	427	78.3	2.6	317.4	6	2.6	199.1
PYRH	Uridylate kinase (UK) (EC 2.7.4.22) (Uridine monophosphate kinase) (UMP kinase) (UMPK)	P0A7E9	3	75	215	89.2	2.57	148.5	5	2.62	121
PYRI	Aspartate carbamoyltransferase regulatory chain	P0A7F3	53	98.1	143	93.5	2.51	42.1	53	2.51	42.1
(PYRI)	Aspartate carbamoyltransferase regulatory chain	C3SF57/(E8Y329)	6	100	143	93.5	2.2	129.3	12	2.2	69.9
(Q47450)	Uncharacterized protein	Q47450	3	75	196	58.3	2.53	228.6	3	2.53	228.6
QUED	6-carboxy-5,6,7,8-tetrahydropterin synthase (CPH4 synthase) (EC 4.1.2.50) (Queuosine biosynthesis protein QueD)	P65870	4	100	118	97.5	2.14	173.7	8	1.93	160.3
RAIA	Ribosome-associated inhibitor A (Protein Y) (pY) (Ribosome associated factor Y) (Spot Y)	P0AD49	5	100	94	83.2	2.68	175.8	5	2.68	175.8
RAPA	RNA polymerase-associated protein RapA	P60240/B7MAI2	2	100	961	99.3	3.95		4	3.95	109
RAPZ	RNase adapter protein RapZ	P0A894	2	66.7	149	52.5	3.33		3	3.3	162.1
RBSB	Ribose import binding protein RbsB	P02925	7	100	271	91.6	2.1	87.1	7	2.1	87.1
RBSK	Ribokinase (RK) (EC 2.7.1.15)	P0A9J6	5	100	305	98.7	2.23	162.2	5	2.23	162.2
RCDA	HTH-type transcriptional regulator RcdA (Regulator of csgD)	P75811	1	100	152	85.4	2.55		5	2.55	99.3
RCSB	Transcriptional regulatory protein RcsB (Capsular synthesis regulator component B)	P0DMC7	3	100	131	60.6	2.84	122	4	2.98	99.2
RDGB	dITP/XTP pyrophosphatase (EC 3.6.1.66) (Deoxyribonucleoside triphosphate pyrophosphohydrolase) (Inosine triphosphate pyrophosphatase) (ITPase) (Non-canonical purine NTP pyrophosphatase) (Non-standard purine NTP pyrophosphatase) (Nucleoside-triphosphate diphosphatase) (Nucleoside-triphosphate pyrophosphatase) (NTPase)	P52061	3	100	193	98	1.82	174.6	4	1.86	130.2
RECB	RecBCD enzyme subunit RecB	P08394	2	100	870	73.7	3.35		4	3.35	494.9
RECC	RecBCD enzyme subunit RecC	P07648	2	100	1121	99.9	3.35		3	3.43	641.9
RELE	mRNA interferase RelE (EC 3.1.-.-) (Endoribonuclease RelE) (Toxin RelE)	P0C077	5	100	82	86.3	2.77	59	5	2.77	59
RELE2	Plasmid stabilization protein ParE	A0A0D7C2L1/A0A0H3JHG3	3	100	91	98.9	3.11	172.5	14	3.09	117.8
REPA	Regulatory protein RepA	P20356	3	100	179	64.2	2.3	264.2	9	2.28	162.5
RFAC	Lipopolysaccharide heptosyltransferase 1	P24173/Q1R4X0/A0A0H2VC26/A0A152KUZ3	4	100	284	89	2.25	237	6	2.29	176.5
RFAH	Transcription antitermination protein RfaH	P0AFW0	2	100	96	59.3	2.1		6	2.1	134.2
RFBA	Glucose-1-phosphate thymidylyltransferase 1 (G1P-TT 1) (EC 2.7.7.24) (dTDP-glucose pyrophosphorylase 1) (dTDP-glucose synthase 1)	P37744	3	100	290	99	2.03	403	12	2.03	133.7
RHAA	L-rhamnose isomerase (EC 5.3.1.14)	P32170	3	100	354	84.5	1.97	394.2	9	1.97	226.5
RHAB	L-Rhamnulokinase (RhaB) (RhuK) (EC 2.7.1.5) (ATP:L-rhamnulose phosphotransferase) (L-rhamnulose 1-kinase) (Rhamnulose kinase)	P32171	4	100	478	97.8	2.04	192.8	5	2.12	188.7
RHAD	Rhamnulose-1-phosphate aldolase (EC 4.1.2.19)	P32169	15	100	272	99.3	1.83	141.3	15	1.83	141.3
RHAM	L-rhamnose mutarotase	P32156	1	100	104	100	1.8		4	1.8	458
RHMA	2-keto-3-deoxy-L-rhamnonate aldolase (KDR aldolase) (EC 4.1.2.53) (2-dehydro-3-deoxyrhamnonate aldolase) (2-keto-3-deoxy acid sugar aldolase)	P76469	2	100	256	95.9	1.66		6	1.66	286.3
RHO	Transcription termination factor Rho (EC 3.6.4.-) (ATP-dependent helicase Rho)	P0AG30/P0AG32	5	35.7	324	77.3	3.05	92.3	5	3.05	92.3
RIBA	GTP cyclohydrolase-2	P0A7I7	2	100	116	59.2	2.07		3	2.25	501.9
RIBB	3,4-dihydroxy-2-butanone 4-phosphate synthase	P0A7J0	2	100	119	54.8	1.48		4	1.48	395.1
RIBC	Riboflavin synthase (RS) (EC 2.5.1.9)	P0AFU8	2	100	87	40.8	2.3		5	2.24	127.7
RIBD	Riboflavin biosynthesis protein RibD [Includes: Diaminohydroxyphosphoribosylaminopyrimidine deaminase (DRAP deaminase) (EC 3.5.4.26) (Riboflavin-specific deaminase); 5-amino-6-(5-phosphoribosylamino)uracil reductase (EC 1.1.1.193) (HTP reductase)]	P25539/Q3ZUB0	3	100	169	46	2.87	201.7	6	2.87	103.7
RIHA	Pyrimidine-specific ribonucleoside hydrolase RihA	P41409	2	100	137	44.1	1.94		5	2.04	534.2
RIHB	Pyrimidine-specific ribonucleoside hydrolase RihB (EC 3.2.2.8) (Cytidine/uridine-specific hydrolase)	P33022	3	75	308	98.4	2.07	480.4	7	1.93	303.4
RIMK	Ribosomal protein S6--L-glutamate ligase	P0C0U4	3	75	289	96.3	2.6	280.4	10	2.22	122.5
RLMB	23S rRNA (guanosine-2'-O-)-methyltransferase RlmB (EC 2.1.1.185) (23S rRNA (guanosine2251 2'-O)-methyltransferase) (23S rRNA Gm2251 2'-O-methyltransferase)	P63177	1	100	242	99.6	2.5		6	2.5	87.6
RLMD	23S rRNA (uracil(1939)-C(5))-methyltransferase RlmD	P55135	2	100	416	96.1	2.05		3	2.08	171.5
RLMH	Ribosomal RNA large subunit methyltransferase H (EC 2.1.1.177) (23S rRNA (pseudouridine1915-N3)-methyltransferase) (23S rRNA m3Psi1915 methyltransferase) (rRNA (pseudouridine-N3-)-methyltransferase RlmH)	P0A8I8	3	75	152	98.1	2.03	241.7	6	2.03	138.6
RLMJ	Ribosomal RNA large subunit methyltransferase J (EC 2.1.1.266) (23S rRNA (adenine(2030)-N6)-methyltransferase) (23S rRNA m6A2030 methyltransferase)	P37634/A0A0G3KF30	6	100	221	78.9	1.82	174.2	12	1.92	151.4
RLMM	Ribosomal RNA large subunit methyltransferase M (EC 2.1.1.186) (23S rRNA (cytidine2498-2'-O)-methyltransferase) (23S rRNA 2'-O-ribose methyltransferase RlmM)	P0ADR6	3	100	355	97	2.15	342	4	2.09	233.7
RLMN	Dual-specificity RNA methyltransferase RlmN (EC 2.1.1.192) (23S rRNA (adenine(2503)-C(2))-methyltransferase) (23S rRNA m2A2503 methyltransferase) (Ribosomal RNA large subunit methyltransferase N) (tRNA (adenine(37)-C(2))-methyltransferase) (tRNA m2A37 methyltransferase)	P36979/C9QPQ6	6	100	333	86.7	2.39	143.1	9	2.42	133.5
RLUA	Ribosomal large subunit pseudouridine synthase A	P0AA37	1	100	214	97.7	2.05		4	2.05	259.8
RLUB	Ribosomal large subunit pseudouridine synthase B	P37765	2	100	185	63.6	1.9		3	1.7	115.1
RLUC	Ribosomal large subunit pseudouridine synthase C	P0AA39	2	100	225	70.5	2.1		3	2.07	236.6
RLUD	Ribosomal large subunit pseudouridine synthase D (EC 5.4.99.23) (23S rRNA pseudouridine(1911/1915/1917) synthase) (rRNA pseudouridylate synthase D) (rRNA-uridine isomerase D)	P33643	4	100	249	76.4	1.84	160	4	1.84	160
RLUE	Ribosomal large subunit pseudouridine synthase E	P75966	2	100	121	55.8	1.4		3	1.47	165.3
RLUF	23S rRNA pseudouridine(2604) synthase (EC 5.4.99.21) (Ribosomal large subunit pseudouridine synthase F) (rRNA pseudouridylate synthase F) (rRNA-uridine isomerase F)	P32684	2	100	175	60.3	2.8		6	2.87	129.9
RMTB	16S rRNA (guanine(1405)-N(7))-methyltransferase	Q763K9	3	100	150	59.8	1.87		3	1.87	232.5
RNA	Ribonuclease I (RNase I) (EC 3.1.27.6) (Enterobacter ribonuclease)	P21338	4	100	245	91.4	1.81	193.6	4	1.81	193.6
RNB	Exoribonuclease 2 (EC 3.1.13.1) (Exoribonuclease II) (RNase II) (Ribonuclease II)	P30850	3	100	448	69.6	2.51	133.1	6	2.43	102
RNHA	Ribonuclease HI (RNase HI) (EC 3.1.26.4) (Ribonuclease H) (RNase H)	P0A7Y4	31	73.8	150	96.8	1.94	81.9	31	1.94	81.9
RNT	Ribonuclease T (EC 3.1.13.-) (Exoribonuclease T) (RNase T)	P30014	16	100	201	93.5	2.16	119.5	16	2.16	119.5
ROB	Right origin-binding protein	P0ACI0	1	100	267	92.4	2.7		4	2.7	230.4
ROXA	50S ribosomal protein L16 3-hydroxylase (EC 1.14.11.47) (Ribosomal oxygenase RoxA) (ROX)	P27431	5	100	211	56.6	2.62	154.1	6	2.62	140.9
RPIA	Ribose-5-phosphate isomerase A	P0A7Z0	2	66.7	218	99.5	2		4	2	212.3
RPIB	Ribose-5-phosphate isomerase B (EC 5.3.1.6) (Phosphoriboisomerase B)	P37351	2	100	146	98	2.15		10	2.14	200.1
RPLB	50S ribosomal protein L2 (Large ribosomal subunit protein uL2)	P60422	42	95.5	267	97.8	3.23	57.8	42	3.23	57.8
RPLC	50S ribosomal protein L3	P60438	43	84.3	209	100	3.24	60.3	43	3.24	60.3
RPLD	50S ribosomal protein L4 (Large ribosomal subunit protein uL4)	P60723	42	95.5	201	100	3.23	73.1	42	3.23	73.1
RPLE	50S ribosomal protein L5	P62399	42	95.5	177	98.9	3.23	47.1	42	3.23	47.1
RPLF	50S ribosomal protein L6 (Large ribosomal subunit protein uL6)	P0AG55	39	100	176	99.4	3.21	70	39	3.21	70
RPLI	50S ribosomal protein L9	P0A7R1	39	90.7	149	100	3.23	28	39	3.23	28
RPLJ	50S ribosomal protein L10 (50S ribosomal protein L8) (Large ribosomal subunit protein uL10)	P0A7J3	11	100	135	81.8	2.99	24	11	2.99	24
RPLK	50S ribosomal protein L11 (Large ribosomal subunit protein uL11)	P0A7J7	42	100	134	94.4	3.23	28.7	42	3.23	28.7
RPLM	50S ribosomal protein L13	P0AA10/P0AA11	40	90.9	142	100	3.22	80.9	40	3.22	80.9
RPLN	50S ribosomal protein L14	P0ADY3/P0ADY6	31	70.5	122	99.2	3.1	88.5	31	3.1	88.5
RPLO	50S ribosomal protein L15 (Large ribosomal subunit protein uL15)	P02413	42	100	143	99.3	3.23	40.6	42	3.23	40.6
RPLP	50S ribosomal protein L16	P0ADY7	43	97.7	136	100	3.24	36.1	43	3.24	36.1
RPLQ	50S ribosomal protein L17	P0AG44/P0AG46	43	97.7	120	94.5	3.24	57.9	43	3.24	57.9
RPLR	50S ribosomal protein L18	P0C018	43	97.7	116	99.1	3.24	37	43	3.24	37
RPLS	50S ribosomal protein L19 (Large ribosomal subunit protein bL19)	P0A7K6	42	100	114	99.1	3.23	29.1	42	3.23	29.1
RPLT	50S ribosomal protein L20	P0A7L3	43	97.7	117	99.2	3.24	96.9	43	3.24	96.9
RPLU	50S ribosomal protein L21	P0AG48	43	97.7	103	100	3.24	31	43	3.24	31
RPLV	50S ribosomal protein L22	P61175	43	97.7	110	100	3.24	72.9	43	3.24	72.9
RPLW	50S ribosomal protein L23	P0ADZ0	43	97.7	93	93	3.24	42.8	43	3.24	42.8
RPLX	50S ribosomal protein L24	P60624	42	97.7	102	98.1	3.23	40.1	42	3.23	40.1
RPLY	50S ribosomal protein L25 (Large ribosomal subunit protein bL25)	P68919	43	95.6	94	100	3.19	63.1	43	3.19	63.1
RPMA	50S ribosomal protein L27	P0A7L8	23	51.1	79	92.9	3.45	22.8	23	3.45	22.8
RPMB	50S ribosomal protein L28	P0A7M2	40	97.6	77	98.7	3.22	78.6	40	3.22	78.6
RPMC	50S ribosomal protein L29	P0A7M6	35	79.5	63	100	3.32	30.2	35	3.32	30.2
RPMD	50S ribosomal protein L30	P0AG51	40	97.6	58	98.3	3.23	49.3	40	3.23	49.3
RPME	50S ribosomal protein L31	P0A7M9	3	75	70	100	3.55	124	6	3.55	47.4
RPMF	50S ribosomal protein L32	P0A7N4	42	95.5	56	98.2	3.23	54.8	42	3.23	54.8
RPMG	50S ribosomal protein L33	P0A7N9	42	95.5	50	90.9	3.23	31.4	42	3.23	31.4
RPMH	50S ribosomal protein L34	P0A7P5	42	95.5	46	100	3.23	54.5	42	3.23	54.5
RPMI	50S ribosomal protein L35	P0A7Q1	42	95.5	64	98.5	3.23	41.1	42	3.23	41.1
RPMJ	50S ribosomal protein L36	P0A7Q6	42	97.7	38	100	3.23	37.1	42	3.23	37.1
RPOA	DNA-directed RNA polymerase subunit alpha (RNAP subunit alpha) (EC 2.7.7.6) (RNA polymerase subunit alpha) (Transcriptase subunit alpha)	P0A7Z4	25	75.8	217	66	4.23	80.3	25	4.23	80.3
RPOA_24	DNA-directed RNA polymerase subunit alpha	A7ZSI4	8	100	224	68.1	4.27	82.3	8	4.27	82.3
RPOA_57	DNA-directed RNA polymerase subunit alpha	P0A7Z6	8	88.9	222	67.5	4.22	89.5	14	4.06	70.2
RPOB	DNA-directed RNA polymerase subunit beta (RNAP subunit beta) (EC 2.7.7.6) (RNA polymerase subunit beta) (Transcriptase subunit beta)	P0A8V2	24	70.6	1335	99.5	4.21	112.1	24	4.21	112.1
RPOB_24	DNA-directed RNA polymerase subunit beta	A7ZUK1	8	100	1340	99.9	4.27	127.3	8	4.27	127.3
RPOB_57	DNA-directed RNA polymerase subunit beta	P0A8V4	5	83.3	1340	99.9	3.77	274	10	3.77	179.3
RPOC	DNA-directed RNA polymerase subunit beta' (RNAP subunit beta') (EC 2.7.7.6) (RNA polymerase subunit beta') (Transcriptase subunit beta')	P0A8T7	18	54.5	916	65.1	4.14	90	18	4.14	90
RPOC_24	DNA-directed RNA polymerase subunit beta'	A7ZUK2	5	71.4	916	65.1	4.15	151	5	4.15	151
RPOC_57	DNA-directed RNA polymerase subunit beta'	P0A8T8	8	80	915	65	3.94	122.9	11	3.93	119.8
RPOD	RNA polymerase sigma factor RpoD (Sigma-70)	P00579	35	92.1	367	59.9	4.04	71.9	35	4.04	71.9
RPOE	ECF RNA polymerase sigma-E factor	P0AGB6/Q0P6M2	2	66.7	87	45.5	1.6		4	1.6	144.7
RPOS	RNA polymerase sigma factor RpoS (Sigma S) (Sigma-38)	P13445	3	100	276	83.6	4.14	479.1	3	4.14	479.1
RPOZ	DNA-directed RNA polymerase subunit omega (RNAP omega subunit) (EC 2.7.7.6) (RNA polymerase omega subunit) (Transcriptase subunit omega)	P0A800	20	66.7	89	97.8	4.24	77.1	20	4.24	77.1
RPOZ_24	DNA-directed RNA polymerase subunit omega	A7ZTK1	5	100	89	97.8	4.55	59	5	4.55	59
RPOZ_57	DNA-directed RNA polymerase subunit omega	P0A802/B1IYV1	7	77.8	89	97.8	3.82	106	8	3.86	86.9
RPPH	RNA pyrophosphohydrolase	P0A776/B7MLH6/A7ZQT6	3	37.5	158	89.8	2.34	161.8	3	2.34	161.8
RPSB	30S ribosomal protein S2 (Small ribosomal subunit protein uS2)	P0A7V0	41	91.1	218	90.5	3.21	47.3	41	3.21	47.3
RPSC	30S ribosomal protein S3 (Small ribosomal subunit protein uS3)	P0A7V3	41	97.6	206	88.4	3.21	74.7	41	3.21	74.7
RPSD	30S ribosomal protein S4 (Small ribosomal subunit protein uS4)	P0A7V8	42	100	205	99.5	3.23	59.3	42	3.23	59.3
RPSE	30S ribosomal protein S5	P0A7W1	43	97.7	150	89.8	3.24	57.2	43	3.24	57.2
RPSF	30S ribosomal protein S6	P02358	43	97.7	100	74.1	3.24	51	43	3.24	51
RPSG	30S ribosomal protein S7 (Small ribosomal subunit protein uS7)	P02359	42	100	150	83.8	3.23	52.9	42	3.23	52.9
RPSH	30S ribosomal protein S8	P0A7W7	43	95.6	129	99.2	3.24	59.9	43	3.24	59.9
RPSI	30S ribosomal protein S9 (Small ribosomal subunit protein uS9)	P0A7X3	41	100	127	97.7	3.21	55.7	41	3.21	55.7
RPSJ	30S ribosomal protein S10	P0A7R5	42	89.4	98	95.1	3.23	62.3	42	3.23	62.3
RPSK	30S ribosomal protein S11	P0A7R9	43	97.7	117	90.7	3.24	53.8	43	3.24	53.8
RPSL	30S ribosomal protein S12	P0A7S3	42	97.7	123	99.2	3.23	81.1	42	3.23	81.1
RPSM	30S ribosomal protein S13	P0A7S9	42	97.7	114	96.6	3.23	54.6	42	3.23	54.6
RPSN	30S ribosomal protein S14	P0AG59	8	19	100	99	2.93	220.9	16	2.93	192.4
RPSO	30S ribosomal protein S15	Q8X9M2/C3SSQ7/C3SSQ8/P0ADZ5	5	100	88	98.9	3.26	83	9	3.26	65.8
RPSP	30S ribosomal protein S16	P0A7T3	43	97.7	82	100	3.24	48.3	43	3.24	48.3
RPSQ	30S ribosomal protein S17	P0AG63	41	97.6	80	95.2	3.23	51.2	41	3.23	51.2
RPSR	30S ribosomal protein S18	P0A7T7	42	97.7	55	73.3	3.23	45.8	42	3.23	45.8
RPSS	30S ribosomal protein S19	P0A7U3	43	97.7	79	85.9	3.24	37.8	43	3.24	37.8
RPST	30S ribosomal protein S20	P0A7U7	43	95.6	85	97.7	3.24	60.9	43	3.24	60.9
RPSU	30S ribosomal protein S21	P68679/P68680	41	97.6	51	71.8	3.23	27	41	3.23	27
RRAA	Regulator of ribonuclease activity A	P0A8R0	3	100	158	98.1	2.57	212.4	6	2.57	132.4
RRRD	Lysozyme RrrD	P78285	1	100	165	100	2.4		4	2.4	106
RSEB	Sigma-E factor regulatory protein RseB	P0AFX9	4	100	183	57.5	2.46	135.4	4	2.46	135.4
RSEP	Regulator of sigma-E protease RseP	P0AEH1	4	66.7	84	18.7	1.92	76.7	6	2.13	65.8
RSMA	Ribosomal RNA small subunit methyltransferase A	P06992	2	100	251	91.9	2.1		4	2.1	137.4
RSMD	Ribosomal RNA small subunit methyltransferase D (EC 2.1.1.171) (16S rRNA m2G966 methyltransferase) (rRNA (guanine-N(2)-)-methyltransferase)	P0ADX9	1	100	157	79.3	2.05		5	2.05	216.9
RSMF	Ribosomal RNA small subunit methyltransferase F	P76273	1	100	390	81.4	2.9		4	2.9	894.4
RSMI	Ribosomal RNA small subunit methyltransferase I	P67087	1	100	165	57.7	2.21		3	2.21	426.9
RSUA	Ribosomal small subunit pseudouridine synthase A (EC 5.4.99.19) (16S pseudouridylate 516 synthase) (16S rRNA pseudouridine(516) synthase) (rRNA pseudouridylate synthase A) (rRNA-uridine isomerase A)	P0AA43	3	100	231	100	2.25	171.1	3	2.25	171.1
RTCA	RNA 3'-terminal phosphate cyclase (RNA cyclase) (RNA-3'-phosphate cyclase) (EC 6.5.1.4)	P46849	7	100	334	98.8	2	102.3	7	2	102.3
RUSA	Crossover junction endodeoxyribonuclease RusA (EC 3.1.22.4) (Holliday junction nuclease RusA) (Holliday junction resolvase)	P0AG74	3	100	116	96.7	2.07	146.7	4	2.33	98
RUTC	Putative aminoacrylate peracid reductase RutC	P0AFQ6	1	100	110	85.9	1.95		6	1.95	359.3
RUTR	HTH-type transcriptional regulator RutR (Rut operon repressor)	P0ACU2/P0ACU3	4	100	196	92.5	2.22	97.9	7	2.19	95.4
RUVA	Holliday junction ATP-dependent DNA helicase RuvA (EC 3.6.4.12)	P0A809	5	100	140	69	3.2	104.9	5	3.2	104.9
RUVC	Crossover junction endodeoxyribonuclease RuvC	P0A814	1	100	158	91.3	2.5		4	2.5	87.5
SATP	Succinate-acetate/proton symporter SatP	P0AC98	1	100	181	96.3	2.8		6	2.8	213.8
SBCB	Exodeoxyribonuclease I (ExoI) (Exonuclease I) (EC 3.1.11.1) (DNA deoxyribophosphodiesterase) (dRPase)	P04995	12	100	149	31.4	2.33	121.5	12	2.33	121.5
SBCD	Nuclease SbcCD subunit D	P0AG76(E8Y9D8)	3	100	339	84.8	2.04	378.4	6	2.04	267.8
SCPB	Methylmalonyl-CoA decarboxylase	P52045	7	87.5	259	99.2	1.87	277.5	13	1.81	246.1
SDHA	Succinate dehydrogenase flavoprotein subunit (EC 1.3.5.1)	P0AC41	10	100	588	100	2.86	206.1	10	2.86	206.1
SDHB	Succinate dehydrogenase iron-sulfur subunit (EC 1.3.5.1)	P07014	10	100	238	100	2.86	223.9	10	2.86	223.9
SDHC	Succinate dehydrogenase cytochrome b556 subunit (Cytochrome b-556)	P69054	10	100	121	93.8	2.86	189.6	10	2.86	189.6
SDHD	Succinate dehydrogenase hydrophobic membrane anchor subunit	P0AC44	10	100	105	91.3	2.86	184.9	10	2.86	184.9
SDHE	FAD assembly factor SdhE (Antitoxin CptB)	P64559/P64561	4	100	78	88.6	1.99	99.8	7	1.99	64.3
SDIA(ECS2654)	Regulatory protein SdiA	P07026/Q8XBD0	5	100	236	98.3	2.75	142.8	9	2.79	106.5
SECA	Protein translocase subunit SecA	P10408	4	66.7	464	51.5	2.08	354.2	8	2.08	187.9
SECB	Protein-export protein SecB (Chaperone SecB)	P0AG86	1	100	132	85.2	2.35		4	2.35	181.4
SEQA	Negative modulator of initiation of replication	P0AFY8	4	80	111	61.3	2.78	122.6	4	2.78	122.6
SERA	D-3-phosphoglycerate dehydrogenase (PGDH) (EC 1.1.1.95) (2-oxoglutarate reductase) (EC 1.1.1.399)	P0A9T0	6	85.7	404	98.5	2.6	112.5	6	2.6	112.5
SERC	Phosphoserine aminotransferase	P23721	2	100	360	99.4	2.55		4	2.55	605
SKP	Chaperone protein Skp	P0AEU7	2	100	141	87.6	2.33		3	2.33	143.9
SLMA	Nucleoid occlusion factor SlmA (Protein Ttk) (Synthetically lethal with a defective Min system protein A)	P0C093	2	66.7	189	95.5	2.69		8	2.69	82.8
SLT	Soluble lytic murein transglycosylase (EC 4.2.2.n1) (Exomuramidase) (Peptidoglycan lytic exotransglycosylase) (Slt70)	P0AGC3	3	100	618	95.8	2.12	411	3	2.12	411
SODA	Superoxide dismutase [Mn] (EC 1.15.1.1) (MnSOD)	P00448	13	100	205	99.5	1.73	164.2	13	1.73	164.2
SODB	Superoxide dismutase [Fe] (EC 1.15.1.1)	P0AGD3	6	100	192	99.5	1.68	262	6	1.68	262
SOLA	N-methyl-L-tryptophan oxidase	P40874	1	100	369	99.2	3.2		4	3.2	255.5
SOPB	Protein SopB	P62558	3	75	110	34.1	2.94	200.3	8	2.95	92.2
SPEE	Polyamine aminopropyltransferase	P09158	1	100	255	88.5	2.9		4	2.9	1005.6
SPEG	Spermidine N(1)-acetyltransferase	P0A951/A0A0M3KKU5	3	100	144	77.4	2.38	130.1	8	2.56	92.2
SPPA	Protease 4 (EC 3.4.21.-) (Endopeptidase IV) (Protease IV) (Signal peptide peptidase)	P08395	2	100	457	73.9	2.66		8	2.66	208.9
SPY	Periplasmic chaperone Spy (Spheroplast protein Y)	P77754/Q8XDZ4/C6ECL5	3	30	91	56.5	2.36	87.6	8	2.44	55.1
SSB	Single-stranded DNA-binding protein (SSB) (Helix-destabilizing protein)	P0AGE0	4	40	112	62.9	2.6	67.2	4	2.6	67.2
SSPB	Stringent starvation protein B (Adapter protein SspB) (Specificity-enhancing factor SspB)	P0AFZ3	3	100	107	64.8	2.3	176.9	6	2.3	110.3
SSUD	Alkanesulfonate monooxygenase	P80645	2	100	249	65.4	2.25		3	2.27	251.1
SSUE	FMN reductase (NADPH) (EC 1.5.1.38) (FMN reductase) (Sulfate starvation-induced protein 4) (SSI4)	P80644	5	83.3	173	90.6	1.99	110	9	2.02	97
STXII	Shiga toxin 2 subunit B	Q7DJJ2	1	100	70	78.7	1.56		5	1.56	132.2
STX2B	Shiga toxin 2 subunit B	A7UQX3	1	100	70	78.7	2.49		10	2.49	92.3
STX2EB	Orf protein	Q47644	3	100	68	78.2	2.39	236	9	2.39	149.1
SUBB	Subtilase SubB	Q3ZTX8	4	100	114	80.9	2.25	238.9	10	2.17	173.3
SUCB	Dihydrolipoyllysine-residue succinyltransferase component of 2-oxoglutarate dehydrogenase complex	P0AFG6/A0A0K4N9D8	3	75	218	53.8	2.73	226.6	8	2.9	174.6
SUCC	Succinate--CoA ligase [ADP-forming] subunit beta (EC 6.2.1.5) (Succinyl-CoA synthetase subunit beta) (SCS-beta)	P0A836	11	100	385	99.2	2.62	85.9	11	2.62	85.9
SUCD	Succinate--CoA ligase [ADP-forming] subunit alpha (EC 6.2.1.5) (Succinyl-CoA synthetase subunit alpha) (SCS-alpha)	P0AGE9	11	100	286	99	2.62	89.6	11	2.62	89.6
SUFB	FeS cluster assembly protein SufB	P77522	2	100	334	67.5	3.62		4	3.62	131.6
SUFC	Probable ATP-dependent transporter SufC	P77499	4	100	239	96.4	2.99	68.6	5	2.98	67.2
SUFD	FeS cluster assembly protein SufD	P77689	4	100	361	85.3	2.8	161.9	7	2.59	156.3
SUFS	Cysteine desulfurase (EC 2.8.1.7) (Selenocysteine beta-lyase) (SCL) (Selenocysteine lyase) (EC 4.4.1.16) (Selenocysteine reductase)	P77444	14	93.3	404	99.5	2.29	232.9	15	2.32	225.1
SUHB	Inositol-1-monophosphatase	P0ADG4	3	100	220	82.4	1.93	202.9	4	1.86	147
SURA	Chaperone SurA	P0ABZ6	2	50	139	32.5	3.2		6	3.13	89.7
TALB	Transaldolase B (EC 2.2.1.2)	P0A870	12	100	316	99.7	1.96	182.1	12	1.96	182.1
TAR	Methyl-accepting chemotaxis protein II (MCP-II) (Aspartate chemoreceptor protein)	P07017	4	100	142	25.7	1.78	287.8	4	1.78	287.8
TATD	3'-5' ssDNA/RNA exonuclease TatD (EC 3.1.11.-) (EC 3.1.13.-) (DNase TatD)	P27859	3	100	260	100	2.3	205.1	3	2.3	205.1
TAUD	Alpha-ketoglutarate-dependent taurine dioxygenase (EC 1.14.11.17) (2-aminoethanesulfonate dioxygenase) (Sulfate starvation-induced protein 3) (SSI3)	P37610	3	75	279	98.6	2.3	244.3	9	2.23	109.7
TCDA	tRNA threonylcarbamoyladenosine dehydratase (EC 6.1.-.-) (t(6)A37 dehydratase)	Q46927	5	100	213	79.5	1.9	361.8	10	1.88	229.9
TDCF	Putative reactive intermediate deaminase TdcF (EC 3.5.4.-)	P0AGL2	4	100	127	98.4	2	377.6	4	2	377.6
TEHB	Tellurite methyltransferase (EC 2.1.1.265) (Chalcogen-detoxifying protein TehB) (Selenite methyltransferase) (Tellurite resistance protein TehB)	P25397/Q8X9V6	3	100	176	89.3	1.86	247.4	9	1.91	132.5
TESA	Thioesterase 1/protease 1/lysophospholipase L1 (TAP) (Acyl-CoA thioesterase 1) (TESA) (EC 3.1.2.2) (Acyl-CoA thioesterase I) (Arylesterase) (EC 3.1.1.2) (Lysophospholipase L1) (EC 3.1.1.5) (Oleoyl-[acyl-carrier-protein] hydrolase) (EC 3.1.2.14) (Phospholipid degradation C) (Pldc) (Protease 1) (EC 3.4.21.-) (Protease I) (Thioesterase I/protease I) (TEP-I)	P0ADA1	9	100	145	69.7	1.66	137.2	9	1.66	137.2
TETR	Tetracycline repressor protein class D	P0ACT4	28	68.3	148	67.9	2.02	80.1	28	2.02	80.1
(TETR2)	Tetracycline repressor protein class B from transposon Tn10	P04483	3	27.3	149	72	2.47	117.7	7	2.47	86.6
THIB	Thiamine-binding periplasmic protein	P31550	1	100	308	94.2	2.25		4	2.25	302.4
THIF	Sulfur carrier protein ThiS adenylyltransferase (EC 2.7.7.73)	P30138	3	100	175	69.7	2.56	245.5	8	2.63	135
THPR	RNA 2',3'-cyclic phosphodiesterase	A0A140NFI1	7	87.5	174	98.9	2.23	152.1	8	2.17	152.2
THRS	Threonine--tRNA ligase (EC 6.1.1.3) (Threonyl-tRNA synthetase) (ThrRS)	P0A8M3	11	73.3	398	62	2.14	122.9	11	2.14	122.9
THYA	Thymidylate synthase (TS) (TSase) (EC 2.1.1.45)	P0A884	64	98.5	260	98.5	2.1	106	64	2.1	106
TIBC	Glycosyltransferase TibC	Q9S4K6/(H5MH13)	2	100	381	93.8	3.38		15	3.35	301
TKTA	Transketolase 1 (TK 1) (EC 2.2.1.1)	P27302	5	100	662	99.8	1.62	305.8	10	1.62	261.8
TLDD	Metalloprotease TldD (EC 3.4.-.-)	P0AGG8	6	100	480	99.8	1.47	194	6	1.47	194
TNAA	Tryptophanase (EC 4.1.99.1) (L-tryptophan indole-lyase) (TNase)	P0A853	5	83.3	396	84.1	2.56	124.4	5	2.56	124.4
TNPA	Transposase for transposon Tn5	Q46731	5	83.3	367	77.1	2.4	187.2	5	2.4	187.2
TNPR	Transposon gamma-delta resolvase	P03012	4	57.1	140	76.5	3.45	51	4	3.45	51
TNSA	Transposon Tn7 transposition protein TnsA	P13988	2	100	260	95.2	2.13		4	2.13	250.5
TNSE	Transposon Tn7 transposition protein TnsE	P05845	2	100	157	29.2	2.31		8	2.58	136.2
TOLA	Tol-Pal system protein TolA	P19934/Q8X965	4	100	88	20.9	2.28	57.4	5	2.32	56.5
TOLB	Protein TolB	P0A855	6	100	381	88.6	1.99	105.4	6	1.99	105.4
TOLC	Outer membrane protein TolC (Multidrug efflux pump subunit TolC) (Outer membrane factor TolC)	P02930	6	100	428	86.8	2.85	200.7	6	2.85	200.7
TONB	Protein TonB	P02929	5	100	69	28.9	2.16	31.7	5	2.16	31.7
TOPB	DNA topoisomerase 3 (EC 5.99.1.2) (DNA topoisomerase III)	P14294	6	85.7	617	94.5	2.39	110.7	6	2.39	110.7
TORR	TorCAD operon transcriptional regulatory protein TorR	P38684	1	100	120	52.2	1.8		4	1.8	98
TPD	High affinity Fe+2 binding protein periplasmic component	B1VCI2/(A0A0J9WZP9)	4	100	149	85.1	1.55	158.7	9	1.56	129.3
TPIA	Triosephosphate isomerase (TIM) (TPI) (EC 5.3.1.1) (Triose-phosphate isomerase)	P0A858/B1XB85/(C5A086/H0QFE6)	5	100	238	93.3	2.1	210	10	2.1	145.6
TPX	Thiol peroxidase (EC 1.11.1.-) (Scavengase P20)	P0A862	6	100	164	97.6	2.11	89.9	6	2.11	89.9
TRAE	Conjugal transfer protein	Q17U16	5	100	142	61.2	2.58	150	9	2.56	132.2
TRAJ	Protein TraJ	P06626	1	100	109	47.6	1.55		4	1.55	99.4
TRAM	Relaxosome protein TraM	P10026	3	60	63	49.6	1.92	272.6	7	2.28	217.1
TRAN	TraN protein	Q46702	1	100	25	52.1	2.6		8	2.6	680.1
TREA	Periplasmic trehalase (EC 3.2.1.28) (Alpha,alpha-trehalase) (Alpha,alpha-trehalose glucohydrolase) (Tre37A)	P13482	4	100	394	69.7	1.93	280.4	4	1.93	280.4
TRFB	TrfB transcriptional repressor protein	P03052	4	100	95	94.1	2.16	72.7	4	2.16	72.7
TRMB	tRNA (guanine-N(7)-)-methyltransferase (EC 2.1.1.33) (tRNA (guanine(46)-N(7))-methyltransferase) (tRNA(m7G46)-methyltransferase)	P0A8I5	3	100	185	77.4	1.71	332.7	3	1.71	332.7
TRMJ	tRNA (cytidine/uridine-2'-O-)-methyltransferase TrmJ (EC 2.1.1.200) (tRNA (cytidine(32)/uridine(32)-2'-O)-methyltransferase) (tRNA Cm32/Um32 methyltransferase)	P0AE01	3	100	163	66.3	2	190.4	3	2	190.4
TRML	tRNA (cytidine(34)-2'-O)-methyltransferase (EC 2.1.1.207) (tRNA (cytidine/uridine-2'-O-)-methyltransferase TrmL)	P0AGJ7/Q1R4Y9	3	100	153	97.5	2.11	207.2	5	2.06	191.8
TRPR	Trp operon repressor	P0A881	19	90.5	97	89.8	1.75	47.4	19	1.75	47.4
TRUA	tRNA pseudouridine synthase A (EC 5.4.99.12) (tRNA pseudouridine(38-40) synthase) (tRNA pseudouridylate synthase I) (PSU-I) (tRNA-uridine isomerase I)	P07649	3	75	264	97.8	2.97	226.4	8	3.15	164.9
TRUD	tRNA pseudouridine synthase D (EC 5.4.99.27) (tRNA pseudouridine(13) synthase) (tRNA pseudouridylate synthase D) (tRNA-uridine isomerase D)	Q57261	2	66.7	340	97.4	2.2		3	2.2	285.2
TRWB	TrwB	Q04230	5	100	366	72.2	2.74	242.7	10	2.74	237
TRWC	TrwC	Q47673	7	100	261	27	2.41	107.6	7	2.41	107.6
TRXA	Thioredoxin 1 (Trx-1)	P0AA25	59	95.2	103	94.5	2.29	56.6	59	2.29	56.6
TRXA_57	Thioredoxin 1	P0AA27	3	75	103	94.5	3.27	133.3	8	3.33	80
TRXB	Thioredoxin reductase (TRXR) (EC 1.8.1.9)	P0A9P4	5	100	316	98.4	2.37	108.5	5	2.37	108.5
TSAB	tRNA threonylcarbamoyladenosine biosynthesis protein TsaB (t(6)A37 threonylcarbamoyladenosine biosynthesis protein TsaB)	P76256	4	100	218	94.4	2.32	178.1	9	2.31	128.8
TSAD	tRNA N6-adenosine threonylcarbamoyltransferase (EC 2.3.1.234) (N6-L-threonylcarbamoyladenine synthase) (t(6)A synthase) (t(6)A37 threonylcarbamoyladenosine biosynthesis protein TsaD) (tRNA threonylcarbamoyladenosine biosynthesis protein TsaD)	P05852	3	100	332	98.5	2.33	332.2	3	2.33	212.5
TSF	Elongation factor Ts (EF-Ts) (Bacteriophage Q beta RNA-directed RNA polymerase subunit IV)	P0A6P1	5	83.3	278	98.2	2.59	107.4	5	2.59	107.4
TSF_57	Elongation factor Ts	P0A6P3	11	100	279	98.6	2.84	114.1	11	2.84	114.1
TSF_X	Elongation factor Ts	C3TPM7/A0A0M3KKV2	3	100	277	97.9	2.12	602.5	6	2.12	237.1
TSR	Methyl-accepting chemotaxis protein I	P02942	2	50	218	39.6	2.63		4	2.63	128.9
TSX	Nucleoside-specific channel-forming protein tsx	P0A927	3	100	198	67.3	3.07	595	6	3.07	388.3
TTK	Nucleoid occlusion factor SlmA	Q1R4V1	1	100	189	89.2	2.65		8	2.65	154.9
TUF1	Elongation factor Tu 1	A8A5E6	3	100	385	97.7	2.76	220.4	4	2.77	163.2
TUFA	Elongation factor Tu 1 (EF-Tu 1) (Bacteriophage Q beta RNA-directed RNA polymerase subunit III) (P-43)	P0CE47	13	81.3	328	83.2	2.6	48.9	13	2.6	48.9
TUFA_57	Elongation factor Tu	P0A6N3	11	100	330	83.8	2.84	160.1	11	2.84	160.1
TUFA_DH	Elongation factor Tu	A0A0M3KKV1/A0A140N6W0	4	100	329	83.5	2.13	141.6	7	2.12	115
TUFB	Elongation factor Tu 2 (EF-Tu 2) (Bacteriophage Q beta RNA-directed RNA polymerase subunit III) (P-43)	P0CE48	6	75	330	83.8	2.73	54	6	2.73	54
TUS	DNA replication terminus site-binding protein (Ter-binding protein)	P16525	8	100	305	98.7	2.56	144.2	8	2.56	144.2
TUSA	Sulfur carrier protein TusA	P0A892	2	100	76	93.8	2.44		3	2.43	297.7
TUSB	Protein TusB	P45530	1	100	95	100	2.15		3	2.15	546
TUSC	Protein TusC	P45531	1	100	118	99.2	2.15		3	2.15	606.1
TUSD	Sulfurtransferase TusD	P45532	1	100	128	100	2.15		3	2.15	639.1
TYNA	Primary amine oxidase (EC 1.4.3.21) (2-phenylethylamine oxidase) (Copper amine oxidase) (Tyramine oxidase)	P46883	17	94.4	718	94.8	2.21	280.2	22	2.21	246.9
TYPA	GTP-binding protein TypA/BipA (Tyrosine phosphorylated protein A)	P32132	3	42.9	484	79.7	3	377.1	6	3	259.1
TYRB	Aromatic-amino-acid aminotransferase (ARAT) (AROAT) (EC 2.6.1.57) (Beta-methylphenylalanine transaminase) (EC 2.6.1.107)	P04693	2	100	397	100	2.93		6	2.93	154.7
TYRS	Tyrosine--tRNA ligase (EC 6.1.1.1) (Tyrosyl-tRNA synthetase) (TyrRS)	P0AGJ9	6	100	318	75	2.2	184.7	6	2.2	184.7
UBIC	Chorismate pyruvate-lyase (CL) (CPL) (EC 4.1.3.40)	P26602	7	100	164	99.4	1.78	82.4	11	1.97	67.6
UBID	3-octaprenyl-4-hydroxybenzoate carboxy-lyase (EC 4.1.1.98) (Polyprenyl p-hydroxybenzoate decarboxylase)	P0AAB4/P0AAB5	5	100	360	72.4	2.82	83.2	5	2.82	83.2
UBIG	Ubiquinone biosynthesis O-methyltransferase	P17993/A8A296	3	100	144	60	2.06	211.6	3	2.06	211.6
UBIJ	Ubiquinone biosynthesis protein UbiJ	P0ADP7	3	100	113	56.2	2.11	184	8	2.21	102
UDP	Uridine phosphorylase (UPase) (UrdPase) (EC 2.4.2.3)	P12758	15	100	222	87.7	2.22	96.6	15	2.22	96.6
UIDA	Beta-glucuronidase (GUS) (EC 3.2.1.31) (Beta-D-glucuronoside glucuronosohydrolase)	P05804	7	100	361	59.9	2.53	169	7	2.53	169
UIDR	HTH-type transcriptional regulator UidR	P0ACT8	1	100	140	71.4	2.09		4	2.09	260.9
ULAA	Ascorbate-specific PTS system EIIC component (Ascorbate-specific permease IIC component UlaA)	P39301	2	100	378	81.3	2.01		3	2.12	361.3
ULAD	3-keto-L-gulonate-6-phosphate decarboxylase UlaD (EC 4.1.1.85) (3-dehydro-L-gulonate-6-phosphate decarboxylase) (KGPDC) (L-ascorbate utilization protein D)	P39304	14	100	213	98.6	1.75	207.9	23	1.75	181.4
ULAE	L-ribulose-5-phosphate 3-epimerase UlaE	Q8XDI5	3	75	261	91.9	2.16	657.5	5	2.17	293.4
UMUD	Protein UmuD (EC 3.4.21.-) [Cleaved into: Protein UmuD']	P0AG11	2	100	105	75.5	2.75		4	2.75	343
UNG	Uracil-DNA glycosylase (UDG) (EC 3.2.2.27)	P12295	13	100	220	96.1	2.21	75.6	13	2.21	75.6
UPP	Uracil phosphoribosyltransferase	P0A8F0	1	100	207	99.5	2.8		4	2.8	208.3
UPPP	Undecaprenyl-diphosphatase	P60933	4	80	270	98.9	2.38	291.9	4	2.38	291.9
USHA	Protein UshA	P07024	5	55.6	523	95.1	2.08	113.4	11	2.02	97.4
UVRD	DNA helicase II (EC 3.6.4.12)	P03018	5	100	356	49.4	2.5	58.1	5	2.5	58.1
UXUA	Mannonate dehydratase (EC 4.2.1.8) (D-mannonate hydro-lyase)	P24215	2	100	393	99.7	2.33		8	2.33	328.3
VSR	Very short patch repair protein (EC 3.1.-.-) (DNA mismatch endonuclease) (V.EcoKDcm) (Vsr mismatch endonuclease)	P09184	3	100	134	85.9	2.3	130.8	3	2.3	130.8
WBDK	Putative pyridoxamine 5-phosphate-dependent dehydrase	B1B4V9	1	100	380	97.9	2.2		8	2.2	180.6
WBDK_2	Putative pyridoxamine 5-phosphate-dependent dehydrase	Q9F118	4	100	386	99.5	1.83	268.7	8	1.83	205.7
WECB	UDP-N-acetylglucosamine 2-epimerase (EC 5.1.3.14) (Bacteriophage N4 adsorption protein C) (UDP-GlcNAc-2-epimerase)	P27828	2	100	310	82.4	2.41		6	2.41	97.6
WECD	dTDP-fucosamine acetyltransferase	Q8FBQ3	2	100	222	99.1	1.81		4	1.81	240.4
WECE	dTDP-4-amino-4,6-dideoxygalactose transaminase	P27833	2	100	212	56.4	2.47		12	2.39	188.8
WRBA	NAD(P)H dehydrogenase (quinone) (EC 1.6.5.2) (Flavoprotein WrbA) (NAD(P)H:quinone oxidoreductase) (NQO)	P0A8G6/E2QJP6	10	90.9	146	73.7	1.74	194.4	15	1.85	170.3
WZA	Putative outer membrane lipoprotein Wza	Q9X4B7	3	100	322	85	2.67	422.8	9	2.67	340.6
WZB	Putative acid phosphatase Wzb	Q9X4B8	1	50	142	95.9	2.21		8	2.21	236.1
WZC	Tyrosine-protein kinase wzc (EC 2.7.10.-)	P76387	1	100	223	31	3.2		16	3.2	245.2
XAPA	Purine nucleoside phosphorylase 2 (EC 2.4.2.1) (Inosine-guanosine phosphorylase) (Purine nucleoside phosphorylase II) (PNP II) (Xanthosine phosphorylase)	P45563	3	100	172	62.1	2.97	545.9	9	2.97	465.7
XNI(YGDG)	Flap endonuclease Xni	Q8X6R9	5	71.4	194	77.3	1.79	162	5	1.79	162
XYLB	Xylulose kinase	P09099	2	100	333	68.8	2.4		4	2.4	162.6
XYLE	D-xylose-proton symporter (D-xylose transporter)	P0AGF4	4	57.1	475	96.7	3	156.8	4	3	156.8
XYLF	D-xylose-binding periplasmic protein	P37387	3	100	305	92.4	2.18	168.1	5	2.19	117.3
XYLR	Xylose operon regulatory protein	P0ACI3	2	100	335	85.5	3.18		4	3.31	88.1
YACG	DNA gyrase inhibitor YacG	P0A8H8	1	100	47	72.3	3.3		4	3.3	108.9
YAFQ	mRNA interferase YafQ (EC 3.1.-.-) (Endoribonuclease YafQ) (Toxin YafQ)	Q47149	5	100	90	97.8	1.74	153.4	13	1.85	133.4
YAGE	Probable 2-keto-3-deoxy-galactonate aldolase YagE (Probable KDGal aldolase YagE) (EC 4.1.2.-)	P75682	8	100	298	98.7	2.3	298.3	16	2.3	269.5
PDEL(YAHA)	Cyclic di-GMP phosphodiesterase YahA (EC 3.1.4.-)	P21514	3	100	252	69.6	1.93	140.5	7	2.1	125.8
YAJL	Protein deglycase 3 (EC 3.1.2.-) (EC 3.5.1.124) (Chaperone protein YajL)	Q46948	2	100	195	99.5	1.04		4	1.04	357.3
YBAB	Nucleoid-associated protein YbaB	P0A8B5	1	100	71	65.1	2.2		4	2.2	109.5
YBEY	Endoribonuclease YbeY	P0A898	1	100	148	95.5	2.7		4	2.7	350.1
YBFF	Esterase YbfF	P75736	2	100	254	100	1.39		4	1.39	596.4
YBGC	Acyl-CoA thioester hydrolase YbgC (Acyl-CoA thioesterase) (EC 3.1.2.-)	P0A8Z3/P0A8Z5	4	100	129	96.3	1.89	237.6	8	1.89	142.2
YBGI	GTP cyclohydrolase 1 type 2 homolog (Radiation resistance protein YbgI)	P0AFP6	2	100	247	100	2.2		12	2.2	253.3
YBIV	Sugar phosphatase YbiV (EC 3.1.3.23)	P75792	4	100	268	98.9	2	111.7	7	2.01	96.8
YBL13_1	DUF1778 domain-containing protein	J7QA90	3	50	81	92	3.09	165.1	5	3.03	104.9
YCAO	Ribosomal protein S12 methylthiotransferase accessory factor YcaO	P75838	2	66.7	528	90.1	2.45		6	2.38	377.3
YCDX	Probable phosphatase YcdX (EC 3.1.3.-)	P75914	3	100	157	64.1	1.94	476.7	5	1.94	284.4
YCEI	Protein YceI	P0A8X2	1	100	169	88.5	2.2		4	2.2	759.5
YCGM	Uncharacterized protein YcgM	P76004	1	100	182	83.1	2.7		4	2.7	206.8
YCHN	Protein YchN	P0AB52	1	100	117	100	2.8		6	2.8	139
YCIK	Hypothetical oxidoreductase yciK	P31808/A0A0H2V6Y9	3	75	240	95.2	1.88	217.6	5	1.74	154.2
YCJY	Uncharacterized protein YcjY	P76049	1	100	306	100	2		11	2	305.2
YDDE	Uncharacterized isomerase YddE (EC 5.1.-.-) (ORFB)	P37757	3	100	295	99.3	2.12	191.9	6	2.08	141.6
YDEJ	Inactive PncC family protein	Q8XB29	1	100	171	99.4	1.91		4	1.91	257.7
YDFG	NADP-dependent 3-hydroxy acid dehydrogenase YdfG (L-allo-threonine dehydrogenase) (EC 1.1.1.381) (Malonic semialdehyde reductase) (EC 1.1.1.298)	P39831	2	100	180	72.6	2.3		8	2.5	178.3
YDHF	Oxidoreductase YdhF	P76187	2	100	296	99.3	2.69		3	2.72	228.9
YDHR	Putative monooxygenase YdhR	P0ACX3	2	100	96	95	2.45		4	2.45	231.8
YDIB	Quinate/shikimate dehydrogenase (EC 1.1.1.282) (NAD-dependent shikimate 5-dehydrogenase)	P0A6D5	3	100	280	97.2	2.3	184.1	6	2.3	122.4
YDIF	Acetate CoA-transferase YdiF	Q8X5X6	3	100	273	51.4	2.02	461	12	2.02	288
YDIV	Putative anti-FlhC(2)FlhD(4) factor YdiV (c-di-GMP regulator CdgR)	P76204	2	100	181	76.4	2.41		6	2.57	159.5
YDJH	Uncharacterized sugar kinase YdjH	P77493	2	100	307	97.5	1.98		3	2.03	298.5
YEAR	Uncharacterized protein YeaR	P64488	1	100	103	86.6	2.3		4	2.3	162
YECD	Isochorismatase family protein YecD (EC 3.-.-.-)	P0ADI7	1	100	185	98.4	1.3		4	1.3	417.4
YEDK	Putative SOS response-associated peptidase YedK	P76318	6	75	221	99.5	1.57	177.1	9	1.59	161.4
YEFM	Antitoxin YefM	P69346	1	100	55	66.3	2.05		4	2.05	118.7
YEGS	Lipid kinase YegS	P76407	2	100	141	47.2	2.28		3	2.15	156.9
YFBR	5'-deoxynucleotidase YfbR	P76491	3	100	95	47.7	2.1	292.4	6	2.1	140.6
YFBU_X	UPF0304 protein YfbU	E2QPF5/Q1R9C1	2	100	164	100	2.25		11	2.25	243.3
YFCD	Uncharacterized Nudix hydrolase YfcD	P65556	1	100	161	89.4	2		3	2	230
YFCE	Phosphodiesterase YfcE	P67095	1	100	182	98.9	2.25		4	2.25	245.7
YFCG	Disulfide-bond oxidoreductase YfcG	P77526	2	100	204	94.9	1.93		3	1.8	495
YFDE	Acetyl-CoA:oxalate CoA-transferase (ACOCT) (EC 2.8.3.19) (Acetyl-coenzyme A transferase) (CoA:oxalate CoA-transferase)	P76518	1	100	374	98.2	2.12		6	2.12	269.6
YFEX	Dye-decolorizing peroxidase YfeX	P76536	1	100	296	99	2.09		4	2.09	346
YFHL	Ferredoxin YfhL	P52102	1	100	80	93	1.65		3	1.65	135.4
YGAP	Inner membrane protein YgaP	P55734	5	100	103	59.2	1.62	449.7	5	1.62	449.7
YGBF	CRISPR-associated endoribonuclease Cas2 (EC 3.1.-.-)	P45956	11	84.6	91	96.8	3.17	85.2	11	3.17	85.2
YGBT	CRISPR-associated endonuclease Cas1 (EC 3.1.-.-)	Q46896	7	50	264	86.6	2.84	55.3	7	2.84	55.3
YGDR	Uncharacterized lipoprotein YgdR	P65294	1	100	51	70.8	2.7		6	2.7	99
YGEA	Uncharacterized protein YgeA of aspartate/glutamate/hydantoin racemase family	A0A140N890/(A0A0F6FBL7)	5	100	230	100	1.75	110.2	11	1.81	84.4
YGEX	Diaminopropionate ammonia-lyase (DAPAL) (EC 4.3.1.15) (2,3-diaminopropionate ammonia-lyase) (Alpha,beta-diaminopropionate ammonia-lyase) (Diaminopropionatase)	P66899	4	80	260	65.3	2.29	271.9	4	2.29	271.9
YGJK	Glucosidase YgjK (EC 3.2.1.-)	P42592	8	100	757	96.7	1.98	174.4	16	1.98	136.7
YHDE	Maf-like protein YhdE	P25536/L3WSY9	2	100	186	94.4	2.33		4	2.33	134.2
YHFG	Uncharacterized protein YhfG	P0ADX5	2	100	49	89.1	2.2		4	2.2	204.4
YHHX	Uncharacterized oxidoreductase YhhX (EC 1.-.-.-)	P46853	1	100	344	99.7	2		6	2	197.1
YICI	Alpha-xylosidase (EC 3.2.1.177)	P31434	5	100	772	100	2.17	316	9	2.14	291
YIDC	Membrane protein insertase YidC	P25714/Q1R4M9	2	50	264	48.8	3		4	3	173.4
YIHQ	Sulfoquinovosidase (SQase) (EC 3.2.1.199)	P32138	4	100	660	97.3	1.87	155.2	7	1.87	155.3
YIHS	Sulfoquinovose isomerase (SQ isomerase) (EC 5.3.1.31)	P32140	1	100	372	90.1	2.5		6	2.5	396.5
YIIM	Protein YiiM	P32157	3	100	144	64.3	2.57	255.6	6	2.57	178
YJIA	Uncharacterized GTP-binding protein YjiA	P24203	3	100	317	99.7	2.21	268.5	5	2.25	197.8
YJJX	Non-canonical purine NTP phosphatase (EC 3.6.1.-) (Inosine triphosphatase) (ITPase) (Non-standard purine NTP phosphatase) (Nucleoside-triphosphate phosphatase) (NTPase) (Xanthosine triphosphatase) (XTPase)	P39411	1	100	170	100	2.3		6	2.3	136
YMDB	O-acetyl-ADP-ribose deacetylase (EC 3.5.1.-) (Regulator of RNase III activity)	P0A8D6	4	100	171	96.6	2.4	189.5	4	2.4	189.5
YNCE	Uncharacterized protein YncE	P76116	2	100	321	90.9	2.3		8	2.3	225
YNJE	Thiosulfate sulfurtransferase YnjE (EC 2.8.1.1)	P78067	4	100	407	93.6	2.04	325	6	2.16	247.3
YOEB	Toxin YoeB (EC 3.1.-.-) (Putative endoribonuclease YoeB) (Putative mRNA interferase Yoeb)	P69348	4	100	84	100	2.31	85.8	10	2.38	59.6
YOHF	Uncharacterized oxidoreductase YohF	P33368	1	100	186	73.5	1.36		8	1.36	286.7
YPDF	Aminopeptidase YpdF	P76524	1	100	359	99.4	2.6		3	2.6	299.4
YPEA	Acetyltransferase YpeA (EC 2.3.1.-)	P76539/P63422	3	100	138	97.9	1.74	296.3	14	1.87	145.7
YPHB	Uncharacterized protein YphB	P76584	1	100	290	100	1.59		4	1.59	521
YQGF	Putative pre-16S rRNA nuclease	P0A8I1	2	100	99	71.7	1.95		4	1.95	93.4
YQHD	Alcohol dehydrogenase YqhD	Q46856	1	50	386	99.7	2		4	2	193.8
YQJG	Glutathionyl-hydroquinone reductase YqjG (GS-HQR) (EC 1.8.-.-)	P42620	4	100	299	91.2	2.36	246.8	7	2.38	169.6
YRDA	Protein YrdA	P0A9W9	2	100	174	94.6	1.86		6	1.56	256.6
YTFE	Iron-sulfur cluster repair protein YtfE (Regulator of cell morphogenesis and NO signaling) (RCMNS)	P69506	3	100	218	99.1	1.97	303.9	4	1.98	225.5
Z4353	Putative enzyme	Q8XBV0	1	100	235	76.3	2		6	2	687.8
ZAPB	Cell division protein ZapB	P0AF36	1	100	79	97.5	2.8		4	2.8	2313
ZAPC	Cell division protein ZapC	P75862	2	100	167	92.8	2.53		3	2.65	266.2
ZAPD	Cell division protein ZapD	P36680	3	100	245	99.2	2.72	161.7	5	2.79	101.1
ZINT	Metal-binding protein ZinT (Cadmium-induced protein ZinT)	P76344(U6NCE6)	9	100	185	85.6	1.91	115	11	1.86	116.7
ZIPA	Cell division protein ZipA (FtsZ interacting protein A)	P77173	6	100	136	41.5	1.94	111	6	1.94	111
ZNTR	HTH-type transcriptional regulator ZntR (Zn(II)-responsive regulator of zntA)	P0ACS5	3	100	88	62.4	2.13	243.7	5	2.06	191.5
ZNUA	High-affinity zinc uptake system protein ZnuA	P39172	6	100	170	54.8	1.98	143.9	12	1.98	113.1
ZUR	Zinc uptake regulation protein (Zinc uptake regulator)	P0AC51	2	100	148	86.5	2.5		8	2.5	87.2

## Sheet: ecoli_em
Gene	Protein	UniProt	Entries	Entries(%)	Length	Length(%)	Resolution	Score	Chains	Resolution	eUMF	by
ACRA	Multidrug efflux pump subunit AcrA	P0AE06/P0AE07	3	100	340	85.6	6.3	53.1	9	6.3	36.7	em			: reference set
ACRB	Multidrug efflux pump subunit AcrB (AcrAB-TolC multidrug efflux pump subunit AcrB) (Acridine resistance protein B)	P31224	3	60	1032	98.4	6.3	59	9	6.3	43.4	em		bold	: more than 1 chains per entry
ARFA	Alternative ribosome-rescue factor A	P36675	7	70	45	62.5	3.25	76.1	7	3.25	76.1	em
ATPA	ATP synthase subunit alpha (EC 3.6.3.14) (ATP synthase F1 sector subunit alpha) (F-ATPase subunit alpha)	P0ABB0	3	100	486	94.7	7.73	68.1	9	7.73	36.5	em
ATPC	ATP synthase epsilon chain (ATP synthase F1 sector epsilon subunit) (F-ATPase epsilon subunit)	P0A6E6	3	100	134	96.4	7.73	72.2	3	7.73	72.2	em
ATPD	ATP synthase subunit beta (EC 3.6.3.14) (ATP synthase F1 sector subunit beta) (F-ATPase subunit beta)	P0ABB4	3	100	458	99.6	7.73	44.4	9	7.73	28.3	em
ATPE	ATP synthase subunit c	P68699	3	75	75	94.9	7.73	200.8	15	7.73	117.9	em
ATPF	ATP synthase subunit b	P0ABA0	3	100	155	99.4	7.73	133.2	6	7.73	71.3	em
CLPB	Chaperone protein ClpB	V2RJ62	3	100	417	48.7	4.8	116.2	9	4.8	73	em
DEGQ	Periplasmic pH-dependent serine endoprotease DegQ	P39099	2	50	365	80.2	7.5		8	7.5	56.1	em
DNAB	Replicative DNA helicase (EC 3.6.4.12)	P0ACB0	3	100	445	94.5	3.8	46.7	9	3.8	31.3	em
DNAC	DNA replication protein DnaC	P0AEF0	2	100	147	60	3.65		8	3.65	43.6	em
DNAE	DNA polymerase III subunit alpha (EC 2.7.7.7)	P10443	4	100	926	79.8	7.6	69.9	4	7.6	69.9	em
DNAN	DNA polymerase III subunit beta (EC 2.7.7.7) (Beta sliding clamp) (Beta clamp)	P0A988	4	100	366	100	7.6	91.7	8	7.6	65.9	em
DNAQ	DNA polymerase III subunit epsilon (EC 2.7.7.7)	P03007	4	100	174	71.6	7.6	64.5	4	7.6	64.5	em
EXBB	Biopolymer transport protein ExbB	P0ABU7	2	100	221	90.6	6.9		7	6.93	65.1	em
FFH	Signal recognition particle protein	P0AGD7	4	50	290	64	5.58	34.9	4	5.58	34.9	em
FIMA	Type-1 fimbrial protein, A chain	P04128	2	100	154	84.6	4.2		8	4.2	221.7	em
FRR	Ribosome-recycling factor (RRF) (Ribosome-releasing factor)	P0A805	3	100	182	98.4	12.9	443.2	3	12.9	443.2	em
FUSA	Elongation factor G (EF-G)	P0A6M8	6	100	635	90.2	6.77	33.4	6	6.77	33.4	em
GROL	60 kDa chaperonin (GroEL protein) (Protein Cpn60)	P0A6F5	17	94.4	518	94.5	8.73	18.5	17	8.73	18.5	em
GROS	10 kDa chaperonin (GroES protein) (Protein Cpn10)	P0A6F9	4	66.7	97	100	11.6	125.7	12	11.6	86.1	em
HLYE	Hemolysin E, chromosomal (Cytotoxin ClyA) (Hemolysis-inducing protein) (Latent pore-forming 34 kDa hemolysin) (Silent hemolysin SheA)	P77335	3	100	285	94.1	3.43	276.9	9	3.43	277.1	em
HPF	Ribosome hibernation promoting factor	P0AFX0	2	100	95	100	5.45		3	6.27	75849.2	em
HSDM	Type I restriction enzyme EcoKI M protein	P08957	2	100	529	100	18		4	18	365.1	em
IADA	Isoaspartyl dipeptidase	P39377	1	100	288	73.8	10.5		8	10.5	1413.4	em
INFB	Translation initiation factor IF-2	P0A705	5	100	495	55.6	9.82	83.9	5	9.82	83.9	em
LACZ	Beta-galactosidase (Beta-gal) (EC 3.2.1.23) (Lactase)	P00722	5	100	1020	99.6	4.5	241.9	10	4.5	241.9	em
LPTB	Lipopolysaccharide export system ATP-binding protein LptB (EC 3.6.3.-)	P0A9V1	4	100	230	95.4	4.15	52.9	8	4.15	44.6	em
MACA	Macrolide export protein MacA	P75830	2	100	340	91.6	4.3		12	4.3	610.3	em
MACB	Macrolide export ATP-binding/permease protein MacB	P75831	2	100	403	62.2	4.3		4	4.3	3259.6	em
MANY	PTS system mannose-specific EIIC component	P69801	1	100	245	92.1	3.52		3	3.52	144771	em
MANZ	PTS system mannose-specific EIID component	P69805	1	100	266	94	3.52		3	3.52	167441	em
MCRB(Ct)	5-methylcytosine-specific restriction enzyme B (EC 3.1.21.-) (EcoKMcrBC)	P15005	6	100	284	61.9	4.25	211.4	12	4.25	130	em
MCRC	Protein McrC	P15006	6	100	240	69	4.25	205.1	11	4.31	208.9	em
MSBA	Lipid A export ATP-binding/permease protein MsbA	P60753	2	100	569	97.8	4.5		4	4.5	59.9	em
MSCS	Small-conductance mechanosensitive channel	A0A387D516	1	100	265	92.7	2.9		7	2.9	132667	em
PARM	Plasmid segregation protein ParM	P11904	6	85.7	318	99.4	13.7	36.9	10	12.3	39.7	em
PPDD	Prepilin peptidase-dependent pilin	Q8X974	1	100	140	95.9	8		14	8	68759.8	em
PQIB	Intermembrane transport protein PqiB	P43671	1	100	306	56	3.96		6	3.96	123900	em
PRFB	Peptide chain release factor RF2 (RF-2)	P07012	7	58.3	357	97.8	6.15	24.1	7	6.15	24.1	em
PSPF	Psp operon transcriptional activator	P37344	1	100	248	76.3	5.8		6	5.8	36.1	em
PYRG	CTP synthase (EC 6.3.4.2) (Cytidine 5'-triphosphate synthase) (Cytidine triphosphate synthetase) (CTP synthetase) (CTPS) (UTP--ammonia ligase)	P0A7E5	3	100	427	78.3	6.07	56149.1	12	6.07	319	em
RAVA	ATPase RavA	P31473	1	33.3	231	46.4	11		3	11	1038	em
RMF	Ribosome modulation factor	P0AFW2	2	100	53	96.4	5.45		3	6.27	69020.4	em
RPOB	DNA-directed RNA polymerase subunit beta (RNAP subunit beta) (EC 2.7.7.6) (RNA polymerase subunit beta) (Transcriptase subunit beta)	P0A8V2	11	35.5	1338	99.7	4.13	56	11	4.13	56	em
RPOC	DNA-directed RNA polymerase subunit beta' (RNAP subunit beta') (EC 2.7.7.6) (RNA polymerase subunit beta') (Transcriptase subunit beta')	P0A8T7	4	12.9	1358	96.5	7.75	37.2	4	7.75	37.2	em
RPOD	RNA polymerase sigma factor RpoD (Sigma-70)	P00579	5	71.4	367	59.9	7.5	47.5	5	7.5	47.5	em
RPOZ	DNA-directed RNA polymerase subunit omega (RNAP omega subunit) (EC 2.7.7.6) (RNA polymerase omega subunit) (Transcriptase subunit omega)	P0A800	4	13.3	89	97.8	11.2	17.5	4	11.2	17.5	em
RSGA	Small ribosomal subunit biogenesis GTPase RsgA	P39286	3	50	313	89.4	5.16	957.8	3	5.16	957.8	em
SECE	Protein translocase subunit SecE	P0AG96	2	28.6	111	87.4	14.9		4	14.9	38.5	em
SECG	Protein-export membrane protein SecG	P0AG99	2	33.3	77	70	14.9		4	14.9	39	em
SECY	Protein translocase subunit SecY	P0AGA2	5	62.5	416	93.9	9.28	14.3	5	9.28	14.3	em
TOLC	Outer membrane protein TolC (Multidrug efflux pump subunit TolC) (Outer membrane factor TolC)	P02930	5	100	428	86.8	5.5	43.2	10	5.5	41.6	em
TUFA	Elongation factor Tu 1 (EF-Tu 1) (Bacteriophage Q beta RNA-directed RNA polymerase subunit III) (P-43)	P0CE47	10	100	392	99.5	5.91	30	10	5.91	30	em
TUFB	Elongation factor Tu 2 (EF-Tu 2) (Bacteriophage Q beta RNA-directed RNA polymerase subunit III) (P-43)	P0CE48	8	88.9	386	98	7.64	30.2	8	7.64	30.2	em
YNAI	Low conductance mechanosensitive channel YnaI	P0AEB6	1	100	223	65	3.8		7	3.8	79821.6	em
ZNTB	Zinc transport protein ZntB	P64423	1	100	327	100	4.2		5	4.2	220.6	em

## Sheet: ecoli_mix
Gene	Protein	UniProt	Entries	Entries(%)	Length	Length(%)	Resolution	Score	Chains	Resolution	xeUMF	by
HPF	Ribosome hibernation promoting factor	P0AFX0	3	100	95	100	4.67	380.7	5	5	90.4	em, x-ray		bold	: more than 1 chains per entry
RMF	Ribosome modulation factor	P0AFW2	3	100	53	96.4	4.63	163.3	5	4.96	66	em, x-ray
