# Supplementary material for: Repertoire of morphable proteins in an organism
Source: PeerJ. 2020 Feb 11;8:e8606. doi: 10.7717/peerj.8606 (PMC7020816; doi:10.7717/peerj.8606)
Supplement: Supplemental Information 3 — Chain list for a UniProt ID (P0A8P1, AAT of E. coli) prepared by custamized tabulation on the PDB site. The column O includes the analyzed amino acid length (DSA***), the sequence range (***-***), and the order of chain usage. The average resolution of the used chains is shown in the bottom of the column H. [file peerj-08-8606-s003.xlsx]

## Sheet: tabularResults (64)
PDB ID	Chain ID	Space Group	Length A	Length B	Length C	Structure Title	Resolution	Residue Count	Temp (K)	pH Value	Macromolecule Name	Chain Length	DB ID	DSA123(110-232)
2CXA	A	C 1 2 1	68.28	44.78	76.38	Crystal structure of Leucyl/phenylalanyl-tRNA protein transferase from Escherichia coli	1.6		293	8.5	Leucyl/phenylalanyl-tRNA-protein transferase	256	P0A8P1	1
2DPS	A	P 21 21 2	114.04	129.63	38.75	Structure of Leucyl/phenylalanyl-tRNA-protein transferase	2.4		297.3	8.1	Leucyl/phenylalanyl-tRNA--protein transferase	254	P0A8P1	2
2DPS	B	P 21 21 2	114.04	129.63	38.75	Structure of Leucyl/phenylalanyl-tRNA-protein transferase	2.4		297.3	8.1	Leucyl/phenylalanyl-tRNA--protein transferase	254	P0A8P1
2DPT	A	P 21 21 2	115.66	129.14	38.57	Leucyl/phenylalanyl-tRNA-protein transferase complexed with puromycin	2.75		297	8	Leucyl/phenylalanyl-tRNA--protein transferase	254	P0A8P1	3
2DPT	B	P 21 21 2	115.66	129.14	38.57	Leucyl/phenylalanyl-tRNA-protein transferase complexed with puromycin	2.75		297	8	Leucyl/phenylalanyl-tRNA--protein transferase	254	P0A8P1
2Z3K	A	P 21 21 2	115.11	129.85	38.69	complex structure of LF-transferase and rAF	2.85		293	8	Leucyl/phenylalanyl-tRNA-protein transferase	233	P0A8P1	4
2Z3K	B	P 21 21 2	115.11	129.85	38.69	complex structure of LF-transferase and rAF	2.85		293	8	Leucyl/phenylalanyl-tRNA-protein transferase	233	P0A8P1
2Z3L	A	P 21 21 2	115.54	130	38.44	complex structure of LF-transferase and peptide A	2.75		293	8	Leucyl/phenylalanyl-tRNA-protein transferase	233	P0A8P1	5
2Z3L	B	P 21 21 2	115.54	130	38.44	complex structure of LF-transferase and peptide A	2.75		293	8	Leucyl/phenylalanyl-tRNA-protein transferase	233	P0A8P1
2Z3M	A	P 21 21 2	116.68	127.68	38.35	complex structure of LF-transferase and dAF	2.7		293	8	Leucyl/phenylalanyl-tRNA-protein transferase	233	P0A8P1	6
2Z3M	B	P 21 21 2	116.68	127.68	38.35	complex structure of LF-transferase and dAF	2.7		293	8	Leucyl/phenylalanyl-tRNA-protein transferase	233	P0A8P1
2Z3N	A	P 21 21 2	114.94	130.1	38.35	complex structure of LF-transferase and peptide B	2.5		293	8	Leucyl/phenylalanyl-tRNA-protein transferase	233	P0A8P1	7
2Z3N	B	P 21 21 2	114.94	130.1	38.35	complex structure of LF-transferase and peptide B	2.5		293	8	Leucyl/phenylalanyl-tRNA-protein transferase	233	P0A8P1
2Z3O	A	P 21 21 2	115.49	129.25	38.68	complex structure of LF-transferase and phenylalanine	2.4		293	8	Leucyl/phenylalanyl-tRNA-protein transferase	233	P0A8P1	8
2Z3O	B	P 21 21 2	115.49	129.25	38.68	complex structure of LF-transferase and phenylalanine	2.4		293	8	Leucyl/phenylalanyl-tRNA-protein transferase	233	P0A8P1
2Z3P	A	P 21 21 2	115.68	129.2	38.8	complex structure of LF-transferase and leucine	2.5		293	8	Leucyl/phenylalanyl-tRNA-protein transferase	233	P0A8P1	9
2Z3P	B	P 21 21 2	115.68	129.2	38.8	complex structure of LF-transferase and leucine	2.5		293	8	Leucyl/phenylalanyl-tRNA-protein transferase	233	P0A8P1
							2.49

## Sheet: Sheet1
PDB ID	Chain ID	Space Group	Length A	Length B	Length C	Structure Title	Resolution	Residue Count	Temp (K)	pH Value	Macromolecule Name	Chain Length	DB ID
3EBB	A	C 1 2 1	103.38	68.65	143.98	PLAP/P97 complex	1.9	1256	298	8.5	PHOSPHOLIPASE A2-ACTIVATING PROTEIN	304	Q9Y263
3EBB	B	C 1 2 1	103.38	68.65	143.98	PLAP/P97 complex	1.9	1256	298	8.5	PHOSPHOLIPASE A2-ACTIVATING PROTEIN	304	Q9Y263
3EBB	C	C 1 2 1	103.38	68.65	143.98	PLAP/P97 complex	1.9	1256	298	8.5	PHOSPHOLIPASE A2-ACTIVATING PROTEIN	304	Q9Y263
3EBB	D	C 1 2 1	103.38	68.65	143.98	PLAP/P97 complex	1.9	1256	298	8.5	PHOSPHOLIPASE A2-ACTIVATING PROTEIN	304	Q9Y263
3EBB	E	C 1 2 1	103.38	68.65	143.98	PLAP/P97 complex	1.9	1256	298	8.5	TRANSITIONAL ENDOPLASMIC RETICULUM ATPASE (TER ATP	10	P55072
3EBB	F	C 1 2 1	103.38	68.65	143.98	PLAP/P97 complex	1.9	1256	298	8.5	TRANSITIONAL ENDOPLASMIC RETICULUM ATPASE (TER ATP	10	P55072
3EBB	G	C 1 2 1	103.38	68.65	143.98	PLAP/P97 complex	1.9	1256	298	8.5	TRANSITIONAL ENDOPLASMIC RETICULUM ATPASE (TER ATP	10	P55072
3EBB	H	C 1 2 1	103.38	68.65	143.98	PLAP/P97 complex	1.9	1256	298	8.5	TRANSITIONAL ENDOPLASMIC RETICULUM ATPASE (TER ATP	10	P55072
3HU1	A	P 1	92.76	103.28	107.69	Structure of p97 N-D1 R95G mutant in complex with ATPgS	2.81	2934	288	5.8	Transitional endoplasmic reticulum ATPase	489	P55072
3HU1	B	P 1	92.76	103.28	107.69	Structure of p97 N-D1 R95G mutant in complex with ATPgS	2.81	2934	288	5.8	Transitional endoplasmic reticulum ATPase	489	P55072
3HU1	C	P 1	92.76	103.28	107.69	Structure of p97 N-D1 R95G mutant in complex with ATPgS	2.81	2934	288	5.8	Transitional endoplasmic reticulum ATPase	489	P55072
3HU1	D	P 1	92.76	103.28	107.69	Structure of p97 N-D1 R95G mutant in complex with ATPgS	2.81	2934	288	5.8	Transitional endoplasmic reticulum ATPase	489	P55072
3HU1	E	P 1	92.76	103.28	107.69	Structure of p97 N-D1 R95G mutant in complex with ATPgS	2.81	2934	288	5.8	Transitional endoplasmic reticulum ATPase	489	P55072
3HU1	F	P 1	92.76	103.28	107.69	Structure of p97 N-D1 R95G mutant in complex with ATPgS	2.81	2934	288	5.8	Transitional endoplasmic reticulum ATPase	489	P55072
3HU2	A	P 1	90.89	102.64	107.18	Structure of p97 N-D1 R86A mutant in complex with ATPgS	2.85	2934	288	5.8	Transitional endoplasmic reticulum ATPase	489	P55072
3HU2	B	P 1	90.89	102.64	107.18	Structure of p97 N-D1 R86A mutant in complex with ATPgS	2.85	2934	288	5.8	Transitional endoplasmic reticulum ATPase	489	P55072
3HU2	C	P 1	90.89	102.64	107.18	Structure of p97 N-D1 R86A mutant in complex with ATPgS	2.85	2934	288	5.8	Transitional endoplasmic reticulum ATPase	489	P55072
3HU2	D	P 1	90.89	102.64	107.18	Structure of p97 N-D1 R86A mutant in complex with ATPgS	2.85	2934	288	5.8	Transitional endoplasmic reticulum ATPase	489	P55072
3HU2	E	P 1	90.89	102.64	107.18	Structure of p97 N-D1 R86A mutant in complex with ATPgS	2.85	2934	288	5.8	Transitional endoplasmic reticulum ATPase	489	P55072
3HU2	F	P 1	90.89	102.64	107.18	Structure of p97 N-D1 R86A mutant in complex with ATPgS	2.85	2934	288	5.8	Transitional endoplasmic reticulum ATPase	489	P55072
3HU3	A	H 3	134.21	134.21	182.89	Structure of p97 N-D1 R155H mutant in complex with ATPgS	2.2	978	288	5.6	Transitional endoplasmic reticulum ATPase	489	P55072
3HU3	B	H 3	134.21	134.21	182.89	Structure of p97 N-D1 R155H mutant in complex with ATPgS	2.2	978	288	5.6	Transitional endoplasmic reticulum ATPase	489	P55072
3QC8	A	C 2 2 21	58.07	72.74	130.59	Crystal Structure of FAF1 UBX Domain In Complex with p97/VCP N Domain Reveals The Conserved FcisP Touch-Turn Motif of UBX Domain Suffering Conformational Change	2.2	262	298	8.5	Transitional endoplasmic reticulum ATPase	178	P55072
3QC8	B	C 2 2 21	58.07	72.74	130.59	Crystal Structure of FAF1 UBX Domain In Complex with p97/VCP N Domain Reveals The Conserved FcisP Touch-Turn Motif of UBX Domain Suffering Conformational Change	2.2	262	298	8.5	FAS-associated factor 1	84	Q9UNN5
3QQ7	A	P 31	60.56	60.56	63.11	Crystal Structure of the p97 N-terminal domain	2.65	186	298	4.5	Transitional endoplasmic reticulum ATPase	186	P55072
3QQ8	A	P 65	88.08	88.08	66.91	Crystal structure of p97-N in complex with FAF1-UBX	2	271	298	8.5	Transitional endoplasmic reticulum ATPase	186	P55072
3QQ8	B	P 65	88.08	88.08	66.91	Crystal structure of p97-N in complex with FAF1-UBX	2	271	298	8.5	FAS-associated factor 1	85	Q9UNN5
3QWZ	A	C 1 2 1	67.49	59.94	75.54	Crystal structure of FAF1 UBX-p97N-domain complex	2	295	295	7.5	Transitional endoplasmic reticulum ATPase	211	P55072
3QWZ	B	C 1 2 1	67.49	59.94	75.54	Crystal structure of FAF1 UBX-p97N-domain complex	2	295	295	7.5	FAS-associated factor 1	84	Q9UNN5
3TIW	A	P 32	70.24	70.24	74.82	Crystal structure of p97N in complex with the C-terminus of gp78	1.8	412	298	7	Transitional endoplasmic reticulum ATPase	187	P55072
3TIW	B	P 32	70.24	70.24	74.82	Crystal structure of p97N in complex with the C-terminus of gp78	1.8	412	298	7	Transitional endoplasmic reticulum ATPase	187	P55072
3TIW	C	P 32	70.24	70.24	74.82	Crystal structure of p97N in complex with the C-terminus of gp78	1.8	412	298	7	E3 ubiquitin-protein ligase AMFR	19	Q9UKV5
3TIW	D	P 32	70.24	70.24	74.82	Crystal structure of p97N in complex with the C-terminus of gp78	1.8	412	298	7	E3 ubiquitin-protein ligase AMFR	19	Q9UKV5
4KDI	A	P 21 21 21	42.82	88.61	143.54	Crystal structure of p97/VCP N in complex with OTU1 UBXL	1.86	566	295	5	Transitional endoplasmic reticulum ATPase	193	P55072
4KDI	B	P 21 21 21	42.82	88.61	143.54	Crystal structure of p97/VCP N in complex with OTU1 UBXL	1.86	566	295	5	Transitional endoplasmic reticulum ATPase	193	P55072
4KDI	C	P 21 21 21	42.82	88.61	143.54	Crystal structure of p97/VCP N in complex with OTU1 UBXL	1.86	566	295	5	Ubiquitin thioesterase OTU1	90	P43558
4KDI	D	P 21 21 21	42.82	88.61	143.54	Crystal structure of p97/VCP N in complex with OTU1 UBXL	1.86	566	295	5	Ubiquitin thioesterase OTU1	90	P43558
4KDL	A	P 21 21 21	43.6	60.8	111.92	Crystal structure of p97/VCP N in complex with OTU1 UBXL	1.81	283	295	5	Transitional endoplasmic reticulum ATPase	193	P55072
4KDL	B	P 21 21 21	43.6	60.8	111.92	Crystal structure of p97/VCP N in complex with OTU1 UBXL	1.81	283	295	5	Ubiquitin thioesterase OTU1	90	P43558
4KLN	A	P 1	91.15	104.51	109.53	Structure of p97 N-D1 A232E mutant in complex with ATPgS	2.62	2934	288	5.8	Transitional endoplasmic reticulum ATPase	489	P55072
4KLN	B	P 1	91.15	104.51	109.53	Structure of p97 N-D1 A232E mutant in complex with ATPgS	2.62	2934	288	5.8	Transitional endoplasmic reticulum ATPase	489	P55072
4KLN	C	P 1	91.15	104.51	109.53	Structure of p97 N-D1 A232E mutant in complex with ATPgS	2.62	2934	288	5.8	Transitional endoplasmic reticulum ATPase	489	P55072
4KLN	D	P 1	91.15	104.51	109.53	Structure of p97 N-D1 A232E mutant in complex with ATPgS	2.62	2934	288	5.8	Transitional endoplasmic reticulum ATPase	489	P55072
4KLN	E	P 1	91.15	104.51	109.53	Structure of p97 N-D1 A232E mutant in complex with ATPgS	2.62	2934	288	5.8	Transitional endoplasmic reticulum ATPase	489	P55072
4KLN	F	P 1	91.15	104.51	109.53	Structure of p97 N-D1 A232E mutant in complex with ATPgS	2.62	2934	288	5.8	Transitional endoplasmic reticulum ATPase	489	P55072
4KO8	A	H 3	134.21	134.21	182.89	Structure of p97 N-D1 R155H mutant in complex with ATPgS	1.98	978	288	5.6	Transitional endoplasmic reticulum ATPase	489	P55072
4KO8	B	H 3	134.21	134.21	182.89	Structure of p97 N-D1 R155H mutant in complex with ATPgS	1.98	978	288	5.6	Transitional endoplasmic reticulum ATPase	489	P55072
4KOD	A	P 21 21 21	146.52	170.74	256.6	Structure of p97 N-D1 R155H mutant in complex with ADP	2.96	5868	288	5.8	Transitional endoplasmic reticulum ATPase	489	P55072
4KOD	B	P 21 21 21	146.52	170.74	256.6	Structure of p97 N-D1 R155H mutant in complex with ADP	2.96	5868	288	5.8	Transitional endoplasmic reticulum ATPase	489	P55072
4KOD	C	P 21 21 21	146.52	170.74	256.6	Structure of p97 N-D1 R155H mutant in complex with ADP	2.96	5868	288	5.8	Transitional endoplasmic reticulum ATPase	489	P55072
4KOD	D	P 21 21 21	146.52	170.74	256.6	Structure of p97 N-D1 R155H mutant in complex with ADP	2.96	5868	288	5.8	Transitional endoplasmic reticulum ATPase	489	P55072
4KOD	E	P 21 21 21	146.52	170.74	256.6	Structure of p97 N-D1 R155H mutant in complex with ADP	2.96	5868	288	5.8	Transitional endoplasmic reticulum ATPase	489	P55072
4KOD	F	P 21 21 21	146.52	170.74	256.6	Structure of p97 N-D1 R155H mutant in complex with ADP	2.96	5868	288	5.8	Transitional endoplasmic reticulum ATPase	489	P55072
4KOD	G	P 21 21 21	146.52	170.74	256.6	Structure of p97 N-D1 R155H mutant in complex with ADP	2.96	5868	288	5.8	Transitional endoplasmic reticulum ATPase	489	P55072
4KOD	H	P 21 21 21	146.52	170.74	256.6	Structure of p97 N-D1 R155H mutant in complex with ADP	2.96	5868	288	5.8	Transitional endoplasmic reticulum ATPase	489	P55072
4KOD	I	P 21 21 21	146.52	170.74	256.6	Structure of p97 N-D1 R155H mutant in complex with ADP	2.96	5868	288	5.8	Transitional endoplasmic reticulum ATPase	489	P55072
4KOD	J	P 21 21 21	146.52	170.74	256.6	Structure of p97 N-D1 R155H mutant in complex with ADP	2.96	5868	288	5.8	Transitional endoplasmic reticulum ATPase	489	P55072
4KOD	K	P 21 21 21	146.52	170.74	256.6	Structure of p97 N-D1 R155H mutant in complex with ADP	2.96	5868	288	5.8	Transitional endoplasmic reticulum ATPase	489	P55072
4KOD	L	P 21 21 21	146.52	170.74	256.6	Structure of p97 N-D1 R155H mutant in complex with ADP	2.96	5868	288	5.8	Transitional endoplasmic reticulum ATPase	489	P55072
4P0A	A	P 61	48.04	48.04	266.62	Crystal structure of HOIP PUB domain in complex with p97 PIM	2.3	388	293	6.5	E3 ubiquitin-protein ligase RNF31	184	Q96EP0
4P0A	B	P 61	48.04	48.04	266.62	Crystal structure of HOIP PUB domain in complex with p97 PIM	2.3	388	293	6.5	Transitional endoplasmic reticulum ATPase	10	P55072
4P0A	C	P 61	48.04	48.04	266.62	Crystal structure of HOIP PUB domain in complex with p97 PIM	2.3	388	293	6.5	E3 ubiquitin-protein ligase RNF31	184	Q96EP0
4P0A	D	P 61	48.04	48.04	266.62	Crystal structure of HOIP PUB domain in complex with p97 PIM	2.3	388	293	6.5	Transitional endoplasmic reticulum ATPase	10	P55072
5C18	A	P 21 21 21	140.33	180.06	255.61	p97-delta709-728 in complex with ATP-gamma-S	3.3	4710	298		Transitional endoplasmic reticulum ATPase	785	P55072
5C18	B	P 21 21 21	140.33	180.06	255.61	p97-delta709-728 in complex with ATP-gamma-S	3.3	4710	298		Transitional endoplasmic reticulum ATPase	785	P55072
5C18	C	P 21 21 21	140.33	180.06	255.61	p97-delta709-728 in complex with ATP-gamma-S	3.3	4710	298		Transitional endoplasmic reticulum ATPase	785	P55072
5C18	D	P 21 21 21	140.33	180.06	255.61	p97-delta709-728 in complex with ATP-gamma-S	3.3	4710	298		Transitional endoplasmic reticulum ATPase	785	P55072
5C18	E	P 21 21 21	140.33	180.06	255.61	p97-delta709-728 in complex with ATP-gamma-S	3.3	4710	298		Transitional endoplasmic reticulum ATPase	785	P55072
5C18	F	P 21 21 21	140.33	180.06	255.61	p97-delta709-728 in complex with ATP-gamma-S	3.3	4710	298		Transitional endoplasmic reticulum ATPase	785	P55072
5C19	A	P 21 21 21	137.66	165.78	243.99	p97 variant 2 in the apo state	4.2	4830	298		Transitional endoplasmic reticulum ATPase	805	P55072
5C19	B	P 21 21 21	137.66	165.78	243.99	p97 variant 2 in the apo state	4.2	4830	298		Transitional endoplasmic reticulum ATPase	805	P55072
5C19	C	P 21 21 21	137.66	165.78	243.99	p97 variant 2 in the apo state	4.2	4830	298		Transitional endoplasmic reticulum ATPase	805	P55072
5C19	D	P 21 21 21	137.66	165.78	243.99	p97 variant 2 in the apo state	4.2	4830	298		Transitional endoplasmic reticulum ATPase	805	P55072
5C19	E	P 21 21 21	137.66	165.78	243.99	p97 variant 2 in the apo state	4.2	4830	298		Transitional endoplasmic reticulum ATPase	805	P55072
5C19	F	P 21 21 21	137.66	165.78	243.99	p97 variant 2 in the apo state	4.2	4830	298		Transitional endoplasmic reticulum ATPase	805	P55072
5C1A	A	P 1 21 1	182.67	145.47	251.4	p97-N750D/R753D/M757D/Q760D in complex with ATP-gamma-S	3.8	9660	298		Transitional endoplasmic reticulum ATPase	805	P55072
5C1A	B	P 1 21 1	182.67	145.47	251.4	p97-N750D/R753D/M757D/Q760D in complex with ATP-gamma-S	3.8	9660	298		Transitional endoplasmic reticulum ATPase	805	P55072
5C1A	C	P 1 21 1	182.67	145.47	251.4	p97-N750D/R753D/M757D/Q760D in complex with ATP-gamma-S	3.8	9660	298		Transitional endoplasmic reticulum ATPase	805	P55072
5C1A	D	P 1 21 1	182.67	145.47	251.4	p97-N750D/R753D/M757D/Q760D in complex with ATP-gamma-S	3.8	9660	298		Transitional endoplasmic reticulum ATPase	805	P55072
5C1A	E	P 1 21 1	182.67	145.47	251.4	p97-N750D/R753D/M757D/Q760D in complex with ATP-gamma-S	3.8	9660	298		Transitional endoplasmic reticulum ATPase	805	P55072
5C1A	F	P 1 21 1	182.67	145.47	251.4	p97-N750D/R753D/M757D/Q760D in complex with ATP-gamma-S	3.8	9660	298		Transitional endoplasmic reticulum ATPase	805	P55072
5C1A	G	P 1 21 1	182.67	145.47	251.4	p97-N750D/R753D/M757D/Q760D in complex with ATP-gamma-S	3.8	9660	298		Transitional endoplasmic reticulum ATPase	805	P55072
5C1A	H	P 1 21 1	182.67	145.47	251.4	p97-N750D/R753D/M757D/Q760D in complex with ATP-gamma-S	3.8	9660	298		Transitional endoplasmic reticulum ATPase	805	P55072
5C1A	I	P 1 21 1	182.67	145.47	251.4	p97-N750D/R753D/M757D/Q760D in complex with ATP-gamma-S	3.8	9660	298		Transitional endoplasmic reticulum ATPase	805	P55072
5C1A	J	P 1 21 1	182.67	145.47	251.4	p97-N750D/R753D/M757D/Q760D in complex with ATP-gamma-S	3.8	9660	298		Transitional endoplasmic reticulum ATPase	805	P55072
5C1A	K	P 1 21 1	182.67	145.47	251.4	p97-N750D/R753D/M757D/Q760D in complex with ATP-gamma-S	3.8	9660	298		Transitional endoplasmic reticulum ATPase	805	P55072
5C1A	L	P 1 21 1	182.67	145.47	251.4	p97-N750D/R753D/M757D/Q760D in complex with ATP-gamma-S	3.8	9660	298		Transitional endoplasmic reticulum ATPase	805	P55072
5C1B	A	P 21 21 21	140.71	180.66	254.96	p97-delta709-728 in complex with a UFD1-SHP peptide	3.08	4752	298		Transitional endoplasmic reticulum ATPase	785	P55072
5C1B	B	P 21 21 21	140.71	180.66	254.96	p97-delta709-728 in complex with a UFD1-SHP peptide	3.08	4752	298		Transitional endoplasmic reticulum ATPase	785	P55072
5C1B	C	P 21 21 21	140.71	180.66	254.96	p97-delta709-728 in complex with a UFD1-SHP peptide	3.08	4752	298		Transitional endoplasmic reticulum ATPase	785	P55072
5C1B	D	P 21 21 21	140.71	180.66	254.96	p97-delta709-728 in complex with a UFD1-SHP peptide	3.08	4752	298		Transitional endoplasmic reticulum ATPase	785	P55072
5C1B	E	P 21 21 21	140.71	180.66	254.96	p97-delta709-728 in complex with a UFD1-SHP peptide	3.08	4752	298		Transitional endoplasmic reticulum ATPase	785	P55072
5C1B	F	P 21 21 21	140.71	180.66	254.96	p97-delta709-728 in complex with a UFD1-SHP peptide	3.08	4752	298		Transitional endoplasmic reticulum ATPase	785	P55072
5C1B	U	P 21 21 21	140.71	180.66	254.96	p97-delta709-728 in complex with a UFD1-SHP peptide	3.08	4752	298		Ubiquitin fusion degradation protein 1 homolog	21	Q92890
5C1B	V	P 21 21 21	140.71	180.66	254.96	p97-delta709-728 in complex with a UFD1-SHP peptide	3.08	4752	298		Ubiquitin fusion degradation protein 1 homolog	21	Q92890
5DYG	A	P 6 2 2	145.58	145.58	84	Structure of p97 N-D1 L198W mutant in complex with ADP	2.2	468	289	6	Transitional endoplasmic reticulum ATPase	468	P55072
5DYI	A	P 21 21 21	146.44	176.21	256.87	Structure of p97 N-D1 wild-type in complex with ADP	3.71	5868	289	6	Transitional endoplasmic reticulum ATPase	489	P55072
5DYI	B	P 21 21 21	146.44	176.21	256.87	Structure of p97 N-D1 wild-type in complex with ADP	3.71	5868	289	6	Transitional endoplasmic reticulum ATPase	489	P55072
5DYI	C	P 21 21 21	146.44	176.21	256.87	Structure of p97 N-D1 wild-type in complex with ADP	3.71	5868	289	6	Transitional endoplasmic reticulum ATPase	489	P55072
5DYI	D	P 21 21 21	146.44	176.21	256.87	Structure of p97 N-D1 wild-type in complex with ADP	3.71	5868	289	6	Transitional endoplasmic reticulum ATPase	489	P55072
5DYI	E	P 21 21 21	146.44	176.21	256.87	Structure of p97 N-D1 wild-type in complex with ADP	3.71	5868	289	6	Transitional endoplasmic reticulum ATPase	489	P55072
5DYI	F	P 21 21 21	146.44	176.21	256.87	Structure of p97 N-D1 wild-type in complex with ADP	3.71	5868	289	6	Transitional endoplasmic reticulum ATPase	489	P55072
5DYI	G	P 21 21 21	146.44	176.21	256.87	Structure of p97 N-D1 wild-type in complex with ADP	3.71	5868	289	6	Transitional endoplasmic reticulum ATPase	489	P55072
5DYI	H	P 21 21 21	146.44	176.21	256.87	Structure of p97 N-D1 wild-type in complex with ADP	3.71	5868	289	6	Transitional endoplasmic reticulum ATPase	489	P55072
5DYI	I	P 21 21 21	146.44	176.21	256.87	Structure of p97 N-D1 wild-type in complex with ADP	3.71	5868	289	6	Transitional endoplasmic reticulum ATPase	489	P55072
5DYI	J	P 21 21 21	146.44	176.21	256.87	Structure of p97 N-D1 wild-type in complex with ADP	3.71	5868	289	6	Transitional endoplasmic reticulum ATPase	489	P55072
5DYI	K	P 21 21 21	146.44	176.21	256.87	Structure of p97 N-D1 wild-type in complex with ADP	3.71	5868	289	6	Transitional endoplasmic reticulum ATPase	489	P55072
5DYI	L	P 21 21 21	146.44	176.21	256.87	Structure of p97 N-D1 wild-type in complex with ADP	3.71	5868	289	6	Transitional endoplasmic reticulum ATPase	489	P55072
